# Supplementary material
Source: ML conference proceedings conference paper supplement (https://proceedings.mlr.press/v139/konobeev21a.html)
Supplement: Supplementary file 2 [file konobeev21a-supp.zip]

Archive with 29 entries (23 files):
- README.md
- inmeta/
- inmeta/task.py
- inmeta/plot.py
- inmeta/meta_learner.py
- inmeta/__init__.py
- inmeta/__pycache__/
- inmeta/experiment.py
- inmeta/scripts/
- inmeta/scripts/container_run.sh
- inmeta/scripts/__init__.py
- inmeta/scripts/__pycache__/
- inmeta/scripts/gcloud.py
- inmeta/scripts/inmeta
- inmeta/scripts/attach.sh
- inmeta/factory/
- inmeta/factory/synthetic.py
- inmeta/factory/school.py
- inmeta/factory/__init__.py
- inmeta/factory/__pycache__/
- inmeta/factory/factory.py
- setup.py
- data/ILEA567.ASC
- data/ILEA567.DAT
- data/ILEA567.WS
- data/school.npz
- notebooks/school.ipynb
- notebooks/paper.ipynb
- supp.pdf
