# Supplementary material
Source: ML conference proceedings conference paper supplement (https://proceedings.mlr.press/v139/konobeev21a.html)
Supplement: Supplementary file 2 [file konobeev21a-supp.zip › data/ILEA567.ASC]

                                        
                             Data File ILEA567.DAT


     The dataset come from the Inner London Education Authority (ILEA),
consisting of examination records from 140 secondary schools in years 1985,
1986 and 1987. It is a random 50% sample with 15362 students. The data have
been used to study the effectiveness of schools. The file has following format:


     Column    Description              Coding

     1         Year                     1985=1; 1986=2; 1987=3

     2-4       School                   Codes 1-139

     5-6       Exam Score               Numeric score

     7-8       % FSM                    Percent. students eligible for free
                                        school meals

     9-10      % VR1 band               Percent. students in school in VR band
                                        1

     11        Gender                   Male=0; Female=1

     12        VR band of student       VR1=2; VR2=3; VR3=1

     13-14     Ethnic group of          ESWI=1*; African=2; Arab=3;
               student                  Bangladeshi=4; Caribbean=5;
                                        Greek=6;Indian=7;Pakistani=8;
                                        S.E.Asian=9;Turkish=10; Other=11

                                        Mixed=1; Male=2; Female=3
     15        School gender
                                        Maintained=1; Church of
     16        School denomination      England=2; Roman Catholic=3


      *  ESWI: Students born in England, Scotland, Wales or Ireland.


                               Further References


     Aitkin, M. & Longford,N. (1986). Statistical modelling in school
     effectiveness. Journal of the Royal Statistical Society A, 149,1-43.

     Goldstein, H. (1987). Multilevel models in educational and social
     research. London, Griffin: New York, Oxford University Press.

     Goldstein, H. (1991). Multilevel modelling of survey data. The
     Statistician, 40 235-244.

     ILEA Research and Statistics (1986). Looking at school performance, (RS
     1058/86). London: ILEA Research and Statistics.

     ILEA Research and Statistics (1987a). Actual and predicted examination
     scores in schools, (RS 1129/87). London: ILEA Research and Statistics.

     ILEA Research and Statistics (1987b). Ethnic background and examination
     results-1985 and 1986, (RS 1120/87). London: ILEA Research and Statistics.

     Nuttall,D.L., Goldstein,H., Prosser,R and Rasbash,J. (1990). Differential
     School Effectiveness. International Journal of Educational Research, 13,
     769-776.

     Prosser,R.,Rasbash,J.,& Goldstein,H. ( 1991 ). ML3 Software for
     Three-level Analysis, Users' Guide for V.2, Institute of Education,
     University of London.
