# Supplementary material
Source: ML conference proceedings conference paper supplement (https://proceedings.mlr.press/v139/konobeev21a.html)
Supplement: Supplementary file 2 [file konobeev21a-supp.zip › data/ILEA567.DAT]

1  117241803 111
1  1 5241803 111
1  116241803 111
1  112241803 111
1  1 7241803 111
1  120241813 111
1  115241813 111
1  116241811 111
1  126241813 111
1  1 5241813 111
1  118241803 111
1  124241812 111
1  1 9241813 111
1  115241811 111
1  131241812 111
1  1 7241803 511
1  111241813 111
1  129241812 111
1  122241803 111
1  128241812 111
1  127241802 111
1  1 5241803 111
1  117241803 111
1  115241803 111
1  1 5241803 111
1  1182418131011
1  121241813 111
1  122241812 111
1  1 6241801 111
1  1 8241811 111
1  1 9241801 111
1  122241813 111
1  110241813 111
1  117241811 111
1  119241803 111
1  130241813 211
1  127241802 911
1  1 2241813 111
1  1 2241803 111
1  126241802 111
1  122241813 111
1  1 4241801 111
1  111241813 111
1  1 5241802 111
1  114241813 111
1  1 8241813 111
1  130241802 111
1  118241813 111
1  1 7241801 511
1  110241803 111
1  112241811 511
1  116241803 111
1  117241812 111
1  117241802 111
1  124241813 111
1  139241801 911
1  122241802 111
1  1 3241801 911
1  116241803 111
1  119241813 111
1  116241802 111
1  1 5241803 111
1  116241813 311
1  118241802 111
1  131241813 111
1  123241803 111
1  118241813 111
1  130241812 111
1  150241802 711
1  1 4241811 111
1  125241813 111
1  113241813 111
1  132241803 111
1  126241812 111
1  1 8241813 111
1  118241812 111
1  123241802 111
1  1222418031111
1  112241801 111
1  1 3241813 111
2  1 14317111111
2  127431702 111
2  119431703 711
2  124431703 111
2  114431701 111
2  1 5431701 111
2  1 5431711 511
2  1 7431713 111
2  123431702 111
2  126431702 111
2  1 2431713 111
2  117431713 511
2  135431703 111
2  1 1431701 111
2  151431712 111
2  111431701 111
2  114431703 111
2  128431713 111
2  1 1431713 111
2  119431713 111
2  122431713 111
2  1 2431711 111
2  132431702 111
2  1 9431701 111
2  110431701 111
2  114431703 111
2  118431713 111
2  1 4431701 111
2  117431713 111
2  122431711 111
2  1 2431703 111
2  131431712 111
2  1 9431711 111
2  114431711 511
2  1 5431713 111
2  117431713 111
2  146431703 111
2  117431703 711
2  1 9431703 111
2  117431703 111
2  1 5431712 111
2  125431713 111
2  1 9431713 111
2  116431703 111
2  127431713 111
2  130431713 111
2  1 4431713 111
2  1354317121111
2  125431712 111
2  114431701 111
2  113431713 111
2  130431713 111
2  1 2431703 111
2  126431703 111
2  110431711 111
2  149431702 711
2  1 4431701 111
2  125431712 111
2  1 1431711 111
3  116431203 111
3  1 64312131111
3  128431213 111
3  1 9431213 111
3  123431213 111
3  118431211 111
3  1 5431211 111
3  143431212 111
3  116431211 111
3  117431203 111
3  110431211 111
3  1 5431212 111
3  128431213 111
3  119431203 111
3  122431213 111
3  1 2431201 111
3  111431213 111
3  133431212 111
3  1 9431202 111
3  1 7431202 111
3  111431203 111
3  136431213 111
3  110431213 111
3  122431213 111
3  130431213 111
3  1 9431212 111
3  111431201 111
3  123431213 111
3  1 7431201 111
3  115431213 111
3  1 8431211 111
3  1 3431203 111
3  114431213 111
3  141431213 111
3  110431213 111
3  117431213 511
3  130431213 111
3  132431213 711
3  112431201 111
3  1 2431213 111
3  1 5431211 111
3  1 6431203 111
3  115431201 711
3  119431202 111
3  135431212 111
3  110431201 111
3  115431213 111
3  1 4431213 111
3  116431201 111
3  1 5431213 111
3  1 7431213 111
3  114431203 111
3  123431203 111
3  143431202 111
3  114431212 111
3  1 3431202 111
3  124431213 111
3  112431211 111
3  1 7431211 111
3  149431213 111
3  124431203 111
2  230542603 111
2  260542602 111
2  248542602 111
2  225542602 111
2  215542613 111
2  230542613 111
2  2325426031111
2  232542602 111
2  2 15426011111
2  2 35426111011
2  213542613 511
2  217542602 111
2  2205426121111
2  240542612 111
2  245542612 111
2  2 5542613 511
2  245542602 111
2  2 2542613 611
2  2 1542601 411
2  2215426021011
2  229542611 111
2  2105426011111
2  210542613 111
2  230542603 111
2  232542613 111
2  214542603 511
2  238542613 111
2  212542603 511
2  232542612 111
2  2395426021111
2  218542603 111
2  2 3542611 111
2  211542603 111
2  220542613 111
2  225542603 111
2  213542603 111
2  226542612 111
2  218542603 111
2  235542613 611
2  2 1542611 211
2  2 9542611 511
2  246542613 111
2  212542601 111
2  239542613 111
2  214542601 111
2  250542602 111
2  2 1542603 111
2  241542612 111
3  2 4542601 111
3  270542612 111
3  256542613 111
3  248542602 111
3  240542603 611
3  228542603 911
3  2705426121111
3  219542601 911
3  2 1542611 611
3  212542603 511
3  2 9542611 611
3  247542612 111
3  230542612 111
3  217542611 911
3  211542611 511
3  224542601 511
3  2 5542601 111
3  246542602 111
3  240542613 111
3  244542612 611
3  222542603 111
3  236542602 111
3  214542613 511
3  2 4542611 111
3  2 8542611 911
3  2 5542601 111
3  2385426131111
3  230542603 111
3  245542602 111
3  2 8542603 111
3  238542612 111
3  248542602 111
3  241542612 111
3  2545426121111
3  2315426131111
3  239542613 111
3  2 5542601 111
3  228542603 111
3  2 2542603 511
3  247542602 111
3  2 6542603 111
3  249542602 111
3  220542613 111
1  320242102 122
1  312242103 122
1  316242101 122
1  310242103 522
1  3 9242103 122
1  319242103 122
1  319242103 222
1  318242103 522
1  310242103 122
1  322242103 122
1  352242102 122
1  3 1242101 222
1  3 9242102 222
1  3 1242101 522
1  313242103 122
1  3 9242101 522
1  312242103 122
1  324242103 122
1  325242102 722
1  3 6242103 522
1  323242103 122
1  3 9242103 222
1  3 4242103 122
1  332242102 122
1  327242102 122
1  312242101 122
1  331242102 122
1  3 3242103 522
1  315242103 322
1  328242103 522
1  318242103 522
1  320242102 122
1  3 6242101 122
2  311371901 522
2  339371902 622
2  310371901 522
2  322371903 122
2  3 8371903 522
2  332371903 922
2  320371903 522
2  321371903 122
2  318371901 522
2  323371903 122
2  313371901 122
2  3 4371901 522
2  325371903 122
2  317371903 522
2  311371903 522
2  3 4371901 522
2  329371903 122
2  330371902 122
2  3 8371903 522
2  330371903 522
2  3 3371903 522
2  334371902 622
2  323371903 122
2  317371903 122
2  326371902 122
2  329371902 122
2  313371903 522
2  3 8371903 522
2  326371903 122
3  343372002 822
3  3 7372001 522
3  322372003 522
3  322372002 122
3  3 6372002 122
3  332372003 122
3  3 3372001 522
3  338372002 822
3  315372003 122
3  335372002 122
3  320372002 522
3  320372003 122
3  3 4372003 522
3  320372003 522
3  3 5372003 122
3  339372002 222
3  325372003 522
3  3 3372001 522
3  325372002 122
3  314372003 522
3  313372002 522
3  315372003 522
3  310372003 522
3  310372003 122
3  316372001 122
3  316372003 522
3  312372002 122
3  310372003 522
3  346372003 522
3  330372003 522
3  332372003 822
3  315372003 522
3  325372003 522
1  428202203 112
1  433202213 112
1  420202203 112
1  431202203 512
1  438202212 112
1  441202212 112
1  421202202 112
1  432202212 112
1  427202213 112
1  434202202 112
1  412202213 112
1  4 2202201 112
1  4 3202201 112
1  416202201 112
1  414202201 112
1  428202213 512
1  4 9202203 112
1  4 2202211 112
1  4 2202201 112
1  416202203 112
1  418202213 112
1  413202211 112
1  454202212 112
1  416202203 112
1  450202202 112
1  424202201 112
1  414202213 112
1  431202212 112
1  4 3202211 112
1  433202212 112
1  437202212 112
1  4 3202211 112
1  417202213 112
1  428202212 112
1  429202202 112
1  411202211 112
1  420202202 112
1  4 8202201 112
1  420202203 112
1  412202213 112
1  436202213 112
1  410202202 112
1  4322022031012
1  414202213 112
1  426202211 112
1  450202212 112
1  421202203 112
1  4 4202211 112
1  4 2202201 112
1  422202213 112
1  424202213 112
1  441202212 112
1  420202203 112
1  424202212 112
1  411202211 212
1  427202202 112
1  421202203 112
1  436202202 112
1  426202202 112
1  421202203 112
1  419202203 112
1  423202202 112
1  415202201 112
1  439202202 112
1  4 3202201 112
1  4 8202211 112
1  4202022031012
1  4 5202201 112
1  452202212 112
1  420202203 112
2  4 8292303 112
2  422292303 112
2  421292313 112
2  424292313 112
2  423292312 112
2  412292303 112
2  416292302 112
2  435292302 112
2  411292311 112
2  415292303 112
2  412292311 112
2  4 6292301 112
2  4 4292303 112
2  422292311 112
2  428292303 112
2  436292313 112
2  411292313 512
2  425292302 112
2  416292303 112
2  436292312 112
2  4 8292303 112
2  423292313 112
2  431292312 112
2  410292313 112
2  4 2292311 112
2  423292313 112
2  427292313 112
2  420292313 112
2  4 7292313 112
2  417292302 112
2  4 9292303 112
2  4 5292301 112
2  415292313 112
2  426292303 112
2  415292313 112
2  428292302 112
2  417292303 112
2  4 7292301 112
2  4272923131112
2  444292312 112
2  419292313 112
2  428292303 112
2  4 1292311 112
2  419292313 112
2  433292313 112
2  427292313 512
2  424292313 112
2  435292313 112
2  434292303 612
2  4 6292311 112
2  414292303 512
2  413292313 112
2  424292313 112
2  431292312 112
2  433292313 112
2  435292312 112
2  4 2292311 112
2  414292303 112
2  418292303 112
2  410292311 512
2  422292313 512
2  428292312 112
2  4 3292311 112
2  441292303 112
2  424292303 112
2  418292303 112
3  418291903 112
3  4 6291903 112
3  437291902 112
3  415291901 112
3  424291913 112
3  420291911 112
3  416291913 112
3  422291903 112
3  414291903 112
3  430291912 212
3  428291913 112
3  4 1291901 112
3  416291913 112
3  428291903 112
3  438291913 112
3  4 8291903 112
3  417291911 112
3  417291911 112
3  419291913 112
3  421291913 112
3  4 6291911 112
3  4 2291913 112
3  421291903 112
3  4 4291901 112
3  4 9291901 112
3  4 2291901 112
3  410291903 112
3  426291913 112
3  420291913 112
3  418291913 112
3  410291903 112
3  417291903 112
3  441291902 112
3  419291903 112
3  430291913 512
3  412291903 112
3  412291902 112
3  410291913 112
3  4 7291901 112
3  432291902 112
3  422291903 112
3  4252919021112
3  427291912 112
3  416291903 112
3  421291903 112
3  410291913 512
3  425291912 112
3  423291913 112
3  420291913 112
3  410291913 112
3  410291911 112
3  4 5291901 112
3  442291912 112
3  417291903 112
3  4 6291901 112
3  4 7291911 112
3  4 7291903 112
3  410291903 112
3  434291913 112
3  410291903 112
3  411291901 112
3  4 2291902 112
3  417291912 112
3  428291903 112
3  417291913 112
3  422291902 112
3  419291911 112
3  4 3291901 112
3  421291903 112
3  437291913 112
3  427291912 112
3  422291913 112
3  428291902 112
3  4 5291903 112
3  419291902 112
3  4 8291903 112
1  531312413 511
1  525312402 511
1  510312402 211
1  544312412 111
1  5 4312403 111
1  512312403 111
1  548312412 711
1  512312411 111
1  514312403 111
1  5 1312401 811
1  5353124131111
1  5 5312401 111
1  5123124021111
1  512312403 111
1  527312402 111
1  521312403 711
1  548312402 111
1  514312401 511
1  511312413 511
1  512312401 711
1  5 3312403 111
1  5213124031111
1  5 4312401 511
1  517312412 511
1  5 9312411 111
1  524312413 511
1  5 8312401 511
1  512312413 111
1  5 5312403 111
1  521312402 111
1  5 9312401 511
1  5253124121111
1  524312413 111
1  531312412 111
1  5363124121111
1  5 1312401 511
1  540312402 111
1  522312413 511
1  528312412 111
1  5 9312402 111
1  6 2371411 511
1  613371403 111
1  6 5371411 511
1  611371403 211
1  619371402 111
1  617371402 111
1  611371403 111
1  616371403 511
1  616371411 111
1  610371403 111
1  6 9371412 111
1  624371413 111
1  624371402 511
1  6 1371413 111
1  6 8371413 511
1  619371413 111
1  632371412 111
1  611371411 111
1  6 9371413 111
1  622371403 111
1  616371413 511
1  6 4371401 511
1  640371403 911
1  616371413 111
1  6 9371411 111
1  612371413 111
1  6 4371411 511
1  610371403 111
1  610371413 511
1  6243714031111
1  6 9371401 511
1  615371403 511
1  616371413 111
1  621371413 111
1  617371403 511
1  624371412 111
1  617371413 511
1  629371402 111
1  6 8371403 111
1  631371402 511
1  639371413 111
1  6 5371402 111
1  6163714121111
1  623371402 111
1  6153714131111
1  618371402 511
1  624371403 711
1  620371411 511
1  615371413 111
1  612371403 111
1  6 4371401 511
1  629371403 111
1  6213714131111
1  621371413 111
1  6 4371403 111
1  6 6371401 511
1  6 4371413 111
2  711551201 111
2  7 1551203 111
2  710551211 111
2  712551201 111
2  718551211 111
2  7 9551203 111
2  719551211 111
2  719551201 111
2  713551211 111
2  714551203 111
2  716551203 111
2  7 9551203 111
2  7 7551211 111
2  7 4551213 111
2  724551203 111
2  717551203 111
2  720551203 111
2  717551203 111
2  719551211 111
2  7 1551211 111
2  718551213 111
2  732551212 111
2  725551212 111
2  717551203 111
2  728551213 111
3  72555 513 111
3  71455 513 111
3  7 655 513 111
3  71655 513 111
3  72055 503 111
3  7 455 511 111
3  73355 5021111
3  71555 503 111
3  71255 513 111
3  71155 511 911
3  7 355 511 111
3  72055 501 111
3  72955 513 111
3  7 855 513 111
3  72455 512 111
3  73155 511 911
3  72455 502 111
3  73755 512 111
3  73155 513 111
3  71755 511 111
3  7 755 501 111
3  73255 513 111
2  813631513 131
2  811631513 531
2  8176315111131
2  8236315121131
2  8176315111131
2  818631511 731
2  821631511 131
2  812631513 131
2  820631513 531
2  822631513 131
2  829631513 131
2  819631513 131
2  810631511 431
2  814631513 131
2  828631513 131
2  834631512 131
2  813631513 531
2  8 8631513 131
2  830631513 131
2  832631513 431
2  822631513 131
2  826631513 131
2  8 9631513 531
2  829631513 131
2  838631513 131
2  825631513 131
2  8216315111031
2  819631513 231
2  825631513 131
2  828631513 131
2  831631512 131
2  8166315111131
2  838631512 131
2  8176315131031
2  825631512 531
2  833631513 531
2  8 5631513 131
2  823631513 831
2  822631512 931
2  814631513 131
2  819631512 131
2  8 7631513 131
2  826631513 131
2  8 6631511 431
2  815631513 131
2  819631513 131
2  831631513 131
2  8 3631511 131
2  8126315121131
2  846631513 131
2  846631512 131
2  812631513 131
2  8 3631513 131
2  824631513 131
3  813631613 131
3  816631613 431
3  819631613 131
3  819631613 131
3  826631613 131
3  829631613 131
3  8 9631611 131
3  820631613 131
3  832631613 431
3  828631613 531
3  833631613 531
3  816631613 131
3  825631613 131
3  8 2631611 431
3  8 6631611 431
3  817631613 131
3  834631613 531
3  811631611 131
3  8 7631611 431
3  813631611 531
3  817631613 131
3  838631612 131
3  830631612 131
3  827631613 131
3  8 8631611 631
3  812631611 131
3  835631612 131
3  817631613 531
3  8 1631613 131
3  8 4631611 431
3  8166316111131
3  831631612 131
3  8 9631613 131
3  8226316131031
3  830631611 531
3  821631613 131
3  832631612 131
3  820631611 431
3  839631612 131
3  832631613 131
3  820631613 131
3  812631612 131
3  818631613 131
3  812631613 131
3  820631613 131
3  816631613 131
3  833631613 131
3  826631613 131
3  822631612 231
3  815631613 331
3  820631613 531
3  841631613 431
3  832631612 131
3  817631613 131
3  838631613 931
3  832631613 531
3  828631613 131
3  822631611 131
3  810631611 131
1  931412813 533
1  932412812 133
1  917412813 133
1  930412813 533
1  926412812 133
1  927412813 533
1  943412812 533
1  930412812 533
1  912412811 133
1  9294128131133
1  940412812 133
1  947412812 133
1  923412813 133
1  944412812 133
1  933412812 133
1  932412813 533
1  932412812 133
1  930412813 533
1  920412812 633
1  939412812 133
1  922412811 133
1  954412812 133
1  934412813 533
1  918412813 133
1  921412812 533
1  936412812 133
1  9424128121133
1  939412812 133
1  922412813 133
1  935412812 133
1  914412812 133
1  913412811 533
1  928412813 533
1  911412811 133
1  910412811 133
1  9184128131133
1  919412813 133
1  929412813 533
1  921412812 133
1  916412811 133
1  927412813 133
1  920412812 133
1  918412811 533
1  926412812 133
1  927412813 133
1  922412813 133
1  9274128121133
1  932412812 133
1  924412813 933
1  9334128121133
1  935412813 133
1  926412811 133
1  932412813 133
1  916412811 133
1  918412813 133
1  934412812 133
1  936412813 133
1  9 5412813 133
1  927412813 133
2  937493913 533
2  944493912 533
2  931493913 533
2  931493912 533
2  919493913 133
2  944493912 133
2  921493913 133
2  939493912 133
2  920493913 533
2  928493912 133
2  933493913 133
2  928493912 133
2  936493913 133
2  9294939111133
2  938493912 533
2  9484939131133
2  912493911 133
2  932493913 133
2  930493912 133
2  9234939131133
2  949493912 133
2  928493913 533
2  919493913 133
2  929493912 133
2  932493913 533
2  930493912 133
2  917493912 133
2  930493912 133
2  938493912 533
2  914493912 533
2  926493913 133
2  928493913 133
2  9214939121133
2  918493912 133
2  929493912 133
2  949493912 233
2  933493913 133
2  941493912 133
2  918493912 133
2  9 6493913 133
2  943493912 133
2  948493912 133
2  937493913 133
2  942493912 533
2  946493912 533
2  9334939121133
2  9 5493913 133
2  9544939121133
2  940493912 533
2  944493912 833
2  933493913 533
2  910493912 533
2  9244939131133
3  942493612 133
3  941493612 133
3  935493613 133
3  924493613 133
3  929493613 133
3  953493612 133
3  932493613 133
3  934493612 533
3  924493613 133
3  931493613 933
3  910493613 133
3  920493613 133
3  923493613 133
3  941493612 133
3  928493613 133
3  9 1493613 133
3  951493612 133
3  951493612 133
3  9274936131133
3  928493613 533
3  919493613 133
3  930493613 133
3  931493613 133
3  931493613 133
3  929493613 533
3  916493613 533
3  923493613 133
3  947493612 133
3  930493613 133
3  914493611 133
3  924493612 133
3  928493613 133
3  911493611 133
3  945493612 133
3  929493612 133
3  924493611 133
3  9524936121133
3  9 7493611 533
3  925493613 133
3  954493612 133
3  9 6493611 533
3  917493612 133
3  914493611 533
3  948493612 133
3  937493612 133
3  953493612 133
3  9214936131133
3  916493611 133
1 1011182803 113
1 1015182802 113
1 1042182803 113
1 1017182802 113
1 10301828131113
1 1012182813 113
1 1014182802 113
1 10211828031113
1 10 31828111113
1 10 11828031113
1 1040182812 913
1 1013182812 113
1 10311828131113
1 1012182803 113
1 10 2182813 113
1 1052182812 113
1 1023182812 113
1 1019182813 913
1 1019182811 113
1 1030182803 113
1 1038182802 113
1 10 9182813 213
1 1042182812 113
1 1025182803 113
1 1024182803 113
1 1016182811 113
1 10391828131113
1 10161828031113
1 1014182811 113
1 1025182802 113
1 1010182801 913
1 1017182802 113
1 1013182811 113
1 1026182812 113
1 1031182813 113
1 1052182802 113
1 1033182813 113
1 1048182812 113
1 1042182802 713
1 1025182812 113
1 1013182811 113
1 1017182813 113
1 1027182802 113
1 1019182803 113
1 1013182803 713
1 1028182813 513
1 1010182803 113
1 1020182813 113
1 1040182812 113
1 1041182803 113
1 1036182812 113
1 10 8182813 113
1 1020182803 113
1 1031182812 513
1 1027182813 113
1 10 3182812 113
1 10 9182802 113
1 1018182813 113
1 1038182813 113
1 1041182802 113
1 10241828111113
1 1015182803 113
1 1027182812 113
1 1037182802 113
1 1021182803 113
1 1045182813 513
1 1015182803 113
1 1031182813 113
1 1020182803 213
1 1018182812 113
1 1039182812 113
1 10391828121113
1 1031182813 713
1 1014182803 113
1 1017182803 113
1 1048182802 113
1 10 2182801 113
1 1022182812 813
1 1021182803 113
1 1034182803 113
1 1041182813 113
1 10 4182802 113
1 1017182803 113
1 1013182802 113
1 1029182813 113
1 10 8182813 113
1 1021182803 113
3 1035392802 113
3 10243928111113
3 1035392813 113
3 1027392803 113
3 1042392812 113
3 10 13928111113
3 10263928131113
3 1022392812 113
3 10 3392803 113
3 1042392803 113
3 1031392803 113
3 1053392812 113
3 1044392813 113
3 1052392802 113
3 1029392802 113
3 10343928121113
3 1011392811 113
3 1027392803 113
3 10413928021113
3 10203928111113
3 10273928011113
3 10 73928131113
3 1046392801 213
3 1012392813 113
3 10473928031113
3 1041392812 113
3 10233928131113
3 1038392812 113
3 1035392802 113
3 1014392802 113
3 1041392802 713
3 1045392802 113
3 10 73928031113
3 10223928121113
3 1029392802 513
3 10373928121113
3 1039392813 113
3 10523928021113
3 1017392811 113
3 1049392802 113
3 1027392813 113
3 1015392801 513
3 1042392802 113
3 10443928031113
3 1018392811 113
3 10 2392801 913
3 1055392812 113
3 1048392803 713
3 10303928131113
3 10563928021113
3 1035392813 113
3 1022392813 113
3 1022392803 513
3 1010392803 113
3 1011392803 113
3 10 2392801 113
3 1050392812 113
3 10213928021113
3 1013392803 113
3 10133928011113
3 1038392802 113
3 1044392813 113
3 1024392813 113
3 1019392813 113
3 1046392812 913
3 10 2392801 113
3 1048392812 113
3 1022392813 113
3 10523928121113
3 10 9392813 513
3 1037392813 113
3 10383928121113
3 1045392802 113
3 1033392812 113
3 1042392811 113
3 1045392812 113
3 1033392813 113
3 1032392813 113
3 1027392803 113
3 1030392813 713
3 1022392813 513
3 1047392802 113
3 1038392802 113
3 1025392801 713
3 10223928031113
3 10233928131113
3 1021392803 113
3 1026392813 113
3 1037392803 513
3 1028392813 113
3 1048392803 113
3 10 8392803 113
3 10163928011113
3 10433928131113
3 1025392813 113
1 11182828131112
1 1126282803 512
1 1145282802 112
1 11 8282803 112
1 1138282802 112
1 1141282812 112
1 1112282803 112
1 1116282813 112
1 11 5282801 512
1 1116282803 112
1 11 9282813 112
1 11 2282811 112
1 1122282813 112
1 1115282801 112
1 11 9282813 112
1 1113282813 112
1 1129282812 112
1 11 3282803 112
1 1129282813 112
1 11452828121112
1 1114282803 112
1 1128282813 112
1 11 8282813 112
1 1125282803 512
1 1116282813 112
1 11202828031112
1 11 1282811 112
1 1139282813 112
1 1124282802 112
1 11102828031112
1 1120282802 112
1 1113282811 512
1 1123282802 112
1 1122282813 512
1 1116282813 112
1 11 8282813 112
1 1130282812 112
1 1120282802 112
1 1112282813 112
1 1147282812 112
1 1126282802 112
1 1139282802 112
1 11 3282813 112
1 1143282802 112
1 1110282803 112
1 1117282803 112
1 1117282813 512
1 1114282811 112
1 1117282803 112
1 1120282811 512
1 1129282813 112
1 1118282813 112
1 1124282812 112
1 11 9282813 112
1 1112282813 512
1 1137282812 112
1 1111282811 112
1 1114282813 512
1 11 2282813 112
1 11 7282811 112
1 1128282802 112
1 11 6282801 112
1 1128282802 112
1 1115282813 512
1 1131282812 512
1 1124282812 112
1 1121282813 112
1 1116282811 112
2 1112382713 112
2 1138382712 112
2 1135382702 912
2 1145382702 712
2 1120382702 112
2 11 5382701 112
2 11 4382703 112
2 11 9382702 112
2 1148382712 512
2 1131382712 112
2 1114382712 112
2 1111382712 112
2 1121382712 112
2 1124382713 112
2 11 9382713 112
2 1111382713 112
2 1135382703 212
2 1114382703 112
2 11 4382703 112
2 1118382702 112
2 1115382703 112
2 1122382713 112
2 1134382702 112
2 11 4382711 112
2 1141382712 112
2 1110382713 112
2 11 5382713 112
2 11 2382713 112
2 1146382713 112
2 1112382703 112
2 1131382712 512
2 11 2382711 112
2 1110382703 112
2 1118382703 512
2 11 1382701 112
2 11 4382703 112
2 11 1382711 112
2 11 2382711 112
2 1112382711 112
2 1133382712 512
2 11 4382703 112
2 1138382713 512
2 11 7382711 112
2 1152382712 712
2 1115382702 112
2 1142382712 112
2 1144382712 112
2 1126382712 112
2 1149382712 112
2 1122382703 112
2 1110382713 512
2 1128382703 112
2 1110382713 112
2 1119382703 112
2 1115382713 112
2 1125382713 112
2 11 2382713 112
2 1146382712 112
2 1125382712 112
2 1131382711 712
2 1115382703 112
2 1115382703 112
2 11 9382713 112
2 1147382712 112
2 11 4382701 112
2 11 6382713 112
3 11173827031112
3 1113382712 112
3 1117382713 112
3 1154382712 112
3 1129382713 112
3 1121382713 112
3 1120382703 112
3 11 7382711 112
3 1126382713 512
3 1119382712 112
3 1155382702 112
3 1110382701 112
3 1129382713 112
3 1128382713 112
3 1113382703 112
3 1121382701 112
3 1113382711 512
3 1127382713 112
3 1110382701 712
3 11 5382701 112
3 11 2382701 212
3 11 4382711 112
3 11383827121112
3 11 6382703 112
3 11 8382713 112
3 1120382713 112
3 1127382713 112
3 1112382701 112
3 1123382713 512
3 1111382701 112
3 1136382713 512
3 1122382703 712
3 1123382712 112
3 11 9382711 112
3 1123382713 112
3 1155382712 112
3 11 5382701 112
3 1132382713 212
3 1121382713 112
3 1126382712 112
3 11 83827031112
3 1129382712 112
3 1144382703 912
3 11 3382712 112
3 1119382713 512
3 1120382702 112
3 1137382703 112
3 1125382702 112
3 1129382713 512
3 1131382703 112
3 11 5382711 112
3 11 4382701 112
3 1122382713 512
3 1121382713 512
3 1132382702 112
3 1143382702 112
3 1128382702 112
3 1130382713 912
3 1124382702 112
3 1113382713 112
3 1129382712 112
3 1113382711 112
3 1149382702 112
3 1125382702 112
3 1125382703 712
3 1111382713 112
3 1119382713 112
3 1114382711 112
3 1111382713 112
3 1134382712 112
3 1134382703 912
3 1132382703 112
3 1141382712 112
3 1126382712 112
3 1137382713 112
3 1141382713 112
3 11 8382701 112
3 1136382702 112
3 1133382703 112
3 1120382703 512
3 1116382703 112
1 12 7332201 113
1 1219332203 113
1 12223322021113
1 12413322121113
1 1212332201 113
1 12 8332213 113
1 12 1332203 113
1 12173322131113
1 12113322131113
1 12 7332211 113
1 1221332201 113
1 1235332212 113
1 1218332213 113
1 12 2332201 113
1 1215332202 513
1 1226332202 113
1 1238332213 113
1 1233332212 113
1 1210332203 113
1 1223332213 513
1 1243332212 713
1 1237332212 113
1 1217332203 113
1 1225332213 113
1 1221332213 113
1 1225332203 113
1 1228332203 613
1 12323322031113
1 1212332203 113
1 1241332202 113
1 1225332201 513
1 1233332213 513
1 1215332203 713
1 1224332201 113
1 1235332213 113
1 1216332203 113
1 1228332203 113
1 1218332201 113
1 1227332213 513
1 1218332203 113
1 1225332213 113
1 1213332213 113
1 1219332201 113
1 1211332201 113
1 1221332213 113
1 12433322121113
1 1219332201 513
1 12 8332203 113
1 1242332213 113
2 1228381612 113
2 1236381613 113
2 12 6381601 113
2 1217381613 113
2 12 2381603 513
2 1234381603 113
2 1218381603 513
2 1242381603 613
2 1230381603 113
2 12 7381601 513
2 12 3381603 113
2 12 3381613 113
2 1210381603 113
2 1216381613 913
2 12 2381601 113
2 1245381603 113
2 1220381613 113
2 1249381612 713
2 12213816131113
2 1230381603 513
2 1241381602 113
2 1214381602 513
2 1215381613 113
2 1248381602 513
2 12203816131113
2 12173816031113
2 1221381613 113
2 1241381612 113
2 12 9381601 113
2 12 5381601 513
2 1217381603 613
2 12 7381601 113
2 1233381603 113
2 1241381612 113
2 1226381612 113
2 1232381613 113
2 12 7381603 513
2 1215381603 113
2 1220381613 113
3 12333822031113
3 12 3382203 113
3 1257382212 113
3 1251382203 213
3 1225382213 113
3 1249382202 113
3 1241382212 113
3 1243382212 513
3 1225382213 113
3 1235382202 113
3 1218382213 113
3 1251382212 513
3 1211382213 113
3 12 6382201 113
3 1222382213 513
3 12 8382201 113
3 1212382201 113
3 1221382203 113
3 12 8382211 513
3 1247382203 113
3 1217382203 113
3 12 4382201 513
3 1225382203 113
3 12613822021113
3 1236382203 113
1 1316511403 121
1 13 7511403 121
1 13305114021021
1 13 8511403 421
1 13 4511403 121
1 1325511402 421
1 13 9511401 421
1 13 9511401 721
1 13 5511403 521
3 1318651302 121
3 13 2651303 121
3 1310651303 721
3 1311651301 121
3 1319651301 921
3 1323651302 121
3 13 4651303 421
3 13 1651301 121
3 13 7651302 321
3 13 6651303 421
3 1330651303 121
3 1318651303 421
3 13 6651302 121
3 13 3651301 121
3 1317651303 421
3 13 5651301 521
3 1452463302 123
3 1417463302 123
3 1435463302 123
3 14 4463303 123
3 14134633031123
3 1450463302 123
3 14294633021123
3 14 3463303 523
3 1433463303 523
3 1416463303 123
3 1420463303 123
3 14 7463301 123
3 1428463302 123
3 1432463302 123
3 14 34633031123
3 1419463303 123
3 1424463302 123
3 1422463302 123
3 1442463302 123
3 1424463302 223
3 14 8463302 123
3 14504633021123
3 14 1463301 123
3 1414463302 523
3 1421463303 123
3 14 84633031123
3 14374633021123
3 14 9463302 523
3 1410463303 123
3 1436463302 123
3 1415463301 123
3 14 6463301 523
3 1415463302 123
3 1417463303 123
1 1515182411 131
1 1535182413 131
1 1526182413 131
1 1543182413 531
1 1545182412 731
1 1525182413 631
1 1544182412 131
1 1527182413 131
1 1530182413 131
1 1529182413 631
1 15401824121131
1 1524182413 131
1 1524182413 131
1 1511182411 131
1 1528182413 131
1 1513182411 131
1 1537182413 131
1 1532182413 131
1 1513182413 131
1 1543182412 131
1 15 6182413 131
1 1512182411 631
1 1537182412 131
1 1527182413 131
1 1522182413 131
1 1541182412 131
1 1530182413 131
1 15261824111131
1 1549182412 131
1 1510182411 131
1 15161824131131
1 1550182412 131
1 1531182413 231
1 1520182413 131
1 1534182413 131
1 1551182412 131
1 1519182413 131
1 1523182411 131
1 1551182412 131
2 1514342613 131
2 1548342613 131
2 15 5342611 131
2 1541342612 131
2 1522342612 131
2 1510342612 131
2 1529342613 131
2 1538342612 531
2 1543342612 131
2 1524342613 131
2 1544342613 131
2 15163426111131
2 1547342613 131
2 1542342612 131
2 1542342612 131
2 1545342612 131
2 15 93426111131
2 1536342612 131
2 1525342613 131
2 1536342613 131
2 1533342612 131
2 1548342612 131
2 1529342613 731
2 1531342613 131
2 1511342611 131
2 1536342613 131
2 1530342612 131
2 15 5342613 131
2 1530342611 631
2 15 2342611 131
2 1539342612 131
2 1514342613 131
2 1525342613 231
3 1537343413 131
3 1546343412 131
3 1539343412 131
3 1531343413 131
3 1525343411 131
3 1526343413 531
3 1537343413 131
3 1525343413 131
3 1556343412 131
3 15 3343413 131
3 15453434131131
3 1532343413 131
3 1539343412 131
3 1532343413 131
3 15 7343413 131
3 1535343413 131
3 1535343413 231
3 15 73434111131
3 1545343413 731
3 1527343411 131
3 15293434131131
3 1540343412 131
3 1536343411 131
3 1554343412 131
3 15463434131131
3 1546343412 131
3 1538343413 131
3 15193434131131
3 1541343412 731
3 15543434121131
3 1528343413 131
3 1530343413 231
3 1530343413 531
3 1525343413 131
3 1533343413 131
3 1552343412 131
3 15503434121131
3 1519343413 131
1 1616451303 111
1 1619451313 111
1 16 3451311 111
1 1615451313 111
1 1611451302 111
1 1613451313 511
1 1612451302 111
1 1611451303 111
1 16 9451302 111
1 1616451303 111
1 1610451313 111
1 16 8451313 111
1 16 5451302 111
1 16 8451313 111
1 1615451303 111
1 1616451313 111
1 16 8451301 511
1 16 1451313 511
1 1618451303 511
1 16114513111011
1 1625451312 111
1 1618451303 111
1 1624451303 511
1 16 2451303 111
1 16 8451311 111
1 1618451313 111
1 1627451303 511
1 1631451313 111
1 1617451302 111
1 1610451311 511
1 16 4451303 111
1 16 1451311 511
1 1617451313 511
1 1627451313 511
1 16 4451301 111
1 1618451311 511
1 1611451302 111
1 16 8451301 511
1 1616451303 111
1 1613451301 111
1 1626451312 111
1 16 1451303 111
2 16 6581801 111
2 1612581803 111
2 1627581813 511
2 1614581803 111
2 1625581803 111
2 1610581803 111
2 1623581813 111
2 16 9581801 511
2 1635581812 911
2 1632581813 511
2 1617581802 111
2 16305818131111
2 16 6581802 111
2 16 8581803 111
2 1617581803 111
2 16 9581803 111
2 16 1581801 111
2 1619581813 511
2 1625581803 111
2 16 3581801 111
2 1625581812 511
2 1610581803 511
2 16 8581803 511
2 16 5581801 111
2 16 9581803 511
2 16 2581811 111
2 1618581802 111
2 16 9581803 111
2 1613581811 111
2 1625581802 111
2 1612581812 111
2 1637581812 111
2 16 25818131111
2 16 3581801 511
2 16 8581812 111
2 16 2581803 111
2 1623581802 511
2 16 8581813 511
3 16 9581713 111
3 1613581713 111
3 1621581703 111
3 1631581712 111
3 1618581713 111
3 16 4581703 511
3 16 2581703 111
3 1611581703 511
3 1614581703 111
3 1627581702 111
3 1637581712 511
3 1622581702 111
3 1633581703 111
3 1616581703 111
3 1616581701 111
3 1616581703 511
3 1637581713 511
3 1623581713 111
3 16 9581703 111
3 1615581703 111
3 1628581712 111
3 1639581702 111
3 1626581711 511
3 16315817031011
3 16 6581701 111
3 16 7581713 111
3 1625581713 111
3 16 2581711 111
3 1617581713 111
3 1623581713 111
3 1627581713 511
3 16 3581701 111
3 1621581702 111
3 1623581703 111
3 1624581703 111
3 1626581713 211
3 1628581713 511
3 1626581702 211
3 1615581713 111
3 16 4581711 111
3 1618581703 111
3 1613581703 111
3 1627581712 111
1 17 5342201 123
1 1736342202 123
1 17253422031123
1 17 5342203 523
1 1718342203 123
1 17113422021123
1 17343422021123
1 17 83422031123
1 1730342202 623
1 17 5342203 523
1 1724342203 123
1 1726342203 123
1 17 1342201 123
1 1712342202 123
1 1712342203 123
1 17 1342203 123
1 1711342203 523
1 17 13422011123
1 1722342203 123
1 17153422031123
1 17 3342201 523
1 17 93422011123
1 1722342202 123
1 17183422011123
1 17 8342201 123
1 17 73422031123
1 17 6342203 123
1 1732342202 123
1 1735342202 123
1 1720342203 523
1 17 3342203 123
1 17 8342202 123
1 1728342203 123
1 1711342201 523
1 17 2342203 523
1 17183422011123
1 17 2342203 123
1 17343422021123
1 1715342201 123
2 17 8432101 123
2 17 5432103 123
2 1718432102 123
2 1725432102 123
2 17 3432101 523
2 17194321011123
2 17134321031123
2 17254321021123
2 17174321021123
2 1724432102 523
2 17374321021123
2 17 9432103 123
2 17304321021123
2 1720432102 123
2 17174321031123
2 17 3432103 123
2 1729432102 123
2 17 2432102 123
2 1714432103 123
2 1713432103 123
2 1721432102 623
2 1710432101 123
2 17 9432103 523
2 17 5432101 523
2 1730432102 123
2 17 7432101 523
2 17 2432101 523
2 1721432103 123
3 1716431603 523
3 1720431603 123
3 1715431603 123
3 17104316031123
3 17 64316011123
3 1727431603 523
3 17154316031123
3 17134316031123
3 1729431602 123
3 17494316031123
3 17 4431602 123
3 17154316021123
3 1735431603 123
3 1720431603 123
3 1719431602 123
3 17 5431603 123
3 1736431602 523
3 1716431603 123
3 1711431603 123
3 17 5431601 123
3 1713431602 123
3 1712431603 123
3 1723431603 123
3 1724431602 123
3 17 6431603 123
3 1730431602 123
3 1719431603 123
3 17 5431603 523
3 1716431603 523
3 1711431603 123
3 17244316031123
3 17254316031123
3 17 8431603 123
3 1713431601 523
3 1729431603 523
3 17 9431603 123
1 1816482313 113
1 1834482302 513
1 18274823131113
1 1812482302 113
1 1837482302 113
1 18204823131113
1 1828482302 113
1 1827482311 513
1 1817482303 513
1 1834482302 113
1 18 3482313 113
1 1819482301 513
1 18 9482303 513
1 18224823131113
1 1848482302 113
1 18304823021113
1 18 8482303 113
1 1826482303 513
1 1832482312 113
1 1829482303 513
1 18154823011113
1 1838482313 113
1 1827482303 113
1 1823482313 113
1 1819482313 513
1 18 2482313 113
1 1838482302 513
1 1811482303 113
1 1823482302 213
1 1831482312 513
1 1824482312 513
1 1824482312 513
1 1833482312 113
1 18274823131113
1 1831482313 513
1 1836482303 113
1 18174823031113
1 1823482311 613
1 1824482301 513
1 1828482313 113
1 1815482313 113
1 1819482311 513
1 18 84823111113
1 1835482303 113
1 1817482303 113
1 18174823031113
1 18174823131113
1 1825482303 713
1 1829482313 513
1 1825482313 513
1 18104823131113
1 18 9482301 113
1 1824482313 213
1 1831482303 113
1 1843482312 113
1 18344823121113
1 18394823121113
1 18424823131113
1 18 8482301 113
1 18 6482302 113
1 1810482301 113
1 1812482303 113
1 1826482312 513
1 1823482302 113
1 1829482312 113
2 18 8421511 513
2 1817421501 513
2 1822421503 113
2 1826421513 513
2 1815421503 513
2 18 5421511 513
2 1816421501 513
2 1845421503 713
2 18 6421501 113
2 1810421503 113
2 1819421513 513
2 1815421503 513
2 1843421512 113
2 18 9421511 513
2 1830421503 713
2 18 6421501 513
2 1812421511 113
2 1813421511 113
2 1822421513 513
2 1810421503 113
2 1813421511 513
2 1819421511 513
2 18 3421501 513
2 1812421501 513
2 1810421503 113
2 1813421513 513
2 1842421513 113
2 18124215031113
2 18244215011113
2 1818421502 513
2 1840421513 513
2 1841421512 113
2 1819421503 513
2 1819421513 513
2 1824421513 513
2 1810421503 113
2 1831421503 113
2 1860421502 113
2 18 6421511 513
2 1835421512 113
2 1825421503 513
2 1828421513 513
2 18 9421501 513
2 18 6421501 513
2 1825421513 213
2 1837421502 113
2 1838421501 113
2 1822421513 113
2 18244215131113
2 1839421512 113
2 18 9421503 113
2 18394215021113
2 1850421512 213
2 1810421503 513
2 1836421513 513
2 1820421513 513
3 1816422003 113
3 1821422013 513
3 1818422013 113
3 18 7422001 513
3 18264220131113
3 1828422012 513
3 1830422012 513
3 1818422001 513
3 1816422011 113
3 1817422013 513
3 18324220031113
3 18454220131113
3 18 4422003 513
3 1826422013 113
3 1816422011 113
3 1810422011 513
3 1831422013 213
3 18 7422001 513
3 1813422001 113
3 18484220021113
3 1819422013 113
3 1819422013 513
3 1821422013 113
3 18224220031113
3 1839422003 113
3 1819422002 513
3 1832422003 113
3 1828422013 113
3 18 4422001 113
3 1847422012 113
3 1835422003 113
3 1821422003 813
3 18 9422001 113
3 1815422011 113
3 1823422012 113
3 1833422013 113
3 1854422013 513
3 1827422003 113
3 1818422003 513
3 1819422003 513
3 1817422013 113
3 1827422013 113
3 1810422003 513
3 1840422012 113
3 18 2422003 113
3 18234220031113
3 1825422012 513
3 18 74220031113
3 1831422002 513
3 1816422013 113
3 1814422013 513
3 1829422011 113
3 1814422003 513
3 1828422012 113
3 1816422011 513
3 1821422013 113
3 1816422003 713
3 18294220021113
3 1814422001 113
3 1846422002 113
3 1814422013 513
1 1932142303 123
1 1915142303 123
1 1916142303 123
1 1919142303 123
1 1937142303 123
1 1914142303 523
1 1935142302 123
1 1919142302 123
1 1928142302 123
1 1942142302 123
1 1939142302 123
1 1924142303 223
1 1923142303 123
1 1945142302 123
1 1922142303 123
1 19261423031123
1 1913142303 123
1 1937142303 123
1 1917142303 323
1 19421423031123
1 1927142303 123
1 1916142303 123
2 1911112403 123
2 1924112403 123
2 1919112402 523
2 1934112403 123
2 1918112402 123
2 1933112403 123
2 1936112402 123
2 1930112403 523
2 19 5112403 123
2 19211124031123
2 1922112402 123
2 19401124011123
2 1935112403 123
2 1922112403 123
2 1931112403 123
2 19221124021123
2 19 9112401 123
2 1934112402 123
2 1927112403 123
2 1926112402 123
2 1923112403 523
2 19441124031123
2 1925112402 123
2 19311124031123
2 1912112401 523
2 1934112402 123
2 1927112402 123
2 1932112403 523
2 1934112403 123
2 19251124031123
2 1933112403 523
2 1939112402 123
2 1930112402 123
2 19381124021123
2 1921112403 123
2 19321124031123
2 1919112403 123
2 19241124031123
2 1937112402 123
2 1924112403 123
3 1918112602 123
3 19121126011123
3 1943112603 523
3 19201126031123
3 1930112603 123
3 19 2112601 123
3 1927112603 123
3 1933112601 123
3 19371126031123
3 1939112602 123
3 1923112601 123
3 19481126031123
3 1935112602 123
3 1939112602 123
3 1938112602 123
3 1926112603 123
3 1930112603 123
3 1937112603 123
3 1927112603 123
3 1928112602 123
3 19351126011123
3 1938112603 123
3 1925112603 123
3 1935112602 123
3 1936112603 123
3 1916112603 123
3 1930112601 523
3 19311126031123
3 1938112602 123
3 1928112603 123
3 1928112603 523
3 1929112602 123
3 1916112603 123
3 1910112603 123
3 1930112602 123
3 1933112602 123
3 1934112602 123
3 1938112602 123
3 1934112602 123
3 1932112603 123
3 1932112603 123
3 1926112603 123
3 1931112603 123
3 1940112602 123
3 1933112603 723
1 2050282403 421
1 2029282403 121
1 2026282403 921
1 2010282403 121
1 2026282402 121
1 2043282402 121
1 2015282402 121
1 20302824031021
1 20 2282403 121
1 20 7282401 121
1 20 8282403 121
1 2051282402 121
1 2043282402 521
1 2010282403 121
1 2014282403 121
1 2015282403 121
1 2027282403 121
1 20 9282403 521
1 20 32824011021
1 2010282403 521
1 2018282402 121
1 2012282403 121
1 2022282403 521
1 20252824021021
1 20 6282401 521
1 20 7282401 121
1 20 6282401 521
1 2021282402 521
1 2026282403 121
1 20 7282403 121
1 2015282403 121
1 20 5282403 121
1 2017282402 121
1 20 2282402 121
1 2040282403 121
1 20 9282403 121
1 2016282403 121
1 20 1282401 121
1 2054282402 121
1 2036282402 521
1 2031282402 521
1 2025282403 121
1 20 8282401 521
1 2046282402 121
1 20 6282401 121
1 2017282403 521
1 2014282401 121
1 2010282401 521
1 2036282402 121
1 20 6282401 121
1 2033282402 121
1 2026282403 121
1 20 9282401 121
1 20 1282403 121
1 2035282402 121
1 2012282403 521
2 2010381603 121
2 2015381601 121
2 2012381603 121
2 2021381602 521
2 2018381603 421
2 20 4381601 121
2 2026381602 121
2 2013381603 121
2 20 7381601 121
2 2039381603 121
2 20 5381603 121
2 20 1381601 121
2 20 1381602 121
2 2012381603 521
2 2017381603 121
2 20 9381601 121
2 2013381601 521
2 20 7381603 521
2 2015381603 121
2 2015381603 521
2 2049381602 121
2 20 5381603 121
2 2022381603 121
2 2014381603 521
2 2012381603 121
2 2023381603 121
2 20 6381601 521
2 20 6381602 121
2 2027381603 121
2 20 1381601 521
2 20 4381601 521
2 2026381603 121
2 2027381603 121
2 2026381602 121
2 2014381603 521
2 2012381603 521
2 2013381603 121
2 2015381603 121
2 2010381601 521
2 2013381603 121
2 2013381603 521
2 20 7381602 121
2 20 3381603 521
2 20 3381601 121
2 20 7381603 121
3 20 1382801 521
3 2011382803 121
3 2032382802 121
3 2019382803 521
3 20 53828011021
3 2040382802 121
3 20 8382803 221
3 20 8382803 121
3 20 6382803 121
3 2011382801 121
3 2022382803 521
3 20 3382803 121
3 2015382803 121
3 20 7382803 121
3 20 4382802 721
3 20 4382803 121
3 20 8382803 121
3 20 2382801 521
3 20 5382802 121
3 20 7382803 121
3 20 5382803 121
3 20 5382801 521
3 2028382802 121
3 20 2382803 121
3 2030382802 121
3 2016382802 121
3 2016382803 121
3 2014382803 121
3 2027382802 121
3 2011382803 121
3 2043382802 121
3 2027382802 521
3 2045382802 521
3 2015382802 521
3 20 9382803 521
3 2018382803 121
1 2141282202 121
1 2118282202 121
1 2113282203 521
1 2123282202 121
1 2111282202 121
1 2136282202 121
1 21 1282203 121
1 2145282202 121
1 21 2282203 121
1 2126282202 121
1 2117282203 121
1 21 9282203 121
1 21 6282203 121
1 21 1282202 121
1 2125282203 121
1 2113282203 121
1 21 9282203 121
1 2113282203 521
1 21 9282201 121
1 2116282202 121
1 21 4282201 121
1 21132822011021
1 2111282203 121
1 2123282203 121
1 21 1282201 121
1 21 9282201 521
2 2121402002 121
2 21 44020031121
2 2135402002 121
2 2115402001 121
2 2116402001 121
2 2119402001 121
2 21 4402003 521
2 2113402003 121
2 2111402003 121
2 21 3402003 521
2 2119402003 521
2 21 7402003 121
2 21 1402003 121
2 2138402002 121
2 2115402003 521
2 2111402003 121
2 2133402003 121
2 2112402001 121
2 21 9402001 121
2 2114402003 521
2 21 3402003 521
2 2129402003 121
2 2127402003 721
2 21434020021021
2 2115402002 121
2 2124402003 121
2 2110402002 521
2 21 6402003 121
2 21134020031121
2 2114402003 121
2 2123402002 121
2 21 4402002 121
2 21 3402003 521
2 2141402002 121
2 2121402003 121
2 2120402002 121
3 2112402003 121
3 2119402003 121
3 21 7402003 121
3 2118402003 121
3 2115402003 121
3 21 24020011021
3 2116402001 521
3 21 9402001 121
3 2114402003 121
3 21214020021021
3 2133402001 421
3 2133402002 121
3 2125402003 721
3 2119402002 121
3 2112402002 121
3 2123402003 121
3 21 6402003 121
3 2123402002 121
3 2122402002 121
3 2111402002 121
3 2140402002 121
3 2132402003 121
3 21 3402001 521
3 2111402003 121
1 2221271612 132
1 2211271612 532
1 2221271613 132
1 22 2271611 532
1 22 8271611 532
1 2212271611 532
1 22 9271611 532
1 2214271611 132
1 2230271612 132
1 2212271613 132
1 2211271611 532
1 22 9271613 132
1 22 9271613 532
1 2233271613 632
1 22 8271613 532
1 2210271613 532
1 2231271613 132
1 2212271611 532
1 22 6271613 132
1 2233271612 532
1 22 3271613 132
1 2245271612 132
1 2210271613 132
1 2217271612 132
1 2229271612 132
1 2231271613 232
3 22 1572113 132
3 2219572113 532
3 22 9572111 532
3 2215572113 532
3 2214572111 132
3 22355721131132
3 2216572113 132
3 2227572113 132
3 2218572113 132
3 2212572111 532
3 2212572111 632
3 2238572113 132
3 2214572111 532
3 2232572113 532
3 2218572113 532
3 2233572113 532
3 2221572111 532
3 2221572113 532
3 2235572112 532
1 23212416111112
1 23 52416031112
1 2320241613 512
1 2316241613 112
1 23 6241603 112
1 2339241602 112
1 2334241612 512
1 2324241603 512
1 23 4241601 112
1 2316241613 112
1 23232416131112
1 2318241612 112
1 2319241613 512
1 2322241602 112
1 23512416121112
1 2346241612 112
1 2332241613 512
1 2335241602 112
1 23232416111112
1 23462416121112
1 2321241603 612
1 2314241613 512
1 2338241613 112
1 23332416021112
1 23 4241601 512
1 2344241602 912
1 2325241603 112
1 2331241601 212
1 2322241613 112
1 2317241612 512
1 2317241613 112
1 2315241602 112
1 23112416011112
1 23 2241603 112
1 2343241612 112
1 2318241603 112
1 2328241613 112
1 23 1241613 112
1 23122416021112
1 2324241602 112
2 2318281913 512
2 23142819131112
2 2341281912 112
2 23 8281913 112
2 23 5281903 512
2 2321281913 112
2 2346281902 112
2 23 4281903 512
2 23 8281913 112
2 2328281903 512
2 2334281913 712
2 23142819031112
2 2339281912 112
2 23 8281903 112
2 2344281912 112
2 2322281902 112
2 23572819021112
2 23 7281913 512
2 23 3281903 112
2 2350281912 212
2 2324281913 112
2 2314281911 112
2 2322281912 512
2 2345281912 112
2 23 2281902 112
2 2312281912 112
2 2321281913 512
2 2318281913 112
2 23 3281901 512
2 23382819131112
2 23 4281911 512
2 2328281903 112
2 2332281913 712
2 2312281903 512
2 2315281903 112
2 23122819011112
2 23 92819031112
2 2355281912 712
2 23 8281903 112
2 23 7281913 112
3 23172831121112
3 2342283102 912
3 2328283103 112
3 2334283103 112
3 2319283103 112
3 2310283111 512
3 23 92831011112
3 2344283113 112
3 2340283102 112
3 23 3283103 112
3 2322283103 512
3 2332283113 112
3 2335283112 112
3 2325283103 512
3 2340283102 112
3 2348283102 712
3 23 6283111 112
3 2312283111 512
3 2331283103 112
3 2332283113 912
3 2313283113 112
3 23 2283102 112
3 2331283113 512
3 2353283102 512
3 23262831131112
3 2350283112 112
3 2324283103 112
3 2320283112 112
3 2339283113 112
3 23 2283101 112
3 2325283101 512
3 2353283112 112
3 2331283103 112
3 2313283101 512
3 2319283112 112
3 2317283103 112
3 2322283102 512
3 2326283113 512
3 2333283112 712
3 2332283113 112
3 2347283112 512
3 2316283102 112
3 2343283102 112
3 2329283102 112
3 23 8283101 512
3 23362831031112
3 2334283113 112
3 23 5283113 112
3 2317283113 112
3 2324283113 112
3 23452831021112
3 23 9283103 112
3 2331283112 612
3 2324283113 112
3 2347283112 112
3 23182831111112
3 2311283113 112
3 2320283103 512
3 2327283113 112
3 2336283102 112
3 2336283113 512
3 23 9283113 512
3 2329283113 112
3 2311283101 512
3 2323283102 112
3 2327283113 812
1 2414332813 531
1 2411332813 531
1 2422332813 131
1 2420332813 531
1 2442332813 131
1 2436332813 531
1 2441332812 131
1 2411332813 131
1 2434332812 731
1 2431332813 931
1 2412332813 131
1 24 2332811 131
1 2415332811 531
1 2435332812 131
1 2413332812 131
1 24153328121131
1 2440332812 131
1 2446332813 531
1 2411332813 531
1 2415332812 131
1 24 8332811 131
1 2413332813 131
1 2443332813 131
1 2425332811 931
1 2423332813 131
1 2418332813 131
1 2415332811 531
1 2417332813 131
1 2414332811 131
1 2439332813 831
1 2432332813 531
1 2428332813 131
1 2413332813 531
1 2453332812 531
1 2417332813 531
1 2416332813 531
1 2435332812 131
1 2421332813 131
1 2415332812 131
1 24 6332813 131
1 2440332812 531
1 2412332811 231
1 2432332812 131
1 2427332812 131
1 2419332813 531
1 2417332813 531
1 2420332813 131
1 24263328131131
1 2414332813 131
1 2435332812 131
1 2431332813 131
1 2423332811 531
1 2419332812 131
1 2435332812 531
1 2435332813 231
1 2418332813 131
1 2423332812 131
1 2417332813 531
1 24193328131131
1 2418332813 531
1 2449332812 531
1 2416332813 531
1 2419332813 831
1 24293328131131
1 2431332813 131
1 2423332813 131
1 2431332812 131
1 2410332812 931
1 2416332813 131
1 24 5332812 531
1 2414332813 531
1 2418332812 131
1 2426332812 131
1 24533328121131
1 2415332813 531
1 2413332813 131
1 2449332812 831
1 2431332812 131
2 2422472513 531
2 2423472511 931
2 2427472512 131
2 2427472513 531
2 2433472512 731
2 2417472513 131
2 2414472513 131
2 2427472513 131
2 24344725131131
2 2420472513 431
2 2417472513 131
2 2415472511 231
2 2419472513 531
2 2422472513 131
2 24 2472512 131
2 2415472513 531
2 2419472513 131
2 2419472513 531
2 2419472513 131
2 2423472513 131
2 2435472512 131
2 24 44725111131
2 2423472511 131
2 24 2472511 131
2 2415472513 131
2 2420472513 131
2 2412472513 431
2 2416472513 131
2 2435472512 131
2 2423472513 531
2 2427472513 231
2 2424472513 531
2 2413472511 131
2 24 3472512 531
2 2426472513 531
2 2437472512 531
2 24154725131031
2 24 7472513 231
2 2420472512 531
2 24 6472511 531
2 2432472512 931
2 2414472513 131
2 2426472513 731
2 2422472513 531
2 2425472512 131
2 2415472513 131
2 2419472511 531
2 2423472513 131
2 2415472511 531
2 2420472513 431
2 24194725131131
2 2416472512 531
2 2437472512 831
2 24184725111031
2 2427472512 131
2 2423472513 131
2 2420472513 131
3 2438472512 531
3 24154725111131
3 2438472513 331
3 2432472513 831
3 2424472513 131
3 2421472513 431
3 2416472513 131
3 2418472513 531
3 2442472512 831
3 2428472513 531
3 2435472513 531
3 24 3472511 531
3 2414472513 431
3 2423472513 131
3 24 9472513 131
3 2412472513 531
3 2436472512 131
3 2413472513 531
3 2425472513 131
3 2411472513 131
3 2418472513 131
3 24 2472513 531
3 2447472512 131
3 2426472513 531
3 24 2472513 531
3 2438472512 131
3 24 5472511 531
3 2439472512 131
3 24 4472511 531
3 2425472512 731
3 24 5472511 531
3 2420472513 531
3 2420472513 531
3 2415472511 131
3 24 3472511 531
3 2432472513 131
3 2450472512 131
3 2455472512 131
3 2436472512 131
3 24214725131131
3 2412472513 131
3 2420472511 231
3 2414472513 531
3 2426472512 131
3 24 2472512 131
3 2414472513 531
3 2435472512 831
3 2441472512 131
3 2439472512 531
3 2435472513 131
3 2428472513 531
3 24 6472512 131
3 2417472513 531
3 24 6472513 131
3 2429472513 831
3 24 4472513 131
3 24 7472511 531
3 24 7472511 531
3 2423472513 931
3 2420472511 531
3 2440472512 131
3 2410472513 531
3 2432472513 131
3 2432472513 531
3 2417472513 531
3 2432472512 131
3 253467 913 111
3 251167 913 511
3 252167 913 111
3 25 867 911 111
3 25 467 901 111
3 251667 903 511
3 252667 911 511
3 25 267 901 511
3 251767 912 511
3 252067 913 111
3 251667 913 511
3 251967 903 511
3 25 867 901 211
3 25 567 911 111
3 251567 913 511
3 251167 903 511
3 25 867 913 511
3 251667 913 511
3 25 667 901 511
3 254267 912 211
3 254267 903 911
3 252867 913 511
3 251567 911 511
3 252567 913 511
3 252867 903 711
3 252267 913 111
3 251867 913 511
3 25 667 911 511
3 251467 913 111
3 251867 913 111
3 252567 901 511
3 25 467 913 111
3 25 367 9011111
3 25 467 901 511
3 252167 913 511
3 253067 912 111
3 2628511213 531
3 26 4511213 131
3 26 3511211 131
3 2616511213 131
3 26 9511213 131
3 26 1511211 131
3 26 3511211 131
3 26 5511213 131
3 26235112111031
3 26 8511213 131
3 2624511211 631
3 2641511212 431
3 26 1511211 131
3 26 4511213 131
3 26 2511211 131
3 26475112121131
3 2626511212 131
3 2614511213 431
3 26 8511213 131
3 2638511212 131
3 2622511213 131
3 2616511211 531
3 26125112111031
3 26 65112111031
3 2615511213 131
3 2637511212 531
3 2624511213 131
3 2612511211 131
3 2621511211 131
3 26285112131031
3 2621511213 631
3 2639511213 231
3 26355112131131
3 26 2511213 131
3 2622511212 131
3 26 95112131031
3 2633511213 931
3 26 5511213 131
3 2621511213 531
3 2627511213 131
3 2624511213 131
3 26 7511213 531
3 26285112111131
3 2622511213 131
3 2629511213 531
3 2613511213 131
3 2612511211 131
3 2620511213 131
3 2626511213 931
3 2634511213 131
3 2612511211 131
3 26 3511213 131
3 2617511211 531
3 2617511213 631
3 26 7511211 231
3 2632511213 531
3 2627511213 631
3 2619511212 131
3 26155112111031
3 26 7511213 131
3 2620511211 431
3 2613511213 131
3 2628511212 731
3 2617511212 131
3 2644511213 631
3 2631511213 531
3 26335112131131
2 2716393602 723
2 2719393601 523
2 2713393602 123
2 2715393603 123
2 2738393602 123
2 2730393602 123
2 2730393603 123
2 27 8393602 123
2 27 4393602 123
2 2722393603 123
2 2711393602 123
2 2714393603 123
2 2716393603 123
2 27373936031123
2 2738393602 123
2 2714393603 123
2 2725393603 523
2 27 5393603 123
2 2746393601 223
2 2735393603 123
2 2712393602 123
2 27 6393601 123
2 2718393602 123
2 2733393602 123
2 2713393603 523
2 27 6393603 123
2 2733393603 123
2 2733393602 123
2 2721393602 123
2 27 8393602 523
2 2741393603 123
2 2720393603 523
2 2710393602 123
2 2737393602 123
2 2715393602 123
2 2712393603 523
2 27 5393601 123
2 2710393601 123
2 27 6393601 123
2 2718393602 123
2 2713393602 123
2 2714393603 123
2 27 5393601 723
2 2745393601 123
2 2734393602 123
2 27143936031123
2 2748393602 123
2 2730393603 123
2 2720393603 123
2 2733393602 723
2 2721393602 123
2 2726393602 123
2 2741393602 123
2 27 5393603 123
2 2741393602 123
2 2730393603 123
2 27 4393603 123
2 2710393603 123
2 2716393602 123
2 2733393603 723
2 2723393602 123
2 27 9393601 723
2 2732393602 123
2 2723393603 123
2 2713393602 123
2 27113936031123
2 2727393603 123
2 2717393603 223
2 2733393603 123
2 27 1393603 123
2 27 6393602 123
3 2713393101 123
3 27453931021023
3 2719393103 523
3 2726393102 123
3 27 2393101 523
3 2724393103 123
3 27 4393103 123
3 2732393102 123
3 27 5393103 523
3 27 5393101 123
3 27 7393103 123
3 2716393103 123
3 27243931011123
3 2768393102 723
3 27 4393103 523
3 27423931021123
3 2731393103 123
3 2711393103 123
3 2716393103 123
3 27 63931011123
3 27273931021123
3 2721393103 123
3 2728393103 123
3 27 43931011123
3 2731393103 123
3 2725393102 123
3 27 53931031123
3 27273931011123
3 27 4393101 123
3 2723393103 123
3 2716393101 123
3 27 5393101 123
3 27 8393101 123
3 2714393102 523
3 2720393103 123
3 2718393103 123
3 2725393103 123
3 2728393103 123
3 27 8393102 123
3 27 8393101 123
3 27553931021123
3 2710393102 523
3 27 2393103 123
3 2730393103 123
3 27 8393103 123
3 2761393102 123
3 2753393103 723
3 2750393102 123
3 2742393102 123
3 2715393102 123
3 2725393102 123
3 2725393103 123
3 2710393103 523
3 2726393102 723
3 2744393102 723
3 2758393102 123
3 2712393101 123
3 27 7393101 123
3 2717393103 123
3 27263931021123
3 27333931031123
3 2710393103 123
3 2731393102 123
3 27 3393101 123
3 27183931011123
3 2716393102 123
3 2725393103 523
3 2726393102 123
3 27323931021123
3 2726393103 123
3 2714393103 123
3 2756393103 123
3 2719393103 123
3 2731393103 123
3 2736393102 123
2 2847242312 133
2 28 6242313 133
2 2813242313 133
2 2861242312 133
2 2828242313 133
2 28402423131133
2 2811242311 133
2 28462423121133
2 2845242312 133
2 2819242311 133
2 2824242312 133
2 2813242311 133
2 28542423131133
2 2842242312 133
2 2838242312 133
2 28 4242311 133
2 2825242313 133
2 2853242312 133
2 2846242313 133
2 2862242312 133
2 2855242313 133
2 2819242313 133
2 28602423121133
2 2829242313 133
2 2812242313 133
2 28482423131133
2 2825242312 533
2 2823242313 133
2 2819242313 133
2 28 6242313 133
2 28392423121133
2 28 8242311 133
2 2810242313 133
3 2816242811 133
3 2833242813 133
3 2846242812 133
3 2829242813 533
3 28 4242813 133
3 2812242813 133
3 28372428131133
3 2842242812 133
3 2835242813 533
3 28 9242811 133
3 2842242812 133
3 2841242813 133
3 2835242811 533
3 28302428131133
3 2857242812 133
3 2838242812 133
3 2835242812 133
3 2826242813 133
3 2860242812 133
3 2843242812 133
3 2856242812 133
3 2855242812 133
3 2862242812 133
3 2830242813 133
3 2847242812 133
3 2823242811 933
3 2839242813 533
3 2838242813 533
3 28622428131133
3 2847242812 133
3 2832242813 333
3 28 3242813 133
3 2856242812 133
3 28 4242811 133
3 28502428121133
2 29253725011123
2 2913372503 123
2 2929372503 123
2 29 3372501 523
2 2910372502 123
2 2910372503 523
2 29433725031123
2 2926372503 123
2 29 83725031123
2 2911372503 123
2 29 5372503 123
2 2933372503 123
2 29 8372501 123
2 2941372503 123
2 2954372503 923
2 29373725021123
2 2932372502 123
2 29 2372503 123
2 29293725021123
2 2915372503 523
2 2931372503 123
2 2948372502 123
2 29183725011123
2 29 4372503 123
2 2924372503 123
2 29 6372501 123
2 2924372503 123
2 29473725021123
2 29 4372501 523
2 29 43725011123
2 29 8372503 723
2 29103725031123
2 29433725021123
2 2915372501 123
2 29 6372503 123
2 2936372502 123
2 2914372503 123
2 29273725031123
2 2941372502 123
2 2942372502 223
2 29 3372503 123
2 2916372501 123
2 29 7372503 123
2 29 6372501 123
2 29 6372501 123
2 29133725031123
2 2939372501 123
2 2920372502 123
2 29 8372503 123
2 2954372502 123
2 2910372501 223
2 29 7372503 123
2 29 6372501 123
2 2924372502 123
2 29 9372501 123
2 2918372503 123
2 29 93725011123
2 2916372503 123
2 2929372503 123
2 29 2372501 523
2 2912372503 123
2 2921372502 123
2 2919372503 123
2 29 13725011123
2 29 8372503 223
2 29243725031123
2 2915372503 123
2 29363725021123
2 2924372503 123
2 2922372503 123
2 29 6372502 123
2 2911372501 123
3 29 7372501 523
3 2931372502 123
3 2916372503 123
3 2936372503 123
3 2912372503 223
3 29293725031123
3 2916372503 523
3 2929372502 123
3 29293725011123
3 2915372502 123
3 2921372502 123
3 2921372503 123
3 29 9372501 523
3 2936372503 123
3 2928372502 123
3 2957372502 123
3 29 1372503 123
3 2912372503 123
3 2914372503 523
3 2923372503 123
3 29 8372503 523
3 2924372503 123
3 2915372503 123
3 2916372502 123
3 2942372503 123
3 2918372502 123
3 2949372502 123
3 2911372501 523
3 2911372501 123
3 2919372502 123
3 2941372502 123
3 29343725031123
3 2917372501 123
3 29 5372503 123
3 2915372501 123
3 2914372503 523
3 29 4372503 123
3 2916372503 123
3 29 7372503 123
3 29 13725011123
3 29 8372502 123
3 29283725021123
3 2912372503 123
3 2920372502 123
3 2910372501 123
3 2918372501 523
3 2917372501 123
3 29 4372502 123
3 2924372503 123
3 2928372503 123
3 2922372502 123
3 29 53725011123
3 2947372502 123
3 2913372502 123
3 2930372502 123
3 2911372502 123
3 2928372502 123
3 2926372503 123
3 2921372503 123
3 2946372502 123
3 29 6372503 123
3 2918372503 123
3 2926372503 123
3 2920372502 223
3 2924372503 123
1 3014143802 111
1 3036143813 111
1 3016143813 111
1 3027143813 111
1 30 7143811 111
1 3030143813 111
1 30 8143801 111
1 3028143813 111
1 3026143813 511
1 30 9143803 111
1 3012143811 111
1 3014143813 111
1 3031143802 111
1 3027143802 111
1 3026143802 111
1 3029143812 111
1 3034143812 111
1 30 2143803 111
1 3037143812 111
1 3012143813 811
1 3012143803 111
1 3025143803 111
1 3023143802 111
1 3032143802 111
1 3024143812 111
1 3042143802 111
1 30 8143811 511
1 3028143803 111
1 30 8143801 111
1 3039143813 111
1 3032143813 111
1 3040143812 111
1 3020143803 111
1 3017143802 111
1 30 6143803 111
1 3041143802 111
1 3031143813 711
1 3036143812 111
1 3022143803 111
1 30 6143813 111
1 3037143812 111
1 3034143802 111
1 3031143812 111
1 3022143813 111
1 3028143812 111
1 3025143803 111
1 3021143813 111
1 3025143802 111
1 3025143813 111
1 3042143812 111
1 3015143811 111
1 3018143802 111
1 30 2143803 111
1 3039143812 111
1 3031143812 111
1 3046143812 111
1 3042143812 111
1 3021143813 111
1 3030143812 111
1 3023143813 111
1 3018143802 111
1 3048143812 911
1 3033143812 111
1 3014143803 111
1 3043143812 111
1 3028143812 111
1 30311438021111
1 3033143803 111
1 3021143803 111
1 3032143803 111
1 3014143813 111
1 3024143802 111
1 3023143803 111
1 3035143812 111
1 3026143812 111
1 3014143801 511
1 3036143802 111
1 3020143813 111
1 3032143812 111
1 3038143813 111
1 3024143802 111
1 30 8143813 111
1 3034143802 111
1 3026143813 111
1 3032143812 111
1 3034143802 111
1 3022143802 111
1 3032143813 111
1 30 9143813 111
1 3021143802 111
1 30 1143813 111
1 3024143803 111
2 3030193013 111
2 3026193012 111
2 3024193013 111
2 3016193003 111
2 3024193012 111
2 30 3193003 111
2 3031193013 111
2 3020193003 111
2 3023193013 111
2 3035193012 111
2 30 2193013 111
2 3024193003 111
2 3012193001 111
2 3031193011 111
2 30 1193013 111
2 3022193012 111
2 3031193002 111
2 3015193002 111
2 3037193002 111
2 3027193003 111
2 3023193003 111
2 3026193013 111
2 3032193012 111
2 3015193013 111
2 3025193002 111
2 30 5193013 111
2 30 6193003 111
2 3016193002 111
2 3023193002 111
2 3037193012 111
2 3033193003 111
2 30 4193001 111
2 3031193003 111
2 3019193012 111
2 3023193002 111
2 3025193002 111
2 3030193013 111
2 3025193002 111
2 3023193013 111
2 3022193002 111
2 3028193013 111
2 3027193002 111
2 3014193013 111
2 3015193003 111
2 30 1193002 111
2 3024193002 111
2 3022193003 111
2 3023193002 511
2 3011193003 111
2 3021193003 111
2 3011193003 111
2 3019193012 111
2 30 5193001 111
2 3027193013 911
2 3024193011 111
2 3030193003 111
2 3030193012 111
2 3021193002 511
2 3026193002 111
2 3021193003 111
2 30 4193003 111
2 3038193013 111
2 3015193011 111
2 3028193012 111
2 3034193013 111
2 3012193013 111
2 3014193001 111
2 3018193003 111
3 3036193103 111
3 3027193103 111
3 3015193103 111
3 30 8193101 111
3 3019193103 111
3 3019193103 111
3 3016193113 111
3 3021193103 111
3 3022193113 111
3 3020193102 111
3 3025193113 111
3 3026193102 111
3 3030193102 111
3 3026193103 111
3 3026193113 111
3 3027193103 511
3 3021193102 111
3 30 1193113 111
3 3028193103 111
3 3024193112 111
3 30 5193103 111
3 3022193103 111
3 3018193103 111
3 3023193103 111
3 3039193112 111
3 3034193112 111
3 3015193113 111
3 30 6193103 111
3 3020193101 111
3 3023193113 111
3 3029193113 111
3 3012193102 111
3 3014193113 111
3 3020193113 111
3 30 4193102 111
3 3022193103 111
3 3016193113 111
3 3024193102 111
3 3010193113 511
3 3027193103 711
3 3030193113 111
3 3015193103 111
3 3034193103 111
3 3022193112 111
3 3034193113 111
3 3026193102 111
3 3017193103 111
3 3010193103 111
3 3036193112 111
3 3029193113 111
3 3030193113 111
3 3023193103 111
3 3024193102 111
3 3018193103 111
3 3028193102 911
3 3029193111 611
3 3021193113 111
3 3026193103 111
3 3036193103 111
3 3027193103 711
3 3025193113 111
3 30 4193101 111
3 3022193102 111
3 3025193112 111
3 3031193113 111
3 3025193103 111
3 3020193112 111
3 3029193102 111
3 3025193113 111
3 3030193102 111
3 3032193102 711
3 3036193112 111
3 3022193111 111
3 3024193102 111
3 3026193103 111
3 3031193102 111
3 30 4193113 111
3 3017193103 111
3 3020193102 111
3 3027193102 111
3 3013193103 111
3 3039193113 111
3 3030193103 111
3 3024193112 111
3 3010193101 111
3 3015193102 111
3 3031193113 111
3 3029193112 111
3 3034193102 111
3 3019193102 111
3 30 5193111 111
1 3115531403 221
1 3114531403 121
1 3112531403 121
1 31 95314031121
1 31 3531403 121
1 3114531403 121
1 31245314031121
1 3137531403 121
1 3119531401 121
1 3123531402 121
1 31125314011021
1 31145314031021
1 3117531403 521
1 31 5531403 121
1 31 45314031121
1 3121531402 121
1 31 6531401 121
1 31 4531401 121
1 3118531403 621
1 3110531403 121
1 31 9531403 121
1 31 55314031121
1 3115531402 121
1 31 3531402 121
1 3120531401 421
1 31 9531403 721
1 3117531402 121
1 3127531401 421
1 3129531401 421
1 31 3531402 121
1 31 5531402 121
1 3117531402 121
2 3116771303 121
2 3111771301 121
2 3125771303 521
2 3112771301 421
2 3115771302 121
2 31 2771303 121
2 3121771302 121
2 31137713031121
2 3125771303 521
2 3110771301 121
2 3139771303 621
2 31 5771303 121
2 31 87713031021
2 3131771302 121
2 3133771301 421
2 3114771301 121
2 3116771303 121
2 3114771301 421
2 31 4771303 121
2 31 3771301 421
2 31 9771303 121
2 31 2771303 521
2 31 7771301 421
2 3115771303 921
2 31267713031021
2 3125771303 421
2 3131771303 121
2 31 8771301 421
2 31 5771302 121
2 3116771303 521
2 3124771301 421
2 3116771303 121
2 3111771303 121
3 3118771003 521
3 3137771003 421
3 3124771003 421
3 3124771003 121
3 31 4771003 721
3 31 6771001 121
3 3111771001 421
3 3120771003 721
3 3125771003 521
3 31 2771001 421
3 31 5771001 121
3 3120771003 421
3 31 2771001 421
3 31 5771001 521
3 31 4771003 621
3 31247710031021
3 3117771003 121
3 3138771002 121
3 3125771003 121
3 3121771002 121
3 31 8771001 121
3 3120771003 421
3 3110771001 121
3 31 8771003 421
3 31 3771002 121
3 31 6771001 421
3 31 6771003 121
1 3213381513 831
1 32 5381513 531
1 3234381512 131
1 32183815111031
1 3237381512 131
1 3218381513 531
1 3219381513 531
1 3212381513 531
1 32 4381513 731
1 32 93815111031
1 32 4381511 831
1 3233381512 631
1 3225381513 531
1 3219381513 231
1 3237381511 431
1 3235381513 831
1 3217381513 531
1 32103815131031
1 32 6381511 531
1 3225381511 531
1 3235381511 531
1 3216381511 531
1 3234381513 131
1 3214381511 731
1 3219381513 531
1 3217381511 831
1 3214381513 131
1 3223381512 531
1 3215381513 131
1 3231381513 131
1 32 23815111131
1 3210381513 731
1 3212381511 831
1 3231381513 831
1 3217381513 531
1 3222381513 531
1 3218381512 131
1 3242381513 531
1 32 8381511 531
1 3236381512 531
1 3223381513 631
1 3240381513 231
1 32323815131031
1 32 8381511 831
1 3235381512 531
1 3246381513 131
1 3213381513 131
1 3252381512 131
1 3234381513 531
1 3221381513 531
1 3232381512 131
1 3217381513 731
1 32 1381511 131
1 3231381513 131
1 32 8381513 531
1 3213381513 131
1 3224381511 531
2 3220651513 131
2 3216651512 531
2 3246651512 831
2 32 2651511 731
2 3212651511 531
2 3229651513 731
2 32146515111031
2 3240651511 831
2 3238651512 131
2 32 7651511 531
2 3213651511 831
2 3216651513 531
2 3225651513 531
2 32 16515111031
2 3254651512 131
2 3213651513 531
2 32186515131131
2 32166515111031
2 32476515121031
2 3223651513 531
2 3238651512 131
2 32 5651511 131
2 3214651511 531
2 3217651512 131
2 3234651512 131
2 3227651513 531
2 3222651511 531
2 3229651513 531
2 3217651511 231
2 3230651512 531
2 32 6651511 131
2 3233651513 531
2 3222651513 631
2 3230651511 131
2 3211651513 131
2 3221651513 131
2 3216651513 531
2 32216515111031
2 3210651513 131
2 3216651513 531
2 32 9651513 531
2 3217651513 231
2 3210651513 131
2 3224651511 531
2 3236651513 131
2 3213651513 231
2 3234651513 531
2 3214651513 131
2 3245651512 131
2 3215651513 531
2 3233651511 531
2 3211651513 531
2 3213651511 531
2 32466515131031
2 3224651512 531
2 3210651511 831
2 3230651513 531
2 3218651511 531
2 3219651511 731
2 3216651511 431
2 32 9651511 531
2 3223651513 131
2 32326515131031
2 3211651513 531
2 3222651511 131
3 32 9651413 531
3 3240651413 531
3 3237651412 531
3 32626514121031
3 3223651413 731
3 32 8651413 131
3 3210651413 531
3 32376514131031
3 32 8651411 531
3 32 3651413 131
3 3221651413 531
3 3222651412 131
3 3213651411 731
3 3237651413 531
3 32 9651412 531
3 32 2651411 431
3 32 5651413 531
3 32116514111031
3 32 1651413 531
3 3212651411 531
3 32 8651411 531
3 3211651413 131
3 3221651413 231
3 32 8651413 531
3 32206514131031
3 32 7651411 131
3 3233651413 731
3 3216651413 531
3 3219651413 131
3 3214651412 131
3 3227651413 531
3 32 76514121131
3 3220651412 531
3 32156514131031
3 3216651411 131
3 3221651413 631
3 3217651411 131
3 32 3651412 131
3 3226651413 131
3 3216651413 531
3 3214651411 131
3 32 3651411 131
3 32246514131031
3 3239651413 231
3 32376514131031
3 3226651413 131
3 32136514111031
3 3217651412 131
3 32 4651411 131
3 3218651413 131
3 3225651413 731
3 3217651411 831
3 32236514131131
3 3223651413 531
3 32 2651411 531
3 32 9651411 531
3 3228651413 531
3 3238651413 731
3 32216514131131
3 32376514121131
3 3236651413 531
3 3241651413 731
3 3231651413 531
3 32 5651411 531
3 3240651412 131
3 32 7651411 531
3 3216651413 531
1 3333222213 112
1 3326222203 112
1 3313222203 612
1 3325222213 112
1 3322222212 112
1 3323222212 512
1 3315222213 112
1 3317222213 512
1 3352222202 112
1 3316222213 612
1 33 1222203 112
1 3316222213 112
1 3324222213 512
1 33 9222203 112
1 3334222202 112
1 3315222213 112
1 33 2222211 112
1 33 1222211 112
1 3332222202 112
1 3334222212 112
1 33 9222211 512
1 3341222212 112
1 3332222201 412
1 3317222201 112
1 3331222212 512
1 33282222031112
1 3317222203 112
1 3313222211 112
1 3329222213 512
1 3319222213 512
1 3335222202 112
1 3349222212 112
1 3354222212 112
1 3318222213 512
1 3327222213 112
1 3320222213 112
1 3319222212 112
1 3312222201 112
1 3330222213 112
1 3314222203 112
1 3331222203 112
1 3316222213 112
1 3341222212 112
1 3322222213 512
1 3314222203 112
1 3321222203 112
1 3342222202 112
1 3312222213 112
1 3338222213 112
1 3331222213 112
1 33 7222203 812
1 3336222212 112
2 3341572313 112
2 3319572301 512
2 3336572303 112
2 33 3572311 112
2 3331572313 112
2 33 4572303 512
2 3329572313 112
2 3327572312 512
2 3311572303 112
2 3331572312 112
2 3312572311 512
2 33 8572303 112
2 3312572303 112
2 33 4572311 112
2 3316572302 112
2 33 15723031112
2 33 6572301 112
2 3344572313 112
2 3318572302 412
2 3334572303 912
2 33 5572301 112
2 33 7572301 512
2 3336572313 112
2 3315572313 112
2 33 4572313 512
2 33 15723011012
2 33 3572303 112
2 3336572313 112
2 33 2572301 112
2 33 2572303 112
2 3335572313 112
2 3334572303 112
2 3337572313 112
2 3320572311 112
2 3314572311 412
2 33 3572301 112
2 3345572312 112
2 33 1572303 512
2 3323572313 112
2 3319572301 512
2 3317572302 112
2 3325572312 112
2 3326572312 812
2 3320572302 112
2 3322572303 512
2 3330572303 112
2 3328572312 512
2 33275723031012
2 3331572303 512
2 33 4572301 112
2 3336572302 112
2 33 9572301 112
2 33 3572302 112
2 3311572301 812
2 33 95723031112
2 3342572312 112
2 3325572303 112
2 3318572303 112
2 3319572302 112
2 33 8572301 812
2 3312572303 412
2 3318572313 512
2 3340572303 412
2 3356572312 512
2 3340572312 112
2 33 2572313 512
2 33115723111012
3 3311571613 112
3 3318571603 112
3 3345571602 112
3 3330571613 512
3 33 7571601 112
3 3317571603 112
3 3312571603 512
3 3339571602 512
3 3315571601 112
3 3340571602 112
3 3322571613 112
3 3312571603 512
3 3323571603 112
3 3317571601 412
3 3334571613 112
3 33 8571603 112
3 3323571613 112
3 3312571601 112
3 3349571612 112
3 3339571612 512
3 3314571613 112
3 3330571613 512
3 33 8571603 612
3 3322571602 112
3 3315571603 112
3 3328571603 112
3 3334571612 112
3 3332571613 112
3 33 2571611 112
3 33 4571601 112
3 33 1571601 112
3 3311571601 112
3 3323571613 112
3 3314571611 112
3 3312571611 112
3 3329571602 112
3 3316571601 112
3 33235716111012
3 33 7571601 112
3 3310571602 112
3 3327571602 112
3 33 4571601 112
3 33 9571601 112
3 3317571601 412
3 33 1571601 112
3 3311571603 112
3 3323571603 112
3 3318571611 112
3 33 6571613 112
3 3318571612 112
3 3320571603 112
3 3334571612 112
3 3317571613 112
3 3316571603 412
3 3327571613 112
3 3326571613 112
3 3310571603 112
3 3330571603 112
3 33 5571601 512
3 3315571601 112
3 3316571613 112
1 34 3192413 111
1 3417192413 511
1 3423192402 511
1 3453192412 111
1 3418192411 711
1 3423192403 111
1 3426192412 111
1 3431192412 511
1 3414192402 111
1 3426192413 211
1 3426192413 111
1 34 31924131111
1 34211924131111
1 3422192403 111
1 3424192412 111
1 3415192403 111
1 3430192413 711
1 3413192401 111
1 3426192413 511
1 3435192402 711
1 3430192403 111
1 3420192402 111
1 3428192412 111
1 3446192412 811
1 3422192413 111
1 3419192411 111
1 3422192402 811
1 3419192411 911
1 3427192403 111
1 3414192413 111
1 3424192403 711
1 3424192413 711
1 3418192403 711
1 3433192402 111
1 3419192413 111
1 3414192403 511
1 3427192413 511
1 3421192403 511
1 3411192411 111
1 3446192413 711
1 3422192403 111
1 3433192402 511
1 3411192411 511
1 3418192401 111
1 3452192413 111
1 3440192402 111
1 3431192401 711
1 3431192413 211
1 3425192413 511
1 3428192411 111
1 3423192401 711
1 3419192401 811
1 3417192413 111
1 34 9192403 111
1 34 6192401 511
1 3424192401 711
1 3435192412 111
1 3414192413 511
1 3430192412 111
1 34 7192411 111
1 3413192403 111
1 3418192413 511
1 3442192413 711
1 3415192403 511
1 3422192403 811
1 3434192413 111
1 34 9192413 111
1 34 2192401 111
1 3412192413 811
1 3416192413 111
1 3424192413 811
1 3434192412 111
1 3427192412 811
1 34 4192413 511
1 3413192411 111
1 3431192412 111
1 3410192401 811
1 3417192413 511
1 3422192413 111
1 3438192413 111
1 3418192402 111
1 3418192401 511
1 3418192413 711
1 3421192412 111
1 3434192402 411
1 3427192411 111
1 3427192413 111
1 3412192411 811
1 3440192412 111
1 3429192401 111
1 3426192411 611
1 3410192401 111
1 3442192413 111
1 3414192402 811
1 3417192403 111
1 3416192413 111
1 3419192403 111
1 3446192402 111
1 3412192402 111
1 3423192403 111
1 3435192402 111
1 3425192411 511
1 3430192401 811
1 3516361903 111
1 3511361901 111
1 3520361903 111
1 3527361902 111
1 3531361902 211
1 3514361913 111
1 3520361912 111
1 35 33619011011
1 35 5361901 511
1 35 8361901 511
1 3526361912 111
1 3532361913 711
1 3520361902 111
1 3510361911 511
1 3517361903 111
1 35 3361901 111
1 3517361913 111
1 35 5361903 111
1 3533361902 111
1 3510361913 111
1 3536361913 111
1 35 6361903 511
1 3515361903 511
1 3537361912 111
1 3510361903 111
1 3520361912 511
1 3514361903 111
1 3513361911 211
1 3530361902 111
1 35 2361903 111
1 3524361902 711
1 3518361901 511
1 3520361903 111
1 3511361903 111
1 35 9361903 711
1 3521361913 511
1 3521361913 111
1 35 6361901 111
1 3525361913 111
1 3515361903 911
1 3511361903 111
1 35 4361901 111
1 3514361903 111
1 35 8361903 511
1 3533361902 111
1 35153619021111
1 35 4361902 111
1 35473619031111
1 3521361903 111
1 3547361912 111
1 3511361913 511
1 3522361903 111
1 3535361912 111
1 3512361903 111
2 3518391613 811
2 3531391613 111
2 3512391603 511
2 3515391613 111
2 3524391613 111
2 3515391613 111
2 3513391613 111
2 35 9391601 111
2 35 1391611 111
2 3512391602 711
2 35 5391603 111
2 35 3391613 111
2 35 9391613 111
2 3532391613 111
2 35 8391601 511
2 35 13916011111
2 35 6391613 111
2 35 83916011011
2 35 6391603 111
2 35 3391611 111
2 35 9391603 311
2 3515391603 111
2 35 2391611 811
2 35403916121011
2 3516391603 111
2 3511391613 111
2 3545391602 111
2 35 3391602 111
2 3541391602 711
2 3512391603 511
2 35 1391611 111
2 3521391613 111
2 3517391603 511
2 35 1391601 511
2 3524391602 111
2 3516391613 111
2 3520391612 711
2 35 1391601 111
2 3530391603 111
2 35 6391611 511
2 3535391613 111
2 3513391603 111
2 35 9391601 511
2 3514391603 811
2 3511391601 111
2 3517391603 111
2 3514391603 111
2 3513391613 111
2 35 3391611 511
2 35 7391611 111
2 35 9391601 511
2 3520391612 111
2 3514391613 111
2 3548391602 111
2 3518391603 111
3 3522392101 611
3 3540392102 111
3 3517392103 811
3 3538392102 111
3 3553392113 511
3 3510392103 511
3 35 7392101 111
3 3515392112 111
3 3527392103 511
3 35293921021111
3 3526392113 111
3 35 8392111 111
3 35343921011011
3 3522392113 111
3 3533392102 111
3 3511392103 511
3 3510392113 111
3 35 9392101 511
3 3530392103 111
3 3518392101 111
3 35 9392103 111
3 35 3392111 811
3 35 2392101 511
3 35453921011011
3 3540392113 111
3 3542392102 111
3 35 8392103 111
3 35 1392103 111
3 35193921131011
3 3514392103 911
3 3516392113 111
3 35 5392103 111
3 3519392103 111
3 3531392113 111
3 3523392102 111
3 3512392113 111
3 3518392113 111
3 35153921031011
3 3525392113 511
3 3526392103 111
3 3531392113 111
3 35383921031011
3 3511392113 111
3 35 6392101 111
3 3515392111 511
3 35 4392101 511
3 35 4392102 211
3 3547392102 111
3 3554392102 111
3 3548392102 111
3 3514392103 111
3 35 8392101 111
3 3547392112 111
3 3524392113 111
3 3528392112 111
3 35 9392101 111
3 3611292503 111
3 3617292513 111
3 3610292503 111
3 3629292502 111
3 36 7292513 111
3 3612292513 111
3 3621292502 111
3 3610292503 111
3 3621292502 111
3 36 4292511 111
3 3624292502 111
3 3638292502 111
3 3632292503 111
3 36 3292503 111
3 36 2292501 111
3 3615292513 111
3 36 9292503 111
3 3615292513 111
3 3631292503 111
3 3617292503 111
3 3626292512 111
3 36 5292503 111
3 3624292503 511
3 3618292512 111
3 3610292503 111
3 3619292513 111
3 36 3292501 111
3 36 9292511 111
3 3631292502 111
3 3624292513 111
3 36 4292512 111
3 3628292513 111
3 3612292513 111
3 3616292501 111
3 3631292512 111
3 3622292513 111
3 3616292502 111
3 36 3292501 111
3 3632292503 111
3 3640292513 511
3 3638292502 511
3 3632292502 111
3 3611292513 111
3 36 7292502 111
3 3629292502 111
3 3619292512 111
3 36 1292503 111
3 3622292503 111
3 3623292503 111
3 3623292513 111
3 3625292512 111
3 36222925131111
3 3613292503 111
3 36 5292503 111
3 3623292512 111
3 3637292512 111
3 3613292513 111
3 36 4292511 111
3 36 8292503 111
3 36 8292513 111
3 3620292503 111
3 3637292513 511
3 3617292513 111
3 3623292503 111
3 3616292502 111
3 3630292513 111
3 36 6292501 511
3 3611292503 111
3 3611292503 111
3 36 1292511 111
3 36 4292501 111
3 3620292512 111
3 3620292503 111
3 3612292503 111
3 3635292512 111
3 3612292513 111
3 3614292513 511
3 3615292513 111
3 3614292501 111
3 36 4292502 111
3 3633292513 111
3 36 9292503 111
3 3629292513 111
3 3644292503 111
3 36 2292503 111
3 3623292502 111
3 3631292513 111
3 3623292512 111
3 36192925031011
3 3614292513 111
3 3634292512 111
3 3640292503 111
3 36 6292503 111
3 3611292511 111
3 3615292513 111
3 3628292502 111
3 36 3292501 111
3 36 3292501 111
3 3630292502 111
3 3630292503 111
3 3617292511 111
3 36 5292512 111
3 3633292512 111
3 3644292502 111
3 36 1292503 111
3 36 4292513 111
3 3612292503 111
3 36 7292503 111
3 36 4292501 111
3 3611292502 111
3 36 3292503 111
3 3613292513 111
3 3630292513 111
3 3622292503 111
3 36 7292503 111
3 3625292513 111
3 36 1292511 111
3 36 5292511 111
3 36 9292503 111
2 3713273211 131
2 37 9273211 131
2 3768273213 131
2 3717273213 131
2 3751273212 131
2 3710273212 131
2 3736273212 131
2 3718273213 131
2 3747273212 131
2 3758273213 131
2 3711273213 131
2 3731273213 131
2 3749273212 131
2 3718273212 131
2 3738273213 131
2 3737273212 131
2 3711273211 131
2 3719273213 131
2 3719273213 131
2 3718273213 131
2 3731273212 131
2 3717273212 131
2 3714273213 131
2 3721273213 131
2 37 6273213 131
2 3726273213 131
2 3721273213 131
2 3723273213 131
2 3714273213 131
2 3726273213 131
2 3731273212 131
2 3713273213 131
2 3723273213 131
2 3718273213 131
2 3745273212 131
2 3728273213 731
2 3721273213 131
2 3724273213 131
2 3760273213 131
2 3723273213 131
2 3720273213 131
2 3722273213 131
2 3714273213 131
2 3724273213 131
2 3740273212 131
2 37192732131131
2 37 9273211 131
2 3731273213 131
2 37 5273211 131
2 3715273213 131
2 3739273213 131
2 3715273213 131
2 3730273213 131
2 3717273211 531
2 3719273212 131
2 3739273213 131
2 37 7273213 131
2 3724273211 131
2 3713273211 131
2 3711273213 131
2 3726273213 131
2 3726273213 131
2 3727273213 131
2 3718273213 131
2 3719273213 131
2 3715273213 131
2 3713273213 131
2 3716273213 231
2 3715273213 131
2 3721273213 131
2 3746273213 131
2 3713273212 131
2 37 22732131031
2 3719273213 131
2 3720273213 131
2 37 9273211 131
3 3716272611 131
3 37 5272613 131
3 37 7272613 131
3 3727272612 131
3 3720272613 131
3 3711272613 131
3 3720272613 131
3 3734272613 131
3 3730272613 131
3 3712272613 131
3 3733272613 131
3 37 9272613 131
3 3732272612 131
3 3720272611 131
3 3718272613 831
3 37 6272613 131
3 3711272611 131
3 3718272613 131
3 3719272613 131
3 3725272613 131
3 3732272612 131
3 3724272612 131
3 3722272612 131
3 3714272613 131
3 3720272613 131
3 3717272613 131
3 3732272612 131
3 3717272613 131
3 3726272613 131
3 3717272613 131
3 3717272612 131
3 3724272613 131
3 3714272612 131
3 37 9272611 131
3 3737272612 131
3 37 32726131131
3 37 4272613 131
3 37 4272613 131
3 3733272613 131
3 3725272613 131
3 3728272613 131
3 3723272612 131
3 3717272612 831
3 3718272612 131
3 3726272613 131
3 37422726131031
3 3724272613 131
3 3719272613 131
3 3716272613 131
3 3718272613 131
3 37 2272611 131
3 3736272613 131
3 3738272613 131
3 3716272613 131
3 3750272612 131
3 3731272613 131
3 37 2272611 731
3 3711272613 131
3 3741272612 731
3 3734272612 131
3 37 9272613 131
3 3740272612 131
3 3742272612 131
3 37 7272613 131
3 3723272613 131
3 3719272613 131
3 3722272613 731
3 3718272613 131
3 3723272613 131
1 3825272413 831
1 38372724131031
1 3832272413 731
1 3815272411 531
1 38462724121131
1 38 6272413 531
1 3819272412 731
1 3824272412 231
1 3830272412 131
1 3830272412 531
1 3819272413 131
1 3813272413 131
1 38 9272411 131
1 3816272413 531
1 3817272413 531
1 3839272413 431
1 3816272413 531
1 3817272413 831
1 3825272412 531
1 3841272412 731
1 3815272411 731
1 3819272413 531
1 38 9272413 531
1 3818272413 231
1 38 8272411 531
1 38 3272411 531
1 38 6272413 131
1 3810272413 531
1 3811272413 531
1 3821272413 831
1 3816272413 531
1 3817272413 831
1 38 2272411 131
1 3822272413 731
1 3825272413 531
1 3829272412 931
1 3818272413 131
1 3826272412 131
1 3815272411 531
1 3821272413 831
1 3810272411 531
1 3822272413 531
1 3824272413 731
1 3837272412 131
1 3830272413 731
1 3831272412 131
1 3818272413 131
1 3828272412 131
1 3817272413 831
1 3830272412 531
1 38 8272413 131
1 38 9272411 531
1 3819272412 531
1 3819272413 131
1 38 5272411 531
1 3829272412 531
1 38 9272413 131
1 3826272413 131
1 3825272413 131
1 3840272413 831
1 3826272413 731
1 3818272411 631
1 3832272412 131
1 38142724131031
1 3813272413 131
1 3821272412 131
1 38 8272413 131
1 3827272413 831
1 3824272413 531
1 3820272412 131
1 3828272413 131
1 3827272412 131
1 38 7272411 831
1 3920313003 121
1 39343130021121
1 3911313001 121
1 3918313003 521
1 3922313003 121
1 39263130031021
1 39 5313003 521
1 39 8313003 121
1 3911313003 121
1 3926313002 121
1 3945313002 121
1 3938313002 121
1 3917313003 121
1 3917313003 521
1 39 7313001 121
1 3913313001 121
1 3930313002 121
1 3915313003 121
1 3921313002 121
1 3916313003 121
1 39 7313003 521
1 3922313002 121
1 39 1313001 121
1 3918313003 521
1 3947313002 121
1 3935313002 121
1 3940313002 121
1 39 3313001 121
1 3928313003 121
1 39253130021121
1 3910313003 121
1 39 4313001 121
1 3911313003 121
1 39 33130031021
1 3911313003 121
1 3931313003 521
1 39 1313001 521
1 3920313003 121
1 39 8313003 521
1 3921313003 121
1 39 7313001 521
1 3919313003 121
1 3944313002 121
1 3922313002 121
1 3944313002 121
1 3951313002 121
1 3911313003 121
1 3923313003 121
1 3918313002 121
1 3914313003 121
1 3924313003 121
1 39 7313001 521
1 39 4313003 121
1 3917313003 121
1 3919313003 121
1 3932313002 121
1 39 1313001 121
1 3914313001 121
1 3913313003 121
1 3920313002 121
1 3929313003 821
1 3918313003 121
1 39 6313001 521
1 39 1313001 121
1 39343130021121
1 3911313003 121
1 39 8313003 121
1 39 3313001 121
1 3917313003 121
1 3913313001 121
1 3924313003 121
1 3949313002 121
1 39 6313001 121
1 3932313002 121
1 3935313002 121
1 39 2313001 121
1 39 6313003 121
1 3915313002 121
1 39123130011121
1 39 7313003 121
1 3925313002 121
1 3953313002 121
1 3927313002 121
1 3939313003 121
1 3936313002 121
1 3916313001 121
1 3920313003 121
1 3918313003 121
1 39303130021021
1 3918313002 121
1 3940313003 121
2 3917392502 121
2 3914392503 121
2 39173925011021
2 3929392502 121
2 3933392503 121
2 39 6392503 121
2 3922392503 121
2 39 8392503 521
2 3922392502 121
2 3937392503 121
2 3939392503 121
2 3932392502 121
2 3911392501 221
2 3922392502 121
2 3942392502 121
2 39 8392503 121
2 3922392502 121
2 3917392503 121
2 3918392503 121
2 39 4392501 121
2 3913392503 121
2 3922392501 121
2 3930392501 121
2 3923392503 121
2 3911392502 121
2 3920392502 121
2 3924392502 121
2 3917392503 121
2 3913392503 121
2 3922392503 121
2 39433925031121
2 3919392503 121
2 3918392502 121
2 3928392502 121
2 3915392501 121
2 3935392502 121
2 39 2392501 121
2 3917392501 121
2 3921392503 521
2 39 6392503 121
2 3912392503 121
2 3912392502 121
2 3918392502 221
2 3910392501 121
2 3926392503 121
2 3919392503 121
2 3919392502 121
2 3916392503 121
2 3917392502 121
2 3917392502 121
2 3923392501 121
2 3919392503 121
2 39 6392501 521
2 3916392502 121
2 39 5392503 121
2 3920392503 521
2 3935392502 121
2 3915392503 121
2 3930392502 121
2 3917392503 121
2 3910392501 521
2 3921392503 121
2 39 4392501 521
2 3917392503 821
2 39 1392501 721
2 3921392503 121
2 39 9392502 121
2 3921392503 121
2 39 9392501 121
2 3911392502 121
2 39 8392503 521
2 3916392503 521
2 3911392503 121
3 39 8392503 121
3 3927392503 121
3 3959392502 121
3 3918392501 421
3 3919392503 821
3 3938392502 121
3 3928392503 121
3 3921392503 121
3 3924392503 121
3 3926392503 121
3 3910392501 121
3 3928392503 521
3 39 9392501 221
3 39 3392503 121
3 3924392503 121
3 3919392503 121
3 3916392503 121
3 39 9392502 121
3 3915392503 121
3 39 5392502 121
3 39353925011021
3 3917392503 121
3 3943392502 121
3 3942392502 121
3 3928392503 121
3 3910392501 521
3 3943392502 121
3 3920392503 521
3 3914392501 521
3 3919392502 521
3 3911392503 121
3 39 6392501 521
3 3920392501 121
3 3921392502 121
3 39 9392501 121
3 3939392502 121
3 3919392503 121
3 3926392503 521
3 3926392502 521
3 3920392503 121
3 3956392502 121
3 3931392502 121
3 3912392503 121
3 3937392502 121
3 3919392503 121
3 3924392503 121
3 3915392503 121
3 3933392503 121
3 3918392503 121
3 3950392502 121
3 3934392502 121
3 3938392502 121
3 39123925031121
3 3923392502 721
3 3924392502 121
3 3930392502 121
3 39 9392503 521
3 3938392503 121
3 3918392503 221
3 3922392503 121
3 3955392502 121
3 3948392502 521
3 3936392503 821
3 39 6392503 121
3 3921392503 521
3 3931392502 121
3 3934392503 121
3 3919392503 121
3 3911392503 121
3 3922392503 521
1 40236417111011
1 4021641703 111
1 40176417111111
1 4024641712 111
1 4030641713 111
1 4017641712 111
1 4011641711 111
1 4011641702 111
1 4017641702 111
1 4029641712 111
1 40356417121111
1 4043641713 111
1 4013641713 111
1 4020641702 111
1 40 1641703 111
1 4022641713 111
1 40 3641703 111
1 4017641703 511
1 4015641713 111
1 4010641713 111
1 4011641703 111
1 4024641713 111
1 40 3641703 111
1 40 96417111111
1 40 8641711 111
1 40 8641701 111
1 4032641703 111
1 40 3641703 111
1 4035641701 111
1 4024641713 111
1 40 2641713 111
1 4014641702 111
1 4010641713 111
1 4016641711 511
1 4012641713 111
1 4035641703 111
1 4022641703 111
1 40 4641701 511
1 4026641713 111
2 4012721702 111
2 4029721713 111
2 4011721713 111
2 4016721713 111
2 40 17217131111
2 4018721703 111
2 4022721703 111
2 4026721702 111
2 4052721712 111
2 4039721713 111
2 4023721703 111
2 40 9721703 511
2 4011721712 111
2 4019721713 111
2 4013721703 111
2 4038721703 111
2 4010721702 111
2 40 6721703 111
2 4011721703 111
2 4018721703 111
2 4014721712 111
2 4022721701 911
2 40107217031011
2 4017721703 111
2 4018721713 111
2 4037721703 111
2 4030721701 911
2 40 6721711 111
2 4015721703 111
2 40187217131111
2 4022721713 111
2 4015721713 111
2 40 5721703 111
2 4015721703 111
2 4037721702 111
3 4011721403 511
3 40 4721401 111
3 4011721413 111
3 4019721403 111
3 4019721413 111
3 4025721402 111
3 40147214011011
3 40 4721411 111
3 4010721413 111
3 4028721413 111
3 4031721413 711
3 4029721412 111
3 40 6721413 111
3 4029721411 111
3 4025721403 511
3 4025721403 111
3 4023721403 111
3 4018721403 111
3 4016721403 911
3 40 6721413 111
3 40 3721403 111
3 40 4721411 111
3 4016721403 111
3 40 9721403 111
3 4030721413 111
3 4031721402 111
3 40 4721411 111
3 4038721412 111
3 40 9721401 111
3 4015721413 111
3 4010721413 111
1 4118192912 132
1 4112192913 132
1 4125192912 132
1 4133192912 132
1 4135192912 332
1 4134192913 132
1 4130192913 132
1 4110192911 132
1 4110192911 132
1 4140192912 132
1 4114192911 132
1 4122192913 132
1 4115192913 132
1 4114192913 132
1 4118192913 532
1 4114192913 132
1 41 9192913 132
1 4132192913 132
1 4134192912 132
1 4134192912 132
1 4115192911 132
1 4116192912 932
1 4142192912 532
1 4141192912 132
1 4130192913 132
1 4113192913 132
1 41341929131132
1 4123192913 132
1 4148192912 132
1 4133192912 132
1 4118192912 132
1 4132192913 132
1 4112192913 132
1 4120192912 132
1 41451929121132
1 41 4192911 532
1 4128192912 132
1 4138192913 132
1 4131192912 132
1 4130192913 132
1 4115192913 132
1 4112192913 132
1 4125192912 132
1 4117192913 132
1 4139192912 132
1 4116192913 532
1 4125192911 732
2 4118232413 932
2 4122232412 132
2 4133232412 132
2 41562324131132
2 4129232413 132
2 4131232413 132
2 4129232413 132
2 4135232413 932
2 4122232413 132
2 4138232412 132
2 4137232412 132
2 4141232412 132
2 4128232413 132
2 4147232413 132
2 4124232413 132
2 4146232412 132
2 41 5232411 132
2 4122232413 132
2 4116232411 532
2 4125232413 132
2 4112232411 132
2 4127232412 132
2 4113232413 132
2 4135232412 532
2 4148232412 132
2 4152232412 132
2 4118232413 132
2 4138232412 732
2 4124232413 532
2 4112232413 132
2 4112232413 132
2 4110232413 132
2 4119232411 132
2 4136232412 132
2 4119232413 532
2 4119232413 132
2 4114232413 132
2 4126232412 532
2 4133232412 132
2 4118232413 532
2 4124232413 132
2 41 9232413 532
2 4141232412 132
3 4129232813 132
3 4137232813 132
3 41 3232813 132
3 41 2232811 132
3 4134232812 132
3 4119232812 132
3 4126232813 132
3 4117232813 932
3 4129232813 532
3 41352328111132
3 4134232812 132
3 4144232813 132
3 4136232812 132
3 4139232813 532
3 41262328131132
3 4131232812 132
3 4146232812 132
3 4125232813 132
3 4122232811 532
3 4119232813 132
3 4145232812 132
3 4144232813 132
3 4136232812 132
3 4139232813 132
3 41 2232811 132
3 4124232811 532
3 41 7232811 532
3 4121232813 132
3 4147232812 132
3 4117232813 132
3 4138232812 132
3 4122232811 132
3 4119232813 132
3 4141232812 232
3 4128232812 132
3 4117232813 132
3 4137232813 132
3 4125232813 132
3 4118232813 132
3 4135232812 532
3 4117232813 132
3 4125232812 132
3 4117232813 132
3 4118232813 132
3 4120232813 132
3 4119232811 132
3 4127232812 132
3 4132232812 132
3 41 8232813 132
3 4126232813 532
1 4232253202 121
1 4255253202 821
1 4249253202 821
1 42 5253201 721
1 4229253203 721
1 4210253201 121
1 4245253202 121
1 4236253203 121
1 4242253202 121
1 4249253202 121
1 4222253203 221
1 4219253203 121
1 4226253202 121
1 4229253203 121
1 4223253203 721
1 42 6253201 521
1 4255253202 121
1 4221253202 121
1 4213253203 121
1 4234253203 521
1 4226253203 121
1 4220253203 121
1 4224253203 721
1 42 9253201 521
1 4212253201 521
1 4230253202 121
1 4219253201 121
1 4246253202 821
1 4232253203 121
1 4249253202 121
1 4259253202 121
1 4232253203 121
1 42112532031021
2 42 8382503 121
2 4258382502 721
2 4254382502 121
2 4238382503 121
2 4244382503 121
2 42 8382501 121
2 4246382502 121
2 4257382502 121
2 4254382502 821
2 4227382503 121
2 4242382502 121
2 4231382503 521
2 4227382502 521
2 4231382503 121
2 4269382502 121
2 4261382502 121
2 4210382503 121
2 4249382502 721
2 4236382502 221
2 42293825031021
2 4241382502 121
2 4220382503 121
2 42 7382501 521
2 4244382502 821
2 4242382503 121
2 4215382501 521
2 4218382501 521
2 42 9382503 121
2 42 4382503 121
2 4234382502 521
3 4237383202 121
3 4231383203 121
3 4227383203 121
3 4253383202 121
3 4232383201 121
3 4229383202 621
3 4215383202 121
3 4255383202 121
3 4255383202 121
3 4229383203 121
3 4244383202 121
3 4257383202 121
3 4245383203 821
3 4210383201 821
3 4229383203 121
3 4215383203 121
3 4231383202 121
3 4219383201 521
3 4225383203 121
3 4236383203 121
3 4234383202 121
3 4225383203 521
3 4236383202 121
3 4230383203 121
3 42 53832011121
3 4236383203 121
3 42383832031021
3 4235383203 121
3 4229383203 121
3 4227383203 821
3 4231383203 121
3 4230383203 821
3 4220383203 121
3 4236383203 121
3 4224383203 121
3 4257383202 121
3 4234383202 121
1 4364172412 131
1 4351172412 231
1 4331172413 131
1 4311172413 131
1 4314172411 231
1 4317172411 131
1 4346172413 131
1 4334172413 131
1 4351172413 131
1 4355172412 131
1 4335172413 931
1 4334172413 131
1 4319172413 131
1 4330172413 131
1 4313172411 131
1 4334172413 131
1 4318172413 131
1 4343172413 131
1 4350172412 131
1 4324172413 131
1 43181724131031
1 4321172411 531
1 4353172412 131
1 43 6172411 531
1 4340172413 131
1 4311172411 131
1 4310172411 131
1 4319172413 131
1 4345172413 131
1 4316172413 131
1 4353172413 131
1 4354172413 131
1 4351172412 131
1 4338172413 131
1 4331172413 131
1 4344172412 131
1 4323172413 131
1 43661724131131
1 4341172413 131
1 4316172413 131
1 4345172412 131
1 4335172412 131
1 4330172411 531
2 43 3192511 131
2 4327192513 131
2 4324192513 131
2 4342192513 531
2 43 8192511 531
2 4331192513 131
2 4310192513 531
2 4326192512 131
2 4337192513 131
2 4324192513 131
2 4329192512 131
2 4320192513 131
2 4331192513 131
2 4339192513 131
2 4334192513 131
2 4331192513 831
2 4311192513 131
2 4317192511 531
2 4332192513 131
2 4329192512 131
2 4323192513 131
2 4339192513 931
2 4336192513 131
2 4327192513 131
2 4343192513 231
2 4344192513 131
2 4315192511 731
2 4341192513 531
2 4340192512 131
2 4320192513 131
2 4319192513 531
2 43 5192513 131
2 4328192512 531
2 4326192513 131
2 4324192513 131
2 4330192513 531
2 4344192512 131
2 4336192512 131
2 4323192511 531
2 4337192512 131
2 4320192513 131
2 4315192513 131
2 43241925111131
2 43 4192511 531
2 43241925131131
2 4355192512 131
2 4346192512 131
2 4353192512 131
3 4317192611 531
3 43 1192613 631
3 4316192612 131
3 43 41926111031
3 4338192613 131
3 4317192613 131
3 4318192613 531
3 4331192613 131
3 4335192613 131
3 4314192611 831
3 43361926121131
3 4332192613 131
3 4327192612 131
3 4352192612 131
3 4353192612 131
3 4353192612 131
3 43531926121131
3 4336192612 131
3 4327192613 131
3 4345192613 231
3 4329192613 531
3 4328192613 131
3 4342192612 131
3 4322192613 131
3 4327192611 131
3 4329192613 131
3 4315192611 531
3 4316192613 531
3 4339192613 131
3 4329192613 531
3 4354192612 131
3 4344192612 131
3 4334192613 331
3 4312192613 531
3 4320192613 131
3 4346192613 931
3 4312192613 131
3 4328192613 131
1 4421421401 521
1 4443421402 521
1 44 1421401 521
1 4440421402 121
1 4417421401 521
1 44 9421403 521
1 4421421403 121
1 4431421403 121
1 4418421403 121
1 44 7421401 521
1 44 44214011121
1 4412421401 521
1 44 6421401 521
1 44 34214031021
1 44 2421401 521
1 4415421403 521
1 4427421403 521
1 44 8421403 521
1 44 9421401 521
1 44 5421403 121
1 4418421402 521
1 4411421401 521
1 4420421402 221
1 4419421403 521
1 4434421402 521
1 4417421401 521
1 4414421403 121
1 44 6421403 521
1 4432421402 821
1 4423421401 121
1 4411421413 121
1 4415421403 521
1 44 8421401 521
1 4412421403 921
1 4421421402 121
1 44 5421403 521
1 4432421402 521
1 4417421401 121
1 4420421403 121
1 44 8421402 121
1 44 3421403 521
1 4439421402 121
1 4411421403 121
1 4428421403 121
1 4418421403 521
1 44 8421401 521
1 4424421403 521
1 4420421402 121
1 44334214031021
1 4415421403 521
1 4424421403 121
1 4411421403 521
2 4430521303 221
2 4418521303 121
2 44 35213011021
2 4410521302 121
2 4415521301 521
2 4414521301 521
2 4425521301 121
2 44 9521301 521
2 4420521303 221
2 44 4521301 121
2 4412521303 121
2 4443521303 521
2 4427521303 121
2 4416521303 121
2 44 6521303 521
2 44115213031021
2 44135213031021
2 4423521303 821
2 44325213011121
2 4414521303 521
2 4423521303 721
2 44115213011121
2 44 4521301 521
2 4436521303 721
2 44115213011121
2 4425521302 121
2 44 9521303 121
2 4430521302 121
2 44 5521303 521
2 4414521301 921
2 4418521303 121
2 4415521302 121
2 44 1521303 121
2 4432521303 121
2 4427521301 621
2 4413521303 221
3 44 3521603 521
3 4422521603 521
3 44135216011021
3 4434521603 921
3 4410521601 121
3 44365216031121
3 4421521603 121
3 44175216031121
3 44 15216011121
3 4420521601 121
3 4421521603 721
3 44 3521602 121
3 4429521603 821
3 44 3521601 121
3 4411521603 121
3 4414521601 121
3 4413521602 121
3 44 5521601 121
3 4424521603 121
3 4416521601 721
3 44145216031021
3 4428521603 721
3 4424521602 521
3 4446521602 721
3 4437521602 121
3 4420521603 121
3 44 8521601 421
3 44 5521603 221
3 4422521603 521
3 44 3521603 521
3 4422521603 121
3 44215216031021
3 44435216031121
3 4414521603 121
3 44 4521603 521
3 44 1521601 521
3 44 3521601 821
3 4428521603 121
3 44 8521601 121
3 44195216031021
3 4430521603 121
3 4420521603 521
3 44 5521603 121
3 4455521602 521
3 4422521603 521
3 4410521603 521
3 4421521603 521
3 4430521601 521
3 4413521603 121
3 44 45216031121
3 4425521603 121
3 4439521603 121
2 4513461412 512
2 4526461402 112
2 45 7461403 112
2 45 4461403 112
2 45 5461411 112
2 4510461411 112
2 45 2461403 112
2 4514461412 512
2 45 6461401 112
2 45 5461401 612
2 4512461411 512
2 45 9461401 112
2 45 8461401 112
2 4511461403 112
2 45 6461403 312
2 4528461403 512
2 4517461403 112
2 4528461403 512
2 45 6461401 512
2 4518461403 512
2 4526461403 212
2 4523461412 612
2 4514461413 512
2 4515461413 512
2 45 8461403 112
2 4510461403 112
2 4529461402 512
2 45 6461401 512
2 4523461412 112
2 4519461411 112
2 45 6461401 112
2 4513461403 512
2 45 2461413 112
2 45 9461403 112
2 4518461402 112
1 46 4352011 131
1 46 2352011 531
1 4622352013 131
1 4614352013 531
1 4624352012 131
1 46 8352013 131
1 46 8352013 531
1 46 7352011 531
1 4619352013 131
1 4634352012 131
1 4613352012 531
1 46 6352013 131
1 46 6352011 531
1 4631352013 131
1 46 4352013 531
1 4644352012 731
1 4622352012 131
1 4620352012 531
1 46 4352011 131
1 4617352012 131
1 4620352012 131
1 46 7352013 531
1 4611352013 131
1 4618352013 131
1 4614352011 131
1 46 2352013 131
1 4647352012 831
1 4621352013 131
1 4610352011 131
1 4619352013 731
1 4622352012 131
1 4614352012 131
1 46 4352011 131
1 46 9352013 131
1 46 6352013 531
1 4611352011 531
1 4624352013 131
1 4634352012 131
1 4625352013 531
1 4627352012 531
1 4629352013 531
1 4646352012 131
1 46193520131131
1 46 9352013 131
1 46 3352013 131
1 4610352013 531
1 4621352013 531
1 4621352013 131
1 4617352013 531
1 4650352012 131
1 4626352013 131
1 46 1352013 131
1 4619352012 131
1 4618352013 631
1 46 3352011 131
1 4621352013 131
1 4617352013 131
1 46 8352013 131
1 46 9352013 131
1 4624352012 131
1 4624352013 131
1 4622352013 131
1 46 2352013 131
1 4610352013 131
1 4625352012 131
1 46 6352011 131
1 4618352013 631
1 4617352013 931
1 46 1352013 131
1 46 5352011 131
1 4613352013 531
1 4625352012 131
1 46 2352013 531
1 46 23520111031
1 4612352013 531
1 4621352011 131
2 4618361913 531
2 4639361913 531
2 4624361913 531
2 4618361913 131
2 46 4361911 531
2 4622361913 131
2 4631361912 131
2 46 3361913 731
2 46 3361913 531
2 4630361912 131
2 4636361912 531
2 4637361912 531
2 4625361913 131
2 4614361913 131
2 4616361913 531
2 4622361912 131
2 46 63619111031
2 4631361913 131
2 4618361913 531
2 46 9361913 131
2 46 9361913 131
2 4612361913 531
2 4613361913 131
2 4626361912 531
2 46273619121031
2 4622361913 631
2 4624361913 531
2 4610361913 531
2 46 1361913 131
2 46 8361911 531
2 46 3361912 131
2 46 8361913 131
2 4627361913 131
2 4623361913 131
2 46 3361913 531
2 4629361912 131
2 4622361912 131
2 4625361912 131
2 46 3361911 131
2 46 9361911 531
2 4643361912 531
2 4626361912 131
2 4616361911 131
2 4614361911 131
2 4622361913 131
2 4610361913 131
2 4619361913 131
2 4645361912 231
2 46183619111031
2 4627361913 131
2 4636361912 131
2 4636361913 531
2 4627361913 531
2 4615361911 131
2 4617361913 131
2 4624361912 131
2 46 8361912 131
3 4617362112 131
3 4625362113 531
3 4625362112 131
3 4618362113 131
3 4617362113 531
3 4610362113 131
3 4631362112 131
3 4617362112 131
3 4613362111 131
3 4612362111 131
3 4614362113 531
3 4622362112 131
3 4642362113 631
3 4615362111 531
3 46 2362111 531
3 4637362112 131
3 4626362113 131
3 4625362112 531
3 4613362113 531
3 4643362113 731
3 46 7362111 531
3 46 5362111 131
3 46 1362111 131
3 4626362111 231
3 4618362113 131
3 4623362113 531
3 4620362113 131
3 46103621131131
3 4613362113 531
3 46 8362112 531
3 4618362112 131
3 4620362113 131
3 4610362113 131
3 46 2362113 131
3 46203621131031
3 46 2362111 131
3 4637362112 131
3 4638362112 931
3 4613362111 531
3 4623362113 131
3 4623362111 631
3 4623362112 131
3 4616362112 531
3 4633362112 131
3 4630362112 131
3 4621362113 131
3 46 23621131131
3 4617362112 131
3 4627362112 131
3 4625362113 131
3 4610362113 131
3 4618362113 131
3 46 8362113 131
3 4622362112 131
3 4621362113 131
3 4617362113 131
3 4613362113 131
3 4615362113 131
3 46 2362113 131
3 4631362112 531
3 4628362113 131
3 46 9362113 531
3 4620362111 531
3 46 9362113 131
3 4612362113 531
1 4722461413 131
1 4719461413 731
1 47 3461411 131
1 47234614111031
1 4724461413 131
1 4732461412 131
1 4712461413 531
1 4718461413 531
1 4724461411 131
1 4728461413 131
1 47 8461411 531
1 4719461413 131
1 4722461413 631
1 47 4461411 131
1 4723461413 131
1 47114614111031
1 4716461412 131
1 47224614131031
1 4726461413 131
1 4722461413 131
1 4710461411 131
1 4718461413 131
1 4716461412 131
1 47 9461411 531
1 47 6461411 131
1 4710461411 131
1 4719461411 131
1 4712461413 131
1 47 84614131031
1 4729461412 131
1 4716461411 231
1 47 84614131031
1 4736461412 131
1 4717461411 131
1 4735461412 131
1 4713461411 131
1 4727461412 831
1 4723461413 131
1 4734461413 131
1 4718461412 131
1 4710461411 531
1 4728461411 531
1 4721461412 131
1 4723461412 131
1 47 8461413 131
1 4721461413 131
1 4715461413 131
1 47154614111131
1 4715461411 531
1 4715461413 131
1 4724461412 131
1 4725461413 131
1 4722461413 131
1 4720461413 531
1 4720461412 231
1 47154614111031
1 4721461413 531
1 4723461413 131
1 47 2461413 131
1 4724461412 131
1 4723461413 131
1 4724461412 131
1 47 9461413 131
2 4710641511 431
2 4713641513 131
2 4721641513 531
2 47126415111031
2 4710641511 131
2 4721641513 131
2 4719641513 531
2 4721641511 131
2 4723641513 131
2 4733641512 131
2 4727641512 131
2 4722641511 131
2 4732641513 131
2 4713641511 231
2 4711641513 831
2 47 6641511 131
2 4723641512 131
2 4722641512 531
2 4724641513 431
2 47 26415131031
2 4717641511 531
2 47 76415111031
2 47196415111131
2 47376415121131
2 4723641512 131
2 4728641513 531
2 4735641513 131
2 4726641513 131
2 4710641511 131
2 4721641511 131
2 4736641513 131
2 4722641511 131
2 4729641512 531
2 47196415131131
2 4715641513 431
2 4746641513 531
2 4725641512 131
2 47 9641513 531
2 4720641513 131
2 4721641513 531
2 4728641513 931
2 4721641511 531
2 4718641513 531
2 4731641512 531
2 4713641511 431
2 4710641512 131
2 47 9641511 131
2 47 8641513 131
2 4741641512 131
2 4738641512 631
2 4727641513 131
2 4730641513 131
2 47166415111131
2 4715641513 131
2 4731641512 831
2 4717641513 531
2 4719641513 131
2 4718641511 131
2 47 7641511 131
2 4718641513 531
2 4746641512 131
3 4718641313 131
3 4717641313 131
3 4723641313 131
3 4714641313 531
3 4731641313 131
3 4721641313 531
3 4713641311 131
3 4712641311 131
3 4715641311 231
3 4718641311 431
3 4716641313 131
3 4723641312 131
3 47 6641311 431
3 4716641313 131
3 4718641313 131
3 4731641313 131
3 4726641313 131
3 4721641313 131
3 4735641312 131
3 4735641312 531
3 4719641313 131
3 4710641311 531
3 4710641313 531
3 4714641313 131
3 4716641312 131
3 4721641313 531
3 4719641313 531
3 4714641313 131
3 4717641313 131
3 4719641311 431
3 4713641311 131
3 47 3641313 131
3 47266413111031
3 4714641311 131
3 47 7641313 131
3 4728641313 131
3 47 5641311 431
3 4732641312 131
3 4722641311 131
3 4729641312 731
3 4719641311 131
3 47 3641313 131
3 47 3641311 131
3 4717641313 531
3 4723641313 131
3 47 5641313 131
3 47256413111031
3 4723641311 131
3 4717641313 131
3 47406413131131
3 4731641312 131
1 48 1352503 111
1 4814352513 111
1 4830352502 111
1 4835352513 111
1 4818352513 111
1 4815352502 111
1 4815352503 111
1 4827352513 111
1 48 6352501 111
1 4832352512 111
1 4821352501 111
1 4834352502 111
1 4820352512 111
1 4825352501 111
1 4823352513 111
1 4838352502 111
1 4812352511 211
1 48 4352503 111
1 4848352512 111
1 4825352513 111
1 4841352502 111
1 4829352512 111
1 48 4352501 111
1 4830352502 111
1 4840352512 111
1 4832352502 111
1 4816352513 111
1 4812352511 111
1 4827352512 511
1 4834352503 111
1 4836352502 111
1 4815352503 111
1 4811352503 111
1 48 5352502 111
1 48 5352503 111
1 48 5352513 611
1 4835352502 111
1 4816352501 111
1 4836352512 111
1 48 4352501 111
1 48 3352511 111
1 4820352513 111
1 4836352502 111
1 4826352511 911
2 48 7412503 111
2 48 7412503 111
2 4811412501 511
2 4851412513 111
2 48 9412503 111
2 4813412513 111
2 4838412512 111
2 4860412502 111
2 4844412502 111
2 4831412503 111
2 4842412513 111
2 4811412501 711
2 4831412513 111
2 4835412503 111
2 4843412512 111
2 4845412512 211
2 4831412503 711
2 4833412513 111
2 4829412511 111
2 4830412513 111
2 4814412503 111
2 4825412503 111
2 4832412502 611
2 4838412512 511
2 4814412501 111
2 4812412511 311
2 48284125031111
2 4823412501 611
2 48 9412501 111
2 48 1412513 111
2 4829412503 111
2 4838412503 111
2 4857412512 111
2 4814412503 111
2 4829412502 111
2 4847412512 111
2 4841412513 111
2 4816412503 111
2 4832412503 611
2 4845412512 111
2 4823412513 111
2 48 8412503 111
2 4842412513 111
2 4829412503 111
2 4823412502 111
2 4820412501 111
2 4850412512 111
2 4816412511 511
2 4828412501 111
2 4836412502 111
2 4844412502 111
3 4855412812 111
3 4825412811 111
3 48 9412801 111
3 4854412802 111
3 4826412801 911
3 4852412802 111
3 4823412803 111
3 4818412811 911
3 4811412811 111
3 4850412802 111
3 4861412802 111
3 4822412803 111
3 4823412803 111
3 4852412802 111
3 4839412813 111
3 4818412813 111
3 48 8412801 111
3 4814412803 111
3 4828412812 111
3 4856412812 111
3 4827412811 911
3 4816412813 111
3 48 2412803 911
3 4849412802 111
3 4814412803 111
3 4810412813 911
3 4820412802 111
3 4835412812 511
3 4816412803 111
3 4813412813 111
3 4831412803 111
3 4836412813 111
3 4857412812 111
3 4842412803 711
3 4812412803 111
3 4815412813 111
3 4849412813 111
3 4849412813 111
3 4844412813 911
3 4850412802 711
3 4860412812 111
1 4920341703 521
1 4913341703 121
1 4925341703 521
1 4926341702 121
1 49 6341701 121
1 49 3341703 521
1 49 1341703 121
1 4922341703 521
1 4935341702 121
1 49 3341703 121
1 4928341703 121
1 4953341702 721
1 4923341703 521
1 4928341703 121
1 4945341702 121
1 4912341701 521
1 49173417011121
1 4953341702 121
1 4959341702 721
1 49 3341703 121
1 4933341702 221
1 49 4341701 121
1 4919341703 721
1 4912341701 521
1 4937341703 121
1 4954341703 921
1 49 7341703 121
1 4940341702 121
1 49 4341701 521
1 4923341703 121
1 4919341701 521
1 4911341701 321
1 49 1341701 121
1 4930341703 121
1 4923341702 121
1 4943341702 121
1 4960341702 121
1 49203417031121
1 4928341703 121
1 4945341702 121
1 4925341703 221
1 4933341703 521
1 49 3341703 121
1 49 4341701 121
1 4915341703 121
1 4913341703 121
1 4932341702 121
1 4927341701 721
1 49 5341701 121
1 4951341702 521
1 4924341703 121
1 49193417031121
1 49 7341703 121
1 4937341702 221
1 4927341701 721
1 49 2341703 121
1 4932341703 121
1 4914341701 121
1 49113417031121
1 4926341703 121
1 4931341703 821
1 4928341703 521
1 4915341703 121
1 49 7341703 121
2 4925502703 821
2 4918502703 121
2 4912502703 121
2 4944502702 121
2 4915502702 121
2 4914502703 121
2 4910502703 121
2 4927502703 121
2 4920502703 121
2 4933502702 121
2 4916502703 821
2 4922502703 121
2 4919502703 521
2 4912502703 221
2 4919502703 121
2 49115027021121
2 4920502703 221
2 4931502701 721
2 4911502701 121
2 4924502702 221
2 4919502703 121
2 49245027021121
2 4916502702 121
2 4913502703 821
2 4944502702 121
2 49 5502701 521
2 4915502703 121
2 4913502703 121
2 4927502703 721
2 4910502701 521
2 4923502703 121
2 4918502703 121
2 4919502703 121
2 4910502703 521
2 49265027031121
2 4933502702 121
2 4926502701 521
2 4915502703 121
2 4915502701 121
2 4939502702 121
2 4946502703 821
2 4910502703 121
2 4949502702 621
2 4940502702 221
2 49 3502701 921
2 4936502702 121
2 49135027031021
2 4910502703 121
2 4945502702 721
2 49345027021121
2 4937502702 121
2 4939502702 121
2 49 8502703 121
2 4915502703 521
2 49 7502701 521
2 4920502701 821
2 4924502702 221
2 49175027021121
2 4940502702 121
3 4941501803 121
3 4915501803 121
3 4914501803 521
3 4947501803 121
3 4919501803 121
3 4922501801 521
3 4912501803 521
3 4914501801 521
3 4921501803 521
3 49 6501801 121
3 49 7501803 121
3 4925501803 521
3 49 6501801 521
3 4934501803 121
3 49 6501803 521
3 49 9501803 121
3 4915501803 521
3 4925501803 121
3 4963501803 721
3 4940501802 121
3 4936501802 121
3 4918501803 521
3 4948501803 121
3 4914501803 121
3 4950501802 221
3 4912501803 521
3 4947501802 121
3 4920501803 521
3 4914501803 121
3 4916501802 121
3 4912501801 521
3 49 3501801 521
3 49 3501803 121
3 4911501803 121
3 4925501803 121
3 49 7501803 121
3 4917501803 121
3 4914501801 521
3 4930501802 121
3 49 4501803 121
3 4916501803 521
3 49 3501801 521
3 4911501803 121
3 4916501803 521
3 4924501802 121
3 4937501803 121
3 4925501803 521
3 49 2501801 121
3 49 4501801 121
3 4930501803 521
3 4917501803 121
3 4923501803 521
3 4912501802 121
3 5020402103 221
3 50 8402103 121
3 5022402103 121
3 5025402102 121
3 5022402102 121
3 50274021021121
3 5022402102 121
3 50104021031121
3 5025402102 121
3 5025402102 121
3 5018402103 521
3 5027402102 121
3 5040402102 121
3 5024402102 121
3 5029402102 121
3 5024402103 521
3 5012402103 121
3 50 7402103 521
3 5022402103 221
3 5017402103 521
3 5012402103 521
3 5032402102 121
3 5010402103 521
3 50 44021031121
3 5016402103 121
3 5015402103 521
3 50 4402103 121
3 50 4402103 121
3 50 4402103 121
3 5014402102 121
3 5024402101 121
3 5025402103 821
3 5029402103 521
3 50 6402101 521
3 5026402103 121
3 50 1402103 121
3 5013402103 121
3 5018402102 621
3 50 8402101 521
3 5042402103 121
3 5014402103 121
3 5035402102 121
3 5021402101 321
3 5022402102 521
3 50 5402101 521
3 50 44021031121
1 5120451503 621
1 5130451501 221
1 51 44515011021
1 5113451502 121
1 5120451503 121
1 5121451503 121
1 5112451503 521
1 51 8451501 621
1 5114451502 121
1 51 2451501 121
1 51 5451501 621
1 5123451503 121
1 5119451503 421
1 51 5451502 121
1 5124451503 521
1 51 4451501 521
1 51144515031121
1 51234515031121
1 5118451503 121
1 51 7451503 521
1 51 6451503 121
1 51 7451501 521
1 5118451503 121
1 51 3451501 621
1 5125451503 121
1 5118451501 521
1 51 4451501 221
1 5112451501 121
1 5124451503 121
1 51 7451501 421
1 5116451503 521
1 5117451503 121
1 51 2451503 121
1 5113451501 521
1 5116451501 421
1 5116451503 121
1 5131451503 121
1 5117451502 121
1 5129451502 121
1 51 5451503 121
1 51 54515011021
1 51 4451501 121
1 51 4451503 621
1 5118451503 521
1 5113451501 121
1 51 6451501 521
1 51 6451502 121
2 5116671302 121
2 5115671301 121
2 5129671303 521
2 5147671302 621
2 5121671303 121
2 5110671303 121
2 5110671302 121
2 51 4671301 521
2 5130671302 721
2 51 1671303 121
2 5119671301 121
2 5110671301 521
2 5129671303 621
2 5112671301 821
2 51 86713011021
2 51 8671303 621
2 5129671303 521
2 5116671303 121
2 5121671303 121
2 5116671303 121
2 5114671301 721
2 51 2671301 121
2 51136713011021
2 5113671302 721
2 5122671303 521
2 51 1671303 521
2 5113671303 121
2 5142671302 521
2 5119671303 721
2 5137671302 821
2 51 8671301 621
2 5113671302 121
2 51 4671301 121
2 51 9671303 121
2 51 4671303 121
2 51 6671303 121
2 5111671302 121
2 5119671302 121
2 5128671303 121
2 5133671302 521
2 5113671303 121
2 5139671302 921
2 5111671301 721
2 51 4671303 921
1 52 7452111 111
1 5214452101 111
1 5216452103 111
1 5215452113 111
1 5229452113 111
1 52 7452112 111
1 5231452112 111
1 5224452113 111
1 52 4452101 111
1 5223452113 111
1 5220452103 111
1 52284521011111
1 5221452111 111
1 5219452103 111
1 5215452102 111
1 5210452101 111
1 52 3452111 111
1 52 1452101 111
1 52 1452113 111
1 5238452112 111
1 5219452113 711
1 5230452102 111
1 5232452102 111
1 5212452111 111
1 5234452112 111
1 52 9452113 111
1 5236452113 111
1 52114521031111
1 5214452103 411
1 52 4452102 111
1 52 5452101 611
1 5225452113 511
1 5221452102 111
1 5213452113 111
1 5211452101 111
1 5220452111 111
1 52 2452103 111
1 5217452102 111
1 5219452112 111
1 5222452113 111
1 52 2452103 111
1 5241452103 111
1 52 1452111 111
1 52 8452101 111
1 5221452111 111
1 52 7452112 111
1 5221452111 111
1 5238452112 111
1 5213452113 111
1 52 2452103 111
1 5231452102 111
1 5214452103 111
1 5212452102 111
1 5225452102 111
2 52 8532401 111
2 5211532402 111
2 52 5532403 111
2 5231532413 111
2 52 9532403 811
2 5221532413 111
2 52 2532402 111
2 5236532402 111
2 5215532413 111
2 5221532403 611
2 52 4532413 111
2 52 4532403 111
2 52 2532411 111
2 52 8532401 511
2 5237532403 211
2 5220532413 111
2 5231532402 111
2 5224532401 811
2 52 5532401 111
2 5243532402 111
2 5221532413 511
2 5215532403 111
2 5229532402 111
2 5216532403 511
2 5214532402 711
2 52 1532401 511
2 5234532402 111
2 5216532402 111
2 5223532402 111
2 5241532402 111
2 5222532412 111
2 5212532413 111
2 52 7532413 111
2 52 2532403 911
2 52 9532403 511
2 52 2532402 111
2 5233532402 111
2 52 1532403 111
2 5224532412 111
2 5224532412 111
2 5219532403 111
2 5241532402 111
2 5228532412 111
2 52 5532403 511
2 5222532412 511
2 5222532403 111
2 5225532402 111
2 5230532402 111
2 5226532401 111
3 52 5532102 111
3 5213532102 111
3 5233532113 111
3 52 3532101 111
3 5243532102 111
3 52 6532103 111
3 5244532102 111
3 5214532103 111
3 52 2532101 111
3 52 1532101 111
3 52 7532103 111
3 5236532102 111
3 5249532102 111
3 5229532103 511
3 5221532113 111
3 5210532113 111
3 52 7532113 111
3 5219532103 111
3 5236532102 111
3 52255321121111
3 52 3532111 111
3 5240532102 111
3 52 7532102 111
3 5241532102 111
3 52255321121111
3 5213532112 111
3 5212532113 111
3 5210532103 111
3 5224532113 111
3 5246532102 111
3 52175321011111
3 52 7532111 111
3 5214532103 111
3 5227532112 111
3 5225532103 111
3 5221532103 111
3 5213532103 111
3 52 4532103 111
3 5232532102 111
3 52 4532101 111
3 52 4532113 511
3 52 6532111 111
3 5239532112 111
3 5221532113 111
3 5225532113 111
3 52 9532103 111
3 5225532103 111
3 5214532103 111
3 5217532113 111
3 5214532112 111
3 5231532103 111
3 52105321131011
3 5213532103 111
3 5216532113 111
1 5315382013 511
1 5319382002 111
1 5310382012 111
1 5320382013 111
1 5321382001 111
1 5325382012 111
1 53 7382001 111
1 5318382013 311
1 5316382003 111
1 53 1382003 111
1 5346382002 111
1 5310382003 111
1 5324382003 511
1 5319382002 511
1 53 6382013 111
1 5319382003 111
1 5314382001 111
1 5339382013 711
1 53 6382013 111
1 53 9382011 111
1 53 1382001 111
1 53 3382001 111
1 5318382002 111
1 53 5382003 111
1 53 6382011 111
1 5318382003 111
1 5331382002 711
1 5321382003 111
1 53213820111011
1 5323382003 111
1 5329382012 111
1 5322382003 511
1 5330382003 811
1 5318382013 111
1 5315382013 111
1 53 83820011011
1 5327382002 511
1 5324382012 511
1 5320382003 111
1 5320382013 511
1 53 1382001 111
1 53 7382003 511
1 5311382003 511
1 53 9382003 111
1 5312382002 511
1 5312382013 111
1 5314382011 111
1 5327382012 911
1 53 1382013 111
1 53 2382003 511
1 5428143512 133
1 5416143513 133
1 54 7143511 133
1 5430143513 133
1 54361435121133
1 5410143511 533
1 5421143513 133
1 5437143512 133
1 54331435121133
1 5420143513 133
1 54351435131133
1 5438143512 933
1 5447143512 133
1 5411143513 233
1 5423143513 133
1 5456143512 933
1 5416143511 133
1 5421143513 133
1 5437143512 133
1 54151435131133
1 5428143513 133
1 54131435131133
1 5425143513 533
1 5415143513 233
1 5436143512 133
1 5416143513 133
1 5440143512 133
1 54 6143513 133
1 5416143511 533
1 5434143512 133
1 5437143512 133
1 54 4143511 133
1 5421143513 533
1 5432143513 733
1 5436143512 133
1 5430143512 133
1 5424143513 133
1 5452143512 533
1 54251435131133
1 54 7143513 133
1 5427143513 533
1 5410143511 133
1 54 5143512 133
1 54281435131133
1 5435143513 733
1 5428143513 733
1 54 2143511 133
1 5418143513 233
1 5423143512 133
1 5423143512 133
1 5452143512 133
1 5444143512 133
2 5414313613 533
2 5419313613 433
2 5427313612 133
2 5447313612 733
2 5422313613 833
2 5444313612 133
2 5427313613 133
2 5425313613 133
2 5420313611 133
2 5438313612 233
2 5411313613 533
2 54413136131133
2 54213136131133
2 5422313613 533
2 54 7313612 233
2 5431313612 133
2 54 63136111133
2 54393136121133
2 5427313612 133
2 5448313612 133
2 54363136131133
2 5437313612 233
2 5423313613 133
2 54143136131133
2 5416313613 133
2 5433313612 133
2 54 8313613 133
2 5431313613 133
2 5420313613 133
2 5418313613 133
2 5411313613 133
2 5430313612 533
2 5419313613 133
2 5421313611 133
2 5413313612 133
2 5426313613 133
2 54233136131133
2 54233136121133
2 54193136131133
2 5427313613 133
2 54133136131133
2 54173136131133
2 54163136111133
2 54343136121133
2 54313136121133
2 54463136121133
2 5430313613 133
2 5441313613 133
2 5421313613 133
2 5410313613 133
2 5425313613 133
2 5423313612 133
2 5418313612 133
3 5435313012 133
3 54493130131133
3 5428313012 133
3 54173130131133
3 54183130131133
3 54213130131133
3 5415313013 133
3 54443130121133
3 5428313013 133
3 5435313013 733
3 5429313013 133
3 5429313013 133
3 5414313013 133
3 5413313011 133
3 5427313012 133
3 5442313012 133
3 5428313012 133
3 54 3313011 133
3 5422313013 133
3 54133130131133
3 5415313011 133
3 5413313012 133
3 5413313013 533
3 54543130121133
3 5416313013 133
3 5429313012 133
3 5445313012 133
3 54353130121133
3 5447313012 133
3 5431313012 133
3 5417313011 133
3 5439313013 133
3 54223130131133
3 54163130131133
3 54373130121133
3 5431313013 133
3 5427313013 133
3 5437313012 233
3 5423313013 133
3 5445313012 233
3 5410313011 533
3 54 93130111133
3 5412313013 133
3 5445313013 233
3 54453130121133
1 5528192912 133
1 55521929121133
1 5534192913 133
1 5554192912 133
1 5512192911 133
1 5517192911 533
1 5526192913 133
1 5550192912 133
1 5527192913 133
1 5530192913 133
1 5523192913 133
1 5539192912 133
1 5543192912 133
1 5531192913 133
1 5519192913 133
1 5516192913 133
1 5531192913 133
1 5518192911 133
1 55 9192911 133
1 5523192913 133
1 5525192911 133
1 5558192912 133
1 5533192913 133
1 5522192913 133
1 55241929131133
1 5545192912 133
1 5559192912 133
1 55361929131133
1 5523192913 133
1 5538192912 133
1 5526192911 133
1 5531192912 133
1 5518192913 133
1 5535192913 133
1 5546192912 133
1 5515192913 133
1 5516192912 133
1 5527192913 133
1 55241929111133
1 5540192913 133
1 5517192911 133
1 5513192911 133
1 55291929131133
1 5523192913 133
1 55281929111133
1 5549192912 133
1 5539192913 133
1 55 1192913 133
1 5513192913 133
1 5532192913 133
1 5521192913 133
1 5529192913 533
1 5529192912 133
1 5553192913 133
1 5537192912 133
1 5541192913 133
1 5529192912 133
1 5540192912 233
1 55451929131133
1 5516192913 133
1 5511192913 133
1 55321929121133
1 5549192912 133
2 5533222713 133
2 5546222712 133
2 55272227111133
2 5516222713 133
2 5540222713 133
2 5533222713 133
2 55362227131133
2 55322227131133
2 5522222713 133
2 5546222713 133
2 5547222712 133
2 5528222712 133
2 5533222712 133
2 5520222713 133
2 5534222711 133
2 5519222713 133
2 5535222712 133
2 5529222713 133
2 55572227121133
2 5518222713 133
2 5526222713 133
2 55502227121133
2 5530222711 133
2 5519222713 133
2 5551222712 133
2 55432227121133
2 5513222711 133
2 5520222711 133
2 5519222713 133
2 55402227131133
2 5536222712 133
2 5536222713 133
2 55 9222713 133
2 5544222713 133
2 5526222711 133
2 5532222713 133
2 5534222712 133
2 5540222713 133
2 5528222713 133
2 5537222712 133
2 5520222713 133
2 5531222713 133
2 5538222713 133
2 5528222713 133
2 5527222713 133
2 5518222713 133
2 5520222711 133
2 5521222713 133
2 5529222713 133
2 5510222711 133
2 5540222713 133
3 5553222713 933
3 5557222712 133
3 5526222712 133
3 5526222713 133
3 5551222712 133
3 5531222713 133
3 55412227121133
3 5549222712 133
3 5548222712 133
3 5530222713 133
3 5531222713 133
3 55212227111133
3 55602227121133
3 5552222712 133
3 5519222713 133
3 5546222712 133
3 5534222711 533
3 5520222713 133
3 55 7222711 133
3 55212227111133
3 5551222712 733
3 5540222713 133
3 5530222713 133
3 55 3222713 133
3 5529222713 233
3 5548222712 133
3 5518222713 133
3 5516222712 133
3 5533222713 133
3 5524222713 133
3 5520222713 133
3 5552222713 133
3 5537222713 133
3 5551222713 133
3 5518222713 133
3 5537222713 133
3 55 6222711 133
3 5545222712 533
3 5548222712 133
3 5519222713 233
3 5514222713 133
3 5552222712 133
3 5526222713 133
3 55302227111133
3 5534222711 133
3 5541222713 133
3 5519222713 533
3 5547222712 133
3 5532222713 133
3 55432227121133
3 5534222713 133
3 55262227131133
3 5528222711 133
3 55 9222711 233
3 5533222712 533
3 5533222713 133
3 5547222712 133
3 5527222713 533
3 5538222711 133
3 5542222713 133
3 5527222713 133
3 5524222712 133
3 5545222713 133
3 5524222713 133
3 5527222713 133
3 5523222713 133
3 5538222712 133
3 5537222713 533
3 5540222713 133
3 5531222713 533
1 5639152313 132
1 5645152313 132
1 5626152313 532
1 5614152311 132
1 5633152313 132
1 56 7152311 132
1 5622152313 132
1 5638152313 532
1 5627152312 532
1 5649152312 132
1 5622152313 132
1 5647152313 132
1 5621152313 132
1 56431523121132
1 5619152311 132
1 56431523121132
1 5640152312 132
1 56 9152311 532
1 5617152311 532
1 5618152313 132
1 5626152313 132
1 5610152313 132
1 5629152311 132
1 5623152312 132
1 56 61523131132
2 5650202913 132
2 5635202913 132
2 5640202912 132
2 5645202912 132
2 5632202913 132
2 5624202912 132
2 5622202912 132
2 5629202913 132
2 5648202912 132
2 5633202912 132
2 5616202913 132
2 5622202913 532
2 5617202913 132
2 56 8202911 532
2 5631202913 132
2 5625202913 132
2 5623202913 132
2 56 3202913 132
2 5624202913 132
2 5625202913 132
2 5618202911 132
2 5629202913 532
3 5619203311 532
3 5617203312 132
3 5632203313 532
3 5646203312 132
3 5620203313 132
3 5635203313 732
3 5634203313 132
3 5619203313 532
3 5615203313 532
3 5643203312 532
3 5636203312 532
3 5631203312 132
3 5656203312 132
3 5647203313 132
3 5628203313 132
3 56 9203311 532
3 56582033121132
3 5641203313 132
1 5723701003 111
1 5727701012 111
1 57 6701001 111
1 5724701013 511
1 57 7701011 111
1 5713701001 111
1 5743701002 111
1 5737701011 111
1 57 9701013 111
1 5761701002 111
1 57 1701013 111
1 5720701003 111
1 5715701013 111
1 5743701013 111
1 5720701013 111
1 5722701002 111
1 57 7701013 411
1 57227010031011
1 57 4701013 111
1 5715701013 111
1 5724701003 111
1 5714701011 111
1 5726701013 511
1 5734701012 111
1 5730701003 511
1 5722701001 411
1 5716701003 411
1 5713701013 111
1 5712701011 111
1 5710701003 111
1 57 9701003 711
1 57 9701011 111
1 5711701001 511
1 5716701013 111
1 57 4701013 111
1 5730701013 111
1 5719701001 111
1 57 9701003 111
1 5725701001 911
1 57 1701003 111
1 5715701003 911
1 5714701013 111
1 5725701003 111
1 57107010031111
1 5721701003 111
2 5758591402 511
2 5721591411 111
2 5723591411 711
2 5739591412 211
2 5723591403 511
2 57 2591403 111
2 5722591403 411
2 5723591401 111
2 5722591411 111
2 5733591403 511
2 57 2591413 511
2 5718591413 111
2 5729591402 111
2 5715591403 111
2 5731591403 511
2 5739591413 111
2 5731591412 111
2 5723591411 111
2 5715591401 111
2 5721591411 111
2 5765591402 411
2 57 6591413 111
2 57 2591401 111
2 57 7591411 111
2 57 6591411 111
2 5715591413 111
2 57 6591401 111
2 5722591403 111
2 5726591401 411
2 5716591411 811
2 5729591403 111
2 57 1591401 111
2 57 1591413 111
2 5722591402 511
2 57 6591413 111
2 5719591411 511
2 5711591403 111
2 5734591413 111
2 5725591413 111
2 5723591403 111
2 5712591411 511
2 57255914011011
2 5714591411 111
2 5719591413 111
2 5728591403 111
2 5721591413 111
2 5727591402 111
2 57 1591411 111
2 57 5591411 111
2 5717591411 111
2 5715591413 111
2 57 2591403 111
2 57 1591401 411
2 5724591403 111
2 57 7591401 111
2 5746591403 311
2 57 4591401 111
2 57 4591401 111
3 5723591413 111
3 57 4591401 111
3 5719591401 411
3 5719591413 111
3 57 5591401 111
3 5727591413 111
3 5728591403 111
3 5723591411 111
3 5714591411 111
3 5730591403 111
3 5729591413 111
3 5726591413 511
3 5712591411 111
3 57 3591413 111
3 5711591413 111
3 5728591403 111
3 57 7591401 111
3 5732591412 111
3 57 6591411 111
3 5724591402 511
3 5713591401 111
3 5719591411 111
3 5719591413 111
3 5724591403 111
3 5720591411 111
3 5740591402 111
3 5725591412 111
3 5750591402 311
3 5719591413 111
3 5713591401 411
3 57 5591413 111
3 5742591412 111
3 5749591412 911
3 5712591401 111
3 5743591413 111
3 5721591403 411
3 5732591402 111
3 5721591402 511
3 5718591403 111
3 5730591413 111
3 5734591402 111
3 5731591413 411
3 57 6591402 111
3 5717591403 111
3 5713591403 111
3 5710591403 111
3 5724591403 111
3 5718591403 111
3 5727591412 111
3 5724591403 111
3 5723591413 111
2 58 8671801 111
2 58 6671803 311
2 5838671802 811
2 58 7671801 311
2 58 3671803 111
2 5839671812 711
2 58 7671811 411
2 58 5671803 511
2 5823671811 911
2 58 2671803 511
2 58 3671801 111
2 5825671811 911
2 58 6671811 311
2 5822671803 311
2 5812671811 511
2 58 1671801 311
2 5810671803 511
2 58 26718111011
2 58 4671803 111
2 5820671802 111
2 58186718021111
2 5811671802 111
2 5823671802 511
2 5820671802 711
2 5824671812 511
2 5837671813 911
2 58 1671803 111
2 5813671803 111
2 5840671802 311
2 58 8671811 511
2 58156718031111
2 5826671812 511
2 58 9671803 111
2 5834671802 111
2 5830671802 711
2 58 1671803 511
2 58 1671801 511
2 5839671812 311
2 5816671803 111
2 58196718131111
2 58 4671803 111
2 5818671802 111
2 5817671813 311
2 5844671802 711
3 5823671402 111
3 5822671401 411
3 58 8671413 511
3 58 6671411 511
3 58 4671413 411
3 5825671413 111
3 58136714031111
3 58 7671413 411
3 58 8671403 611
3 5817671413 311
3 5812671413 111
3 58 3671413 311
3 58 4671403 811
3 58 3671401 411
3 5831671413 311
3 5812671403 811
3 5823671413 911
3 5830671403 111
3 5840671402 911
3 58 56714111111
3 5811671411 511
3 58276714021111
3 5837671402 311
3 5825671403 111
3 58 2671401 411
3 58 4671401 311
3 58 16714011111
3 5817671413 811
3 5813671402 511
3 58 3671411 211
3 58 5671403 111
3 58 7671403 411
3 5815671403 811
3 58 7671401 511
3 5822671413 511
3 5832671402 511
3 5829671402 111
3 5811671411 411
3 58236714031111
3 5814671411 511
3 5842671402 511
3 5811671401 511
3 5829671401 411
3 5810671403 211
1 59 9252701 121
1 5937252702 121
1 5911252702 121
1 5921252703 121
1 5917252703 121
1 59 2252701 121
1 59152527031121
1 5917252702 121
1 5916252703 121
1 59 8252703 121
1 5915252702 121
1 5931252702 121
1 5935252702 521
1 5921252701 121
1 5918252703 121
1 5927252702 121
1 5923252702 121
1 59 8252701 121
1 59 5252703 121
1 59 1252702 121
1 5916252703 521
1 5911252702 121
1 59 3252701 121
1 5910252703 121
2 5923432802 121
2 5922432803 121
2 5921432803 121
2 5924432803 121
2 5916432803 121
2 5932432803 121
2 5938432802 121
2 5916432803 121
2 5925432802 221
2 5928432802 121
2 5933432801 121
2 5916432802 121
2 5925432803 121
2 5927432803 121
2 5912432803 121
2 59 5432803 121
2 59 2432801 121
2 5924432802 121
2 5911432803 121
3 59 8432401 121
3 59 9432401 521
3 5923432403 121
3 59 7432401 121
3 59 6432403 121
3 5928432402 121
3 59 9432401 121
3 5953432403 121
3 59 7432401 121
3 59 34324031121
3 5917432402 121
3 5927432402 121
3 5914432403 121
3 5943432402 121
3 59 2432401 121
3 5923432402 121
3 5930432403 121
3 5921432401 121
3 59 9432403 121
3 5925432403 121
3 5929432402 121
3 59 9432403 121
3 59 6432401 121
3 5916432403 121
3 5918432403 721
3 59 9432401 121
3 5926432402 521
3 5910432402 121
3 59 5432401 121
3 5914432403 121
3 59 3432403 121
3 5915432402 121
3 5922432403 521
1 6031282802 111
1 6013282813 511
1 60 3282803 111
1 6016282813 111
1 6020282803 111
1 6014282813 111
1 60 3282803 111
1 60 5282813 111
1 60 6282811 111
1 6017282813 511
1 60 1282803 111
1 60 8282802 111
1 6020282813 111
1 6036282802 111
1 6021282803 111
1 6029282812 111
1 6019282803 111
1 6040282802 111
1 6044282812 111
1 6015282813 111
1 6027282811 111
1 6019282803 111
1 6043282813 111
1 6023282813 111
1 60 8282801 111
1 6028282812 111
1 6043282812 111
1 6015282813 111
1 60 7282811 511
1 6015282813 111
1 60 1282801 111
1 6012282813 511
1 60 4282802 111
1 60 7282813 111
1 6021282803 111
1 6024282813 111
1 6042282812 711
1 6010282803 111
1 6012282803 511
1 60 2282803 111
1 60 8282811 111
1 60 9282813 111
1 60 6282813 111
1 6024282813 111
1 6021282803 111
1 6010282813 111
1 6019282803 111
1 6038282812 111
1 60 6282813 111
1 60 8282803 111
1 6028282812 511
1 6013282813 111
1 6016282802 111
1 6021282813 511
1 6023282803 511
1 60 7282803 111
1 60 4282813 111
1 6021282813 511
1 60 7282811 111
1 60 9282802 111
1 6025282812 511
1 6043282812 111
1 60 3282813 111
1 6048282802 111
1 6018282812 111
1 6028282812 111
1 6014282813 111
1 6017282803 111
1 6026282802 111
1 6035282813 111
1 6015282812 111
1 6027282802 111
1 6044282812 511
1 6032282803 111
1 6016282813 111
1 6019282812 111
1 6035282803 111
1 6011282813 111
1 6026282813 111
1 6017282803 111
1 6012282801 111
1 60 8282802 511
1 6014282811 111
1 6032282812 111
1 6011282813 511
1 6024282802 111
1 6011282812 111
1 6043282813 111
1 6010282803 511
1 6011282812 111
1 6010282813 111
1 6020282813 111
1 60 7282803 111
1 6026282812 511
1 6019282813 511
1 6010282813 111
1 6010282802 111
1 60 9282812 111
1 60 6282803 511
1 6012282812 111
3 60 1302001 111
3 6028302003 111
3 6027302003 111
3 6014302013 111
3 6012302013 111
3 6021302013 111
3 6037302013 911
3 6019302013 111
3 6011302003 111
3 6018302003 111
3 6018302011 111
3 6018302013 111
3 60 4302003 111
3 6011302013 111
3 6032302002 111
3 6041302012 111
3 6015302003 111
3 60 3302001 111
3 6013302001 111
3 60 5302001 111
3 6020302001 111
3 6010302013 111
3 6029302013 111
3 6012302003 111
3 6023302013 111
3 60 7302003 111
3 6012302011 511
3 60183020131011
3 6038302012 111
3 60 7302003 111
3 6019302003 111
3 6041302012 111
3 6025302013 111
3 60 1302003 111
3 6021302012 111
3 6018302003 111
3 6035302002 111
3 60 3302013 111
3 6020302013 111
3 6017302013 111
3 60 9302011 111
3 6022302013 111
3 60 2302002 111
3 6023302002 111
3 6021302002 111
3 6013302013 111
3 6015302013 111
3 60 1302001 111
3 6029302003 111
3 6022302003 111
3 6018302011 111
3 6018302003 111
3 6032302002 111
3 6011302003 111
3 6022302002 111
3 6029302013 111
3 6017302011 111
3 60 5302001 111
3 6013302002 111
3 6020302012 111
3 6023302013 111
3 6025302002 111
3 60 5302013 111
3 6011302011 111
3 6028302003 111
3 60 3302013 111
3 60 1302013 111
3 6037302002 111
3 6055302002 111
3 6026302002 111
3 6024302013 111
3 6020302013 111
3 6043302002 111
3 6014302013 511
3 60 5302001 111
3 6050302012 111
3 6018302013 111
3 6049302012 111
3 6039302002 111
3 6012302001 111
3 6031302003 111
1 6131372312 131
1 61 9372312 131
1 6111372311 531
1 6121372313 131
1 6134372312 131
1 61 2372313 131
1 6119372313 531
1 61 7372313 131
1 6123372312 131
1 61 2372311 131
1 61 5372312 131
1 61 7372312 131
1 6120372313 131
1 6114372313 531
1 6114372313 531
1 6113372313 131
1 6141372312 131
1 61 9372311 131
1 6131372312 131
1 61 5372313 131
1 6113372313 131
1 6116372312 131
1 6144372312 731
1 61 7372313 131
1 6153372312 131
1 6118372313 831
1 61 7372313 131
1 6132372312 131
1 6120372313 131
1 6166372312 131
1 6114372313 131
1 61 8372312 531
1 6122372313 531
1 6115372313 531
1 6160372312 131
1 6115372311 831
1 6115372313 131
1 6159372312 131
1 61 4372311 531
1 6110372311 131
1 6113372311 531
1 6137372312 131
1 6118372313 131
1 61 5372313 131
1 6112372311 131
1 6112372313 231
1 6137372312 531
1 6136372312 131
1 61 7372313 131
1 6114372313 131
1 6128372313 531
1 6117372311 831
1 6169372312 231
1 61373723131031
1 61 8372313 231
1 6111372311 131
1 6110372313 131
1 61 6372312 131
1 61 3372311 831
1 6124372313 531
1 6110372313 131
1 6133372313 531
1 6115372313 531
1 6112372313 531
1 61 8372313 531
1 6119372313 531
1 6110372313 531
1 6127372312 131
1 6120372313 131
1 61 4372311 131
1 6132372312 131
1 6121372313 531
1 61 3372313 531
1 6150372312 231
1 6221351913 111
1 62163519031111
1 6213351912 111
1 6230351912 111
1 62 9351901 511
1 6242351912 111
1 62 4351913 111
1 6236351913 711
1 6226351913 111
1 62 5351912 111
1 6217351901 111
1 6240351912 111
1 62 7351903 111
1 6222351913 111
1 62 2351913 111
1 6225351911 411
1 6213351913 111
1 6245351912 111
1 62 5351913 111
1 62 7351912 111
1 62 6351903 111
1 6212351911 111
1 62 6351903 111
1 6210351902 111
1 6256351913 111
1 62 2351901 111
1 6227351913 111
1 62 6351901 111
1 62163519031011
1 62 8351913 111
1 6218351902 111
1 6212351912 111
1 6227351913 111
1 6218351903 711
1 62 7351913 111
1 62 4351901 111
1 6239351912 111
1 6216351903 111
1 62 1351903 111
1 62 3351903 111
1 6222351903 111
1 6256351912 111
1 6225351903 111
1 6239351912 111
1 6230351902 111
1 6225351902 111
1 6227351902 111
1 6215351901 111
1 62 1351911 111
1 6239351912 111
1 62 8351903 111
1 6214351913 111
1 6217351903 111
1 6213351911 111
2 6216522002 111
2 6259522002 111
2 6210522003 111
2 6229522012 111
2 6211522003 111
2 6248522002 111
2 62 4522003 111
2 62 3522003 111
2 6225522013 111
2 6214522013 111
2 6221522012 111
2 62 7522003 111
2 6238522012 111
2 6229522013 111
2 6216522003 111
2 6225522012 111
2 6241522012 111
2 6218522013 111
2 6216522012 111
2 62 1522001 111
2 6239522012 111
2 62 3522001 111
2 62 2522011 111
2 6230522012 111
2 6243522002 411
2 6245522012 111
2 62 2522011 111
2 62 3522001 111
2 6225522013 111
2 6213522013 111
2 62 5522001 111
2 6211522012 111
2 62 8522003 111
2 6213522002 111
2 62 3522003 111
2 6228522013 111
2 6211522003 711
2 6213522013 111
2 62 6522013 111
2 62 1522013 111
2 6213522011 111
2 6217522012 111
2 62 2522001 511
2 62 7522003 111
2 62 8522013 111
2 6213522013 111
2 6216522003 111
2 6210522001 111
2 6213522013 111
2 6244522013 111
2 6222522003 411
2 6221522013 111
2 6213522013 611
2 62 7522001 311
2 6216522003 111
2 62 5522011 111
2 62 2522013 111
2 6229522002 111
2 62 7522001 111
2 6210522003 111
2 6246522012 511
3 6228521313 111
3 62375213111111
3 6240521312 111
3 6215521311 111
3 6241521303 111
3 6218521303 411
3 6227521313 111
3 62 8521303 111
3 6227521313 111
3 62 9521301 111
3 6217521303 111
3 62 7521301 111
3 6238521302 111
3 6217521313 111
3 62 4521302 111
3 62 9521301 811
3 62 7521301 411
3 62 9521301 111
3 6214521303 111
3 6219521312 111
3 6244521312 111
3 62365213031011
3 6233521312 511
3 6231521313 111
3 6229521313 111
3 6237521313 111
3 6242521313 111
3 62 6521303 111
3 62 8521301 411
3 6237521302 111
3 6224521313 111
3 6229521312 111
3 6211521313 111
3 6245521312 511
3 62 2521311 111
3 6244521303 111
3 62 8521303 211
3 6211521313 111
3 6222521303 411
3 62395213131111
3 62 1521301 111
3 6217521311 111
3 62 9521303 111
3 62 1521301 111
3 62 1521311 111
3 6253521303 111
3 62 3521312 111
3 62 5521311 111
3 62 4521303 111
3 6238521312 111
3 62 1521313 111
3 6211521313 111
3 6240521303 111
1 6322541512 133
1 63235415131133
1 6316541511 133
1 63 9541511 533
1 63525415121133
1 6321541513 133
1 6319541513 133
1 6322541513 133
1 63365415131133
1 63265415131133
1 6321541513 133
1 6311541511 533
1 6338541513 633
1 6317541512 533
1 6310541513 133
1 63 7541513 133
1 6321541512 133
1 6319541513 133
1 63 75415111133
1 6338541513 133
1 6319541511 133
1 6314541511 133
1 6320541513 333
1 6329541513 133
1 6329541512 133
1 6324541513 133
1 6326541512 133
2 6317622313 133
2 6334622312 133
2 63 8622311 733
2 6326622313 133
2 63456223121133
2 6339622312 133
2 6310622311 133
2 6323622313 133
2 63 3622311 633
2 6338622313 533
2 63216223131133
2 6327622312 133
2 6347622312 133
2 63236223111133
2 6312622311 133
2 6357622312 133
2 63576223131133
2 63 7622313 133
2 63 6622313 133
2 63 7622313 133
2 63386223131133
2 6338622312 133
2 63336223121133
2 6324622312 633
2 6326622313 633
2 6325622313 633
2 6322622313 133
2 6351622312 533
2 6316622313 533
2 6319622311 133
2 6322622312 533
2 6336622313 233
2 6326622313 633
2 6334622312 533
2 6322622313 533
3 6313621813 133
3 6313621811 533
3 6314621813 533
3 6341621812 533
3 6310621813 133
3 6324621813 133
3 6337621813 233
3 63 6621812 133
3 63366218131133
3 6338621813 533
3 63 8621811 533
3 63326218121133
3 6318621811 533
3 63286218131133
3 6320621813 133
3 6314621813 533
3 6314621811 533
3 63 8621811 133
3 63186218111133
3 6326621813 533
3 6324621812 133
3 63 6621813 133
3 6323621811 133
3 63256218131133
3 6326621813 133
3 63 8621811 533
3 63 7621811 533
3 6314621811 133
3 6332621813 233
3 6330621813 533
3 6316621811 133
3 6311621811 133
2 6416302712 111
2 6414302713 111
2 6421302703 111
2 6442302703 811
2 6418302703 711
2 64 8302703 511
2 6429302713 111
2 6423302713 711
2 6412302713 111
2 6411302711 111
2 6414302701 111
2 6412302702 111
2 6422302713 111
2 6422302703 111
2 64 4302703 111
2 6412302713 111
2 6418302703 111
2 6431302703 111
2 64 1302703 111
2 6415302703 111
2 6443302712 111
2 64 1302713 111
2 64 1302713 111
2 64 1302713 111
2 6431302713 111
2 6428302702 111
2 64 9302703 111
2 6424302703 111
2 6413302713 111
2 6419302703 111
2 6440302712 111
2 64 3302711 111
2 64 9302711 111
2 6455302702 111
2 6422302703 111
2 64 33027031111
2 6414302703 111
2 6415302713 111
2 6442302713 111
2 6420302703 111
2 6437302702 111
2 6411302713 111
2 6424302703 111
2 64 1302701 111
2 64 7302701 111
2 6414302701 111
2 6421302703 111
2 6422302713 511
2 64 3302703 111
2 6422302712 711
2 6419302703 111
2 6438302702 111
2 6443302712 111
2 6443302712 111
2 6425302702 711
2 6436302712 111
2 6433302703 111
2 64 4302701 111
2 6441302713 111
2 6413302702 111
2 6438302702 111
2 6418302703 111
2 6410302713 111
2 6420302703 111
3 6411302603 111
3 6413302613 111
3 6441302612 111
3 6420302612 111
3 64 1302611 111
3 6418302613 111
3 6419302613 111
3 6450302602 111
3 64 7302603 111
3 6429302613 111
3 64 3302611 111
3 6442302602 111
3 6423302603 111
3 64 9302601 111
3 64 4302613 111
3 6417302602 111
3 64 6302611 111
3 64163026031011
3 64 4302611 511
3 6412302602 111
3 6431302613 111
3 6430302603 711
3 6419302602 111
3 6415302613 111
3 6418302613 111
3 6412302603 111
3 64 2302613 111
3 6431302612 111
3 64 3302611 111
3 6425302602 111
3 6414302613 111
3 64 8302601 111
3 6410302613 111
3 64 5302601 111
3 6413302613 111
3 6426302612 111
3 6415302613 111
3 64 4302613 111
3 6446302612 111
3 6444302602 911
3 6423302602 111
3 6438302603 111
3 6443302612 111
3 6424302611 111
3 6411302601 111
3 6437302613 111
3 64 6302603 111
3 6426302613 111
3 6446302612 111
3 6425302603 111
3 6411302611 711
3 6413302613 111
3 64433026121111
3 64 4302613 111
3 6421302613 111
3 64 5302601 111
3 6433302613 711
3 6425302602 111
3 6412302603 111
3 64 1302613 511
3 6421302613 111
3 64 5302603 111
3 6445302602 111
3 6423302603 511
3 6443302602 111
3 6442302613 111
3 64 1302601 511
1 65 5252413 111
1 6529252413 111
1 6524252413 111
1 6519252412 111
1 6534252412 111
1 6520252413 111
1 65 7252413 611
1 6516252413 111
1 6515252403 111
1 6528252413 611
1 65 3252402 111
1 6519252403 711
1 65 7252411 511
1 65 9252413 111
1 6511252413 111
1 6532252413 111
1 6532252413 111
1 6543252412 111
1 6515252411 111
1 65 1252411 111
1 6519252413 111
1 6529252412 111
1 6527252413 111
1 65 7252412 111
1 6523252402 111
1 6527252413 711
1 6514252412 111
1 65 3252403 111
1 6519252403 111
1 6530252412 111
1 6519252413 111
1 6543252412 111
1 6519252412 111
1 6535252413 811
1 6520252403 111
1 6511252402 211
1 6527252402 111
1 6521252412 111
1 6523252413 111
1 6520252412 111
1 65 3252401 111
1 6511252403 111
1 6517252413 111
1 6513252413 111
1 65 8252413 111
1 6530252413 111
1 6542252412 111
1 6510252403 111
1 6518252413 811
1 6519252413 111
1 65 6252401 111
1 65 7252411 111
1 6556252412 111
1 6523252403 811
1 6531252412 211
1 6516252413 811
1 6523252403 111
1 65 4252403 211
1 6532252412 111
1 6525252403 711
1 6510252411 711
1 6519252413 111
1 6536252412 111
1 6526252402 111
1 65 1252401 111
1 6524252413 111
1 6526252413 111
1 6525252411 111
1 6519252413 111
1 65 4252412 111
1 6519252413 111
1 6515252411 111
1 6518252413 511
1 6521252413 111
1 6527252413 111
1 6514252411 111
1 6512252413 111
1 6517252413 111
1 6518252413 111
1 6528252413 111
1 6515252402 111
1 65 2252401 111
1 65 9252403 111
1 65 5252401 111
1 6518252413 711
1 6515252413 111
1 6537252412 111
1 6519252413 111
1 65 5252403 511
1 6538252412 111
1 6517252413 111
1 6522252413 111
1 6528252411 911
1 6529252413 111
1 6522252413 111
1 6511252413 111
1 6515252403 111
3 6528392312 111
3 6528392302 111
3 6539392312 111
3 6517392313 111
3 65 9392303 111
3 6510392301 511
3 6523392313 111
3 6520392303 111
3 6536392302 111
3 6529392313 111
3 6510392303 111
3 65 2392303 111
3 65 5392301 111
3 6530392303 111
3 6527392311 911
3 6525392312 111
3 65 7392301 111
3 6545392302 111
3 6540392303 111
3 6532392303 111
3 6544392313 911
3 65 8392311 111
3 6522392303 111
3 65 7392303 111
3 6510392313 111
3 6527392313 111
3 6534392312 111
3 6517392313 511
3 6552392312 111
3 6514392303 111
3 6540392313 111
3 6511392301 111
3 65 9392301 111
3 6512392303 111
3 6535392313 111
3 6516392313 111
3 65 6392313 111
3 65 7392303 111
3 6515392311 111
3 6536392312 111
3 6517392303 111
3 65 3392301 111
3 6527392313 111
3 6517392303 111
3 6530392313 111
3 6511392311 111
3 6533392312 111
3 6553392302 111
3 6516392312 111
3 65 9392313 511
3 6522392303 111
3 6515392313 711
3 6512392313 511
3 6534392313 111
3 6521392311 511
3 65 9392313 111
3 65 9392312 111
3 6531392313 111
3 6531392302 111
3 6545392312 111
3 6519392301 511
3 6513392311 111
3 6542392312 111
3 6530392313 111
3 65 3392311 111
3 6522392303 111
3 6517392303 111
3 6526392313 111
3 6524392313 111
3 65 4392301 111
3 6536392313 111
3 6538392303 111
3 6513392303 111
3 65 7392311 111
3 6511392303 111
3 65 5392311 111
3 6546392302 111
3 6521392313 111
3 6525392303 111
3 65 3392301 111
3 6522392302 111
3 6530392313 111
3 6529392311 111
3 6521392312 111
1 6611242901 512
1 66 6242901 112
1 6612242913 112
1 6625242903 112
1 6648242912 712
1 6642242912 112
1 6651242912 112
1 6627242913 112
1 66 3242901 512
1 66 6242903 112
1 66 1242911 112
1 6624242903 512
1 66 8242911 112
1 66 7242911 112
1 66 9242903 112
1 6616242901 512
1 6617242913 112
1 6611242913 112
1 6616242913 112
1 6620242913 112
1 66 5242902 112
1 6629242913 112
1 66 1242901 112
1 6650242912 112
3 6624182913 112
3 6631182903 512
3 6640182912 112
3 66 2182903 112
3 6623182912 112
3 6619182903 112
3 6619182903 112
3 6627182903 112
3 6624182913 112
3 6648182912 112
3 66 1182901 112
3 6659182913 512
3 6666182913 112
3 6630182903 112
3 6626182912 112
3 6653182902 112
3 6632182913 512
3 6621182903 512
3 6633182903 112
3 6640182913 112
3 6634182912 112
3 66 1182901 512
3 6614182913 112
3 6655182913 712
1 6721531303 111
1 67 5531311 511
1 67 5531303 111
1 6727531303 111
1 6742531303 111
1 67 2531301 111
1 67 5531311 511
1 6711531313 111
1 6718531312 111
1 67105313031011
1 6723531302 511
1 67435313131111
1 6720531303 111
1 67 8531303 511
1 6718531311 511
1 6719531303 111
1 6730531313 511
1 67305313121011
1 67 5531303 111
1 6723531313 111
1 6722531302 511
1 67 4531303 111
1 67 8531311 111
1 67 6531313 511
1 67 1531301 511
1 67105313011011
1 67 4531313 111
1 67 1531303 111
1 6716531303 111
1 67 7531303 511
1 6716531303 111
1 6726531302 111
1 67 4531303 511
1 6713531313 511
2 67276613011111
2 6717661313 511
2 6715661313 111
2 6711661313 111
2 67 6661311 411
2 67 5661313 111
2 6716661301 211
2 6711661313 211
2 6726661302 111
2 67 2661303 511
2 6715661313 511
2 6713661303 111
2 67256613131011
2 6725661303 911
2 6723661303 111
2 6741661302 911
2 6721661312 111
2 6726661303 511
2 6723661303 111
2 6737661303 611
2 67 6661313 111
2 6724661303 511
2 6713661313 111
2 6714661301 511
2 6710661311 511
2 6714661313 511
2 67 26613021011
2 67 4661313 111
2 67 6661312 111
2 6721661312 511
1 6821422813 531
1 6832422812 131
1 6849422812 131
1 6816422812 131
1 68 3422811 131
1 68 3422811 531
1 6813422811 131
1 68244228131131
1 6860422812 631
1 6820422813 131
1 6820422813 531
1 6823422812 131
1 6810422813 131
1 6829422813 131
1 6842422812 531
1 6845422812 531
1 6811422812 131
1 6813422812 131
1 6818422813 531
1 6812422811 131
1 6820422813 531
1 6819422813 631
1 6848422812 831
1 6834422812 631
1 6821422813 531
1 6817422812 131
1 6813422811 131
1 68 8422812 131
1 6831422812 131
1 6863422812 131
1 68 1422811 131
1 6827422813 131
1 6815422813 131
1 6849422812 531
1 6816422811 531
1 68 1422811 131
1 6819422813 631
1 6823422813 531
1 6826422812 131
1 68 4422811 131
1 68 8422811 131
1 6814422811 531
1 6815422813 131
1 6824422812 131
1 6833422811 931
1 6844422812 731
1 6827422812 131
1 6816422812 531
1 6814422811 631
1 6836422812 131
1 6844422812 531
1 6826422813 131
1 68 9422813 531
1 68 4422813 531
1 6846422812 231
1 6823422813 731
1 6813422812 131
1 6824422811 531
2 68445219131031
2 68 2521911 531
2 6811521911 831
2 68 6521911 131
2 6833521912 131
2 6828521911 431
2 6811521911 531
2 68 7521911 531
2 6816521911 131
2 68 8521913 131
2 6812521913 731
2 6823521913 231
2 68 4521913 131
2 6813521913 131
2 6846521912 131
2 6818521911 731
2 6822521913 131
2 68 4521913 131
2 6816521913 131
2 6838521913 131
2 68 3521911 531
2 6828521912 131
2 6835521913 531
2 6825521912 131
2 6833521913 231
2 6820521913 531
2 6845521912 131
2 68 25219111131
2 6811521911 131
2 68 6521913 131
2 6828521913 531
2 6821521913 531
2 6841521912 131
2 68 3521913 131
2 68 6521912 131
2 68 8521913 131
2 68 5521911 231
2 6837521912 131
2 68155219131131
2 68 7521911 131
2 6812521912 131
2 6840521912 131
2 6820521913 531
2 6826521912 131
2 6812521913 131
2 6824521913 131
2 6834521913 831
2 6830521913 131
2 6828521913 731
2 6817521913 131
2 6832521913 831
2 6813521913 631
2 6836521912 931
2 68 1521911 531
3 6825521912 531
3 6822521913 131
3 68 6521913 531
3 6827521913 831
3 68305219131131
3 6828521912 131
3 6828521913 131
3 68335219131131
3 68 1521913 131
3 68 8521913 131
3 6833521913 131
3 68 5521911 131
3 6841521912 531
3 6826521913 531
3 6820521913 531
3 6814521913 131
3 6832521912 131
3 6846521912 131
3 68 4521913 131
3 6813521913 131
3 6829521913 131
3 6836521913 131
3 68 1521913 731
3 6816521913 131
3 68 4521913 131
3 6836521913 131
3 6819521913 831
3 68 6521913 131
3 6819521913 131
3 68 9521911 531
3 6844521913 831
3 68 6521913 131
3 6821521912 131
3 68355219131131
3 6828521913 131
3 6820521913 131
3 68 1521911 131
3 68 55219111131
3 6818521913 131
3 68325219111131
3 6817521913 731
3 6820521911 931
3 6818521913 131
3 6816521913 131
3 6836521911 431
3 6822521911 231
3 6844521912 731
3 6821521913 531
3 68 5521913 531
3 6827521913 131
3 6814521911 531
3 6848521912 131
3 68 8521911 531
3 6846521912 131
3 6821521913 131
3 6838521913 931
3 68 7521913 131
3 6816521913 531
3 6848521912 531
3 6829521913 131
3 6814521912 231
3 6835521912 131
3 6838521912 831
1 6933244013 133
1 6929244013 133
1 6929244013 133
1 69 1244011 133
1 69312440131133
1 6915244012 133
1 6945244012 133
1 69102440111133
1 6947244013 133
1 6940244013 133
1 6910244011 133
1 6931244012 133
1 6938244012 133
1 6918244013 133
1 69 4244012 533
1 6922244012 133
1 6925244013 133
1 6915244013 133
1 69 6244011 133
1 6938244013 133
1 6920244013 133
1 6920244011 133
1 6929244013 533
1 6936244013 133
1 6934244013 133
1 69492440121133
1 69232440111133
1 6941244012 133
1 6924244012 133
1 69 3244013 133
1 6930244013 133
1 69342440131133
1 69 1244013 133
1 6931244013 133
1 6930244012 133
1 6930244013 133
1 6928244012 133
1 6927244012 133
1 6920244013 133
1 6929244013 133
1 6920244013 533
1 6934244013 133
1 6949244012 733
1 6928244013 133
1 69392440131133
1 69 8244013 133
1 7042203013 133
1 7023203013 533
1 7031203013 133
1 7039203012 133
1 70292030131133
1 70302030131133
1 7026203013 133
1 70242030131133
1 7023203013 533
1 7021203013 133
1 7031203012 133
1 7038203013 533
1 7046203012 533
1 7025203012 133
1 7042203013 533
1 7032203013 133
1 7063203012 133
1 7046203012 133
1 70422030121133
1 7052203012 133
1 7027203011 133
3 70 72433111133
3 7032243313 133
3 7034243312 133
3 70402433131133
3 70292433131133
3 7027243313 933
3 7027243313 133
3 7057243313 133
3 7029243312 133
3 70212433131133
3 7022243313 133
3 70 8243313 133
3 70282433131133
3 7038243313 133
3 7028243313 133
3 7043243313 133
3 7039243312 133
3 7012243311 533
3 7020243313 133
3 7067243312 133
3 7042243312 533
3 70 6243311 533
3 70282433131133
3 7028243312 133
3 70322433121133
3 7033243312 133
3 7056243312 133
3 7025243313 133
3 7051243313 233
3 7067243312 133
3 70242433111133
3 70492433121133
3 7027243313 133
3 70302433131133
3 7043243312 133
3 7034243313 133
3 7038243313 133
3 70442433121133
3 7038243312 133
3 70462433131133
3 7024243313 133
1 7142312912 131
1 71293129131031
1 7121312912 131
1 71 4312913 131
1 7122312912 131
1 71 2312913 131
1 7147312912 131
1 7112312913 131
1 7111312913 131
1 71333129121131
1 7134312912 231
1 7126312912 131
1 7134312912 131
1 7117312913 531
1 7131312912 131
1 7126312913 631
1 7152312912 731
1 7123312913 731
1 71 6312913 131
1 7132312913 631
1 71 7312913 631
1 7119312912 131
1 7122312913 131
1 7122312912 131
1 7137312912 131
1 7121312912 631
1 7118312913 731
1 7134312912 831
1 71233129131131
1 7123312912 531
1 7136312912 131
1 7120312913 131
1 7123312912 531
1 71 4312911 631
1 7111312912 831
1 7121312912 131
1 7132312913 131
1 7114312913 131
1 7125312913 131
1 7112312913 531
1 7132312913 131
1 71 9312913 131
1 7112312911 631
1 7126312913 131
1 7121312913 131
1 7115312913 531
1 7136312912 131
1 71 7312913 131
1 7121312911 731
1 71 5312911 531
1 7110312913 131
1 71 2312913 131
1 71 6312913 131
1 7110312911 131
1 7126312913 131
1 7148312912 131
1 71 3312911 131
1 7147312913 731
1 7128312913 631
1 71403129121131
1 7111312913 131
1 71203129131131
1 7143312912 631
1 71 5312913 531
1 7128312912 131
1 7143312912 131
1 71 9312913 131
1 71143129121031
1 71 33129131131
3 7110452713 731
3 7131452712 231
3 71 44527111131
3 7132452713 131
3 7130452713 131
3 7124452713 131
3 71 4452713 131
3 7121452713 131
3 7111452713 131
3 7110452713 931
3 7116452713 631
3 7124452713 131
3 71164527111131
3 71374527131131
3 7131452712 631
3 71 8452711 131
3 7122452713 131
3 7114452711 631
3 7119452711 631
3 7125452713 831
3 71264527131031
3 7117452713 131
3 7116452711 131
3 7127452713 131
3 71464527131131
3 7145452712 131
3 71 5452713 131
3 7121452711 731
3 71244527131131
3 7122452713 131
3 7114452713 131
3 71334527131131
3 7113452711 531
3 7123452713 631
3 7126452713 131
3 7113452712 131
3 7123452713 631
3 7139452712 131
3 71 3452711 131
3 7112452711 531
3 7123452712 131
3 7138452713 131
3 71104527121131
3 7114452713 131
3 7113452711 131
3 71 4452711 131
3 7119452712 131
3 7120452713 431
3 7114452713 131
3 7155452712 131
3 7128452713 731
3 7124452713 131
3 7142452712 531
3 7132452712 631
3 7133452713 731
3 7120452713 131
3 7118452713 131
3 7137452712 731
3 7122452713 131
3 7130452713 631
3 7137452713 131
3 7130452712 131
3 7112452713 631
3 7141452712 631
3 71 8452711 431
3 7112452711 131
3 7120452713 131
3 71194527131131
3 71 64527111131
3 7121452713 131
3 7134452713 631
1 72 4262611 131
1 7229262613 131
1 7224262613 131
1 7223262613 131
1 7226262613 131
1 72 3262613 131
1 7218262613 131
1 7214262613 131
1 72 5262612 131
1 7223262613 131
1 7218262612 131
1 7235262613 131
1 7213262611 131
1 7224262613 131
1 7230262613 931
1 7219262613 131
1 7210262613 131
1 72 8262613 131
1 7228262612 131
1 7227262612 131
1 7229262612 131
1 7213262613 131
1 7232262612 131
1 7213262613 131
1 72 5262612 131
1 72 7262613 131
1 7215262613 831
1 7228262613 131
1 7211262613 131
1 72 6262611 731
1 7219262612 531
1 7234262613 131
1 7230262613 131
1 7234262612 731
1 7227262613 131
1 72 5262611 131
1 7224262613 131
1 7223262613 731
1 7234262613 731
1 7235262612 131
1 7218262611 131
1 7217262613 131
1 7227262613 731
1 7216262613 731
1 72 9262613 131
1 7226262613 131
1 7229262613 131
1 7243262612 131
1 7217262613 731
1 7213262613 131
1 7236262613 131
1 7212262613 131
1 7220262613 131
1 7234262612 131
1 7241262612 131
1 72 2262613 131
1 7224262613 131
1 7215262611 131
1 7226262612 131
1 7214262612 131
1 7238262612 131
1 7225262612 131
1 7225262611 731
1 7226262613 131
1 7236262612 131
1 7221262613 131
1 7234262612 131
1 72 9262611 131
1 72 9262611 131
1 72182626131131
1 7238262612 131
1 7224262613 131
2 7223362713 731
2 7227362713 131
2 72 3362713 131
2 7241362712 131
2 7215362713 131
2 7230362713 731
2 72 4362713 131
2 7216362712 131
2 7221362713 731
2 7234362712 131
2 7226362713 731
2 7211362711 831
2 7222362713 731
2 7211362713 131
2 7242362712 131
2 7255362712 731
2 7253362712 131
2 7212362711 731
2 7227362713 131
2 7241362712 131
2 7221362713 131
2 7234362712 131
2 7233362712 131
2 7239362712 131
2 72233627131031
2 7245362712 731
2 7234362713 131
2 7218362713 131
2 7220362711 531
2 7225362713 131
2 7216362713 131
2 72 3362711 131
2 7238362713 131
2 7212362711 731
2 7252362712 131
2 7221362712 131
2 7215362713 131
2 7237362712 131
2 7214362713 131
2 7232362713 131
2 7229362713 131
2 7221362711 731
2 7248362712 731
2 7221362713 131
2 7230362712 131
2 7225362713 131
2 7213362711 131
2 7228362712 131
2 72 2362713 131
2 72 8362711 731
2 7222362713 131
2 72 3362713 131
2 7221362713 531
2 7239362713 131
2 72 9362713 131
2 7229362712 131
2 7220362713 131
2 7227362713 731
2 7218362713 731
2 7234362713 531
2 7215362713 131
2 7221362712 131
2 7245362713 131
2 7214362711 731
2 7235362712 131
2 7224362712 131
2 72 3362712 131
2 7217362713 131
2 7224362713 131
2 7238362712 531
2 7232362712 131
2 7218362712 131
2 7212362711 131
2 7220362713 131
2 7212362711 131
2 7249362713 731
2 7227362713 131
2 7214362713 131
2 7222362713 131
2 7229362713 131
2 7218362713 731
2 7233362712 131
2 7236362713 131
2 72 7362711 131
2 72 3362713 131
2 7251362712 131
2 7216362713 131
2 7235362713 131
2 72 4362712 131
2 7221362713 731
2 7228362713 831
3 7239362412 131
3 7223362413 131
3 7224362411 131
3 7220362412 131
3 7212362411 131
3 7228362412 131
3 7215362411 131
3 7222362413 131
3 7226362411 131
3 7218362413 131
3 7217362413 131
3 72283624131131
3 7224362413 731
3 7253362412 131
3 7234362412 131
3 7220362413 131
3 7238362413 131
3 7238362412 131
3 72 5362413 131
3 7220362413 131
3 7211362411 531
3 7216362413 531
3 7241362412 131
3 7223362412 131
3 7226362413 131
3 7218362412 531
3 7225362413 831
3 7215362412 131
3 7210362413 131
3 7239362413 131
3 7218362413 131
3 7240362412 131
3 7223362412 131
3 7217362412 131
3 7224362413 731
3 7223362413 131
3 7238362413 131
3 7215362413 131
3 7220362413 731
3 7232362412 131
3 7250362412 731
3 7230362412 831
3 72543624131131
3 72 9362413 131
3 7217362411 131
3 72213624131131
3 7211362411 131
3 72 1362411 131
3 7227362413 131
3 7239362413 731
3 7211362411 131
3 7240362412 731
3 7224362411 731
3 7238362413 131
3 7239362412 131
3 7241362413 131
3 7232362411 131
3 7216362413 131
3 7223362413 131
3 7213362411 131
3 7227362413 131
3 7225362413 131
3 7244362413 831
3 7217362413 131
3 7213362413 131
3 7212362411 131
3 7235362412 731
3 7216362411 131
3 7225362413 131
3 7222362413 131
3 7231362413 731
3 7218362413 131
3 72 8362413 131
3 7254362412 831
3 7220362413 131
3 7247362412 731
3 7228362413 131
3 7218362413 131
3 7225362413 131
3 7225362411 731
3 7219362413 831
3 7238362412 131
3 7216362411 731
3 7233362412 131
3 7221362413 731
3 7244362412 131
1 7318192513 531
1 7339192513 531
1 73 4192511 131
1 7336192512 131
1 7326192513 131
1 7332192513 531
1 73261925131031
1 7331192512 131
1 7327192513 131
1 7316192513 131
1 7311192513 131
1 7327192511 531
1 7336192512 131
1 7320192512 131
1 7314192513 531
1 7315192513 131
1 7324192512 131
1 7312192513 131
1 73 21925111131
1 73181925111031
1 7314192511 131
1 7339192512 131
1 7317192511 131
1 7329192513 131
1 7316192513 131
1 7311192513 831
1 7310192513 131
1 7312192513 131
1 7319192513 131
1 73 4192511 831
1 7336192513 131
1 7341192512 131
1 7310192511 131
3 7329233013 131
3 7313233011 131
3 7325233012 131
3 7318233011 131
3 7311233013 131
3 7318233011 731
3 7348233012 131
3 7354233012 231
3 7347233012 131
3 7326233013 131
3 7328233012 131
3 7341233012 131
3 73 3233011 131
3 73232330131131
3 7336233013 131
3 7315233013 531
3 73232330131031
3 7311233013 531
3 7323233013 131
3 7338233012 131
3 7319233013 131
3 7322233013 131
3 73212330131031
3 7322233013 131
3 7324233013 131
3 7316233012 131
3 7337233012 131
3 7326233013 131
3 7346233012 131
3 7317233013 131
3 73 5233013 131
3 7323233013 531
3 7337233012 131
3 7310233011 131
3 7320233011 131
3 7326233013 131
3 7317233011 131
3 7335233012 131
3 7341233012 131
3 7327233013 131
3 7326233013 531
3 73122330111031
3 7318233013 131
3 7344233012 531
3 7344233012 131
3 7313233013 131
3 7331233013 131
3 7362233012 131
1 74195814121111
1 7421581412 111
1 74 4581402 111
1 74 7581411 611
1 7438581403 211
1 7428581413 611
1 74 3581403 611
1 7424581413 511
1 7412581413 511
1 7410581401 411
1 74 5581411 111
1 74 4581411 111
1 7427581402 211
1 7428581413 811
1 74 3581401 111
1 7430581411 511
1 74 1581401 211
1 7422581412 111
1 7411581402 111
1 74 6581402 111
1 7416581413 511
1 74 25814011011
1 7417581412 511
1 74 5581401 511
1 74 9581411 511
1 7425581402 111
1 7417581413 111
1 74 1581403 511
1 7428581412 811
1 7424581403 111
1 7420581413 111
1 7422581413 111
1 7430581402 111
1 7418581413 911
1 7413581403 211
1 7417581413 511
1 7412581401 711
1 7414581401 611
1 7413581403 511
1 7418581403 611
1 7424581413 211
1 74 7581401 111
1 7415581403 111
1 74 1581411 511
1 7415581413 511
1 74 95814131011
1 74 7581411 111
1 7422581403 111
1 7411581403 511
1 74115814111011
1 74 4581403 511
1 7425581413 511
1 74 1581403 611
1 7415581403 511
1 7419581401 611
1 74 6581401 511
1 7413581403 211
3 74 8561203 211
3 74 9561203 211
3 74 1561213 611
3 74 1561203 611
3 7421561203 311
3 7413561213 111
3 74 95612031011
3 74 2561211 511
3 74 6561201 411
3 7426561202 111
3 7430561201 211
3 74 8561203 411
3 74185612031111
3 7422561211 211
3 74 4561213 111
3 7452561202 111
3 7415561203 911
3 74 6561203 411
3 7450561212 511
3 7423561201 611
3 7414561213 511
3 7420561203 711
3 7410561211 711
3 74 6561201 511
3 74 4561201 111
3 7441561213 111
3 7422561211 511
3 74 3561201 111
3 74 8561201 111
3 74 7561211 611
3 74 25612011011
3 7412561213 111
3 7418561202 511
3 7449561203 911
3 7415561202 611
3 74205612131111
3 7414561213 511
3 7431561213 111
3 7411561213 911
3 74 1561213 211
3 7417561203 611
3 7430561203 111
3 7413561211 511
3 74 2561201 111
3 7421561201 211
3 7456561203 811
3 7415561203 311
3 74 3561213 411
3 74 1561203 411
3 74 4561201 111
3 7425561203 611
3 74 6561211 111
3 7424561212 511
3 7410561211 411
3 7410561213 211
3 7425561203 111
3 7412561201 611
3 74 2561203 411
3 7417561211 511
3 75134318131031
3 7526431813 131
3 7543431813 131
3 7513431812 131
3 7523431813 931
3 7511431813 131
3 7538431813 631
3 7531431813 531
3 75124318111031
3 75194318111031
3 7545431813 131
3 75 7431813 131
3 7539431812 631
3 7533431813 631
3 7515431811 131
3 7537431812 131
3 7521431813 131
3 7528431813 131
3 7532431812 131
3 75244318111031
3 7513431813 831
3 7545431812 131
3 7533431813 531
3 75 9431811 131
3 7543431813 531
3 7528431813 631
3 7531431813 131
3 7523431813 731
3 75454318131131
3 75 9431813 131
3 7628551513 631
3 76 3551513 131
3 7625551511 531
3 7615551513 131
3 7614551512 131
3 76 6551513 131
3 76 3551513 531
3 7610551513 531
3 7624551513 131
3 7615551511 131
3 76 7551513 531
3 7620551511 531
3 7617551513 131
3 7633551513 831
3 7616551512 531
3 7616551511 531
3 7614551512 131
3 7610551513 331
3 7614551513 531
3 76 8551511 531
3 76 6551511 531
3 7612551513 131
1 77 7372213 113
1 7720372203 113
1 7723372213 113
1 7720372203 113
1 7720372213 113
1 7742372212 713
1 7739372212 113
1 77 13722011113
1 77253722131113
1 77203722131113
1 7714372211 113
1 77303722021113
1 7711372212 113
1 7739372212 113
1 77 4372213 113
1 77 6372203 113
1 77193722031113
1 7732372213 113
1 77133722011113
1 77 8372203 513
1 7744372213 113
1 7726372212 113
1 77413722121113
1 77 83722131113
1 7737372212 113
1 7718372203 213
1 7711372213 113
1 7712372203 113
1 7713372203 113
1 77 1372203 113
1 7742372212 113
1 77283722121113
1 7713372213 113
1 7737372213 713
1 7734372212 113
1 7733372213 113
1 7715372203 513
1 7721372203 113
2 7713512502 113
2 77 7512503 113
2 7729512502 513
2 77 95125011113
2 7718512511 513
2 77 6512501 213
2 7731512513 113
2 7710512503 113
2 77225125021113
2 7716512512 113
2 7725512502 113
2 7736512512 113
2 77 6512503 113
2 7719512503 513
2 77 9512503 513
2 7726512513 113
2 77485125121113
2 7727512502 513
2 7713512501 113
2 7735512513 513
2 7713512513 213
2 7711512511 513
2 7722512511 113
2 7715512502 113
2 7731512513 113
2 7728512513 113
2 7720512503 113
2 7729512503 513
2 7712512503 113
2 7734512503 113
2 7718512502 113
2 7732512502 113
2 77 9512503 113
2 7724512503 113
2 7711512501 113
2 7721512512 113
2 7721512502 113
2 7730512502 113
3 77 4512211 513
3 7714512213 113
3 77105122011113
3 7720512202 113
3 7710512213 113
3 7723512213 213
3 7730512213 113
3 7721512213 113
3 77 5512201 113
3 7736512202 113
3 77 6512203 113
3 77365122021113
3 7718512211 513
3 7712512213 113
3 77315122131113
3 7723512202 113
3 7725512202 513
3 7732512202 513
3 7753512202 113
3 77 2512211 113
3 77475122121113
3 7738512202 113
3 7722512202 113
3 77235122131113
3 7730512203 913
3 7729512213 513
3 7712512201 113
3 7716512213 513
3 77 9512203 113
3 77295122131113
3 7738512202 113
3 77195122031113
3 7721512213 113
2 78 2462002 123
2 78 1462001 123
2 7810462003 123
2 7814462002 523
2 78 6462003 123
2 78 2462003 123
2 7814462003 523
2 78144620031123
2 78114620011123
2 78 7462001 123
2 7815462002 123
2 78 6462002 523
2 78374620021123
2 7820462003 123
2 78 4462003 123
2 78 54620031123
2 78 1462001 123
2 78 84620031123
2 7813462002 123
2 78 7462002 123
2 7813462003 123
2 7815462002 123
2 7813462003 523
3 78 3462203 123
3 78 9462201 123
3 78 2462203 123
3 78 2462201 123
3 7818462202 123
3 7829462203 123
3 7827462202 123
3 7844462202 123
3 7845462202 123
3 78 2462203 123
3 78 6462203 123
3 7824462202 123
3 78 7462201 123
3 78134622031123
3 7826462203 523
3 7837462202 123
3 7816462203 623
3 78504622021123
3 7813462201 523
3 7829462203 123
3 78204622031123
3 7815462203 523
3 7816462203 523
3 7818462203 123
3 78 3462203 123
3 7832462203 123
3 78 9462203 123
3 78 4462203 523
3 7825462202 123
3 7810462203 123
3 78 6462201 123
3 7827462203 123
3 7819462203 123
3 7840462202 123
2 7929501913 313
2 7928501913 913
2 7910501902 513
2 7937501903 913
2 79 5501913 113
2 79185019031113
2 7911501901 513
2 79 6501911 113
2 79 1501913 113
2 7933501913 113
2 79 1501903 113
2 79 8501903 113
2 7940501912 513
2 7937501912 113
2 7923501913 513
2 79175019131113
2 7912501913 113
2 7928501913 913
2 7926501903 113
2 7919501903 213
2 79 8501911 113
2 7924501913 513
2 79 8501913 113
2 79305019031113
2 79 45019131113
2 79 5501913 113
2 7936501913 113
2 79 3501913 113
2 7918501903 113
2 79 8501913 113
2 7923501913 113
2 7920501912 113
2 7943501913 113
2 7915501903 113
2 79225019131113
2 79 2501913 113
2 79 5501901 113
2 7932501902 513
2 7926501901 113
2 7926501902 513
2 7928501903 513
2 7934501913 113
2 7940501912 113
3 79 4501313 113
3 7918501303 113
3 7916501313 113
3 7940501313 513
3 7914501313 113
3 79 3501301 113
3 7914501313 113
3 7922501311 113
3 7938501303 113
3 7920501312 113
3 79255013111113
3 7935501313 513
3 7929501311 513
3 79 1501303 113
3 7924501311 513
3 7910501313 113
3 7911501301 113
3 79345013121113
3 7914501312 113
3 79175013031113
3 79 7501313 513
3 7922501303 113
3 79 5501311 513
3 7919501313 113
3 79155013031113
3 79 5501311 113
3 79 1501303 113
3 7920501313 113
3 79 6501311 113
3 79 95013031113
3 7937501303 113
1 8025292201 113
1 80412922131113
1 80 8292203 113
1 8021292202 113
1 80 3292211 113
1 8018292203 113
1 8019292212 113
1 8018292203 113
1 8016292201 513
1 8011292211 113
1 8019292211 113
1 8015292213 113
1 8015292202 113
1 8031292202 113
1 8036292203 113
1 8019292203 113
1 8016292202 113
1 8021292212 113
1 8015292211 113
1 8025292202 113
1 8021292213 113
1 80 7292202 113
1 80 7292203 113
1 80482922121113
1 8013292203 113
1 80 8292201 513
1 8028292213 113
1 8024292212 113
1 80 2292211 513
1 8026292212 113
2 80 7451311 513
2 8028451302 113
2 8028451302 113
2 80204513131113
2 80414513021113
2 8011451303 113
2 80 1451303 113
2 8023451303 113
2 8013451303 113
2 8013451313 113
2 8015451301 113
2 80144513111113
2 80 2451303 113
2 80314513111113
2 8015451301 113
2 80 4451303 113
2 8013451311 513
2 8017451311 113
2 8026451312 113
2 8011451303 113
2 8013451313 113
2 8011451303 113
3 8027451312 113
3 8016451303 513
3 80 1451301 113
3 8015451303 113
3 8029451302 113
3 8032451302 513
3 8031451313 913
3 80 7451313 113
3 8027451303 113
3 8022451303 113
3 8022451303 113
3 8018451312 513
3 80 74513011113
3 80 7451313 113
3 80 4451312 113
3 8016451301 113
3 80184513111113
3 80 8451303 513
3 80 1451311 113
3 8018451303 513
3 80274513131113
3 8023451303 513
3 8010451303 113
3 80 7451311 113
3 8013451311 113
3 8032451302 113
3 8016451311 513
3 8015451303 113
3 8018451303 513
1 8129282313 512
1 8123282313 112
1 8147282302 112
1 8139282312 112
1 8127282313 512
1 81 9282311 512
1 8120282312 112
1 81402823121112
1 8128282302 112
1 8113282312 512
1 81 8282303 112
1 8135282302 912
1 8139282302 112
1 8125282313 112
1 8118282301 512
1 8131282303 112
1 8118282303 512
1 8112282303 512
1 8121282313 112
1 8124282312 112
1 8135282313 912
1 8110282301 212
1 8122282313 112
1 8124282302 112
1 8116282313 112
1 8115282313 112
1 8133282302 112
1 81 72823011112
1 8111282313 112
1 81 8282311 512
1 8116282303 112
1 81 1282301 112
1 8111282303 612
1 81 9282301 512
1 8126282313 512
1 8161282302 112
1 81372823031112
1 8115282303 112
1 8125282303 112
1 81 8282311 512
1 8124282313 112
1 8144282303 112
1 8111282303 112
1 81 9282303 112
1 81 2282301 112
1 8121282313 112
1 8145282312 612
1 8112282311 512
1 81 4282301 512
1 8110282313 112
1 8123282303 112
1 8122282312 512
1 8122282312 112
1 8114282311 512
2 81 5493113 112
2 8114493112 112
2 8113493113 112
2 8118493103 112
2 81 6493103 112
2 8122493103 512
2 8149493112 112
2 8117493103 112
2 81174931031112
2 81 8493103 512
2 8127493103 112
2 8110493113 212
2 81 8493113 112
2 8120493103 512
2 81 9493101 112
2 8119493113 112
2 8114493113 112
2 81 5493101 512
2 81294931131112
2 81 6493101 512
2 8138493103 112
2 8144493112 112
2 8135493113 112
2 8115493102 112
2 8152493102 112
2 8126493113 112
2 8139493112 112
2 8124493103 612
2 81 8493102 512
2 8118493103 212
2 8121493113 112
2 8113493101 512
2 8136493103 112
2 81 7493101 512
2 8135493112 112
2 8131493112 112
2 8114493113 112
2 8132493112 512
2 8112493103 512
2 8116493113 112
3 8113492213 112
3 8110492203 112
3 81 1492201 112
3 8112492203 112
3 81134922131112
3 8125492212 112
3 8110492203 512
3 8128492213 112
3 81 6492201 112
3 8117492213 512
3 8130492212 512
3 8110492203 112
3 8123492202 112
3 8115492202 112
3 8111492213 112
3 8119492202 112
3 8126492202 112
3 8127492203 512
3 8110492203 112
3 8122492213 112
3 8114492211 512
3 81 5492211 512
3 8120492212 512
3 8122492213 512
3 81 2492211 112
3 8113492203 112
3 8129492212 512
3 8121492213 112
3 8110492203 112
3 8140492202 112
3 8117492203 112
3 81 4492201 112
3 8113492202 512
3 8114492203 112
3 81 4492213 112
3 8116492213 112
3 8118492201 212
3 8121492213 112
3 8121492202 112
3 8115492203 112
3 8121492203 512
3 81 1492203 112
3 81 1492201 512
3 8126492212 112
3 81 3492201 112
3 8114492213 512
3 8120492203 112
3 8113492202 112
3 8115492211 512
3 8112492203 512
3 8122492203 512
3 8120492213 112
3 8127492213 112
3 8129492202 112
3 8124492213 112
3 81 6492211 112
1 8245242112 132
1 8220242113 132
1 8240242113 532
1 8236242113 132
1 82 4242111 532
1 82 72421131132
1 8221242113 132
1 82 9242113 532
1 82 6242111 532
1 8237242113 932
1 82242421131132
1 8244242112 132
1 8211242113 532
1 8222242113 132
1 8248242112 132
1 8218242111 132
1 8229242113 532
1 82112421111132
1 8211242113 132
1 8220242113 132
1 8225242113 532
1 8210242113 232
1 8213242111 532
1 8249242112 632
1 82112421111132
1 82 8242113 532
1 8241242112 132
1 8216242113 132
1 8221242113 132
1 8217242113 732
1 8253242113 932
1 8221242112 132
1 8233242113 532
1 82 7242113 132
1 8232242112 132
1 8216242113 532
1 8217242113 132
1 8242242112 532
1 82 4242111 332
2 8226441513 232
2 82 4441511 132
2 8219441513 132
2 8212441511 532
2 82 8441511 132
2 8225441513 532
2 8241441512 532
2 8232441512 132
2 8233441513 232
2 82 3441513 132
2 8218441511 532
2 8232441513 232
2 8222441513 132
2 8232441512 132
2 8210441513 532
2 82 3441511 832
2 8219441512 132
2 8222441513 532
2 8212441513 532
2 82 4441511 132
2 8229441512 532
2 8213441513 532
2 82 5441511 532
2 8257441513 132
2 82 6441513 232
2 8232441513 132
2 8221441513 532
2 8236441513 532
2 8237441512 132
2 82 7441511 532
2 82 4441513 532
2 8230441513 532
2 8216441511 132
2 8235441513 532
2 8237441513 532
2 8210441513 532
2 8225441513 132
2 82 9441511 532
3 8244442012 232
3 8215442013 532
3 8220442013 132
3 8228442012 532
3 8235442012 132
3 8220442013 532
3 8227442013 232
3 8239442013 632
3 8225442012 532
3 8234442013 132
3 8223442013 132
3 8241442013 232
3 8218442013 532
3 82 5442011 532
3 8236442012 132
3 8216442013 532
3 8226442012 132
3 82 8442011 532
3 8224442012 132
3 8226442012 132
3 8210442013 532
3 8222442011 532
3 8220442013 532
3 82 9442011 532
3 8219442013 132
3 8211442011 132
3 8222442011 132
3 8215442011 132
3 8244442012 532
3 8224442011 232
1 8325232813 132
1 83 2232813 132
1 8314232813 132
1 8331232813 332
1 8317232813 132
1 8322232813 332
1 83 9232811 132
1 8330232813 132
1 83502328121132
1 83412328121132
1 8310232813 132
1 8324232812 532
1 8321232813 132
1 8343232812 132
1 8319232813 532
1 8316232813 132
1 8347232812 732
1 8322232812 132
1 8345232812 232
1 8321232813 732
1 8337232813 132
1 83 6232813 132
1 8324232813 132
1 8315232813 132
1 83 3232813 132
1 83142328111132
1 8311232813 532
1 8319232813 532
1 8319232813 132
1 83 7232813 132
1 8327232813 532
1 8354232812 132
1 8318232813 132
1 8331232812 132
1 83 2232811 132
2 8345212312 832
2 8326212313 132
2 8335212313 532
2 8360212313 332
2 8333212313 532
2 83 6212313 132
2 8314212313 132
2 8327212312 132
2 8321212311 732
2 8334212313 132
2 83592123121132
2 8333212312 132
2 83372123121132
2 8316212311 532
2 8338212312 132
2 8352212312 132
2 8310212313 132
2 83 9212313 132
2 8355212312 232
2 8323212313 632
2 83 2212313 532
2 8328212313 132
2 8335212313 732
2 8340212313 732
2 8310212311 532
1 84 4233403 113
1 84202334121113
1 8425233402 113
1 84 9233413 113
1 8417233403 113
1 8434233412 113
1 84 9233413 113
1 8414233403 113
1 8421233403 113
1 8417233413 113
1 8432233403 113
1 8426233412 113
1 8435233412 113
1 84332334021113
1 84 92334131113
1 8425233412 113
1 8422233403 113
1 84 1233402 113
1 84222334031113
1 84 1233402 113
1 8412233413 113
1 84212334131113
1 8434233402 113
1 8420233402 113
1 8422233413 113
1 84 8233401 113
1 84 2233403 113
1 8429233403 113
1 8429233401 113
1 8429233403 113
1 8422233411 113
1 8425233413 113
1 8432233413 113
1 8417233402 113
1 8425233402 113
1 8438233412 113
1 8434233402 113
1 8417233403 113
1 8421233403 113
1 84 1233403 113
1 8457233402 913
1 84242334031113
1 8425233412 113
2 8420413213 113
2 8420413212 113
2 8435413203 113
2 84 9413201 113
2 8439413202 113
2 8416413201 113
2 8418413213 513
2 8410413212 113
2 8425413202 113
2 8417413213 113
2 84204132131113
2 8414413212 113
2 8422413213 113
2 8412413211 113
2 8417413213 113
2 8431413213 113
2 8428413213 113
2 84224132131113
2 8412413202 113
2 8442413203 513
2 84 9413212 113
2 8416413213 113
2 8436413213 113
2 8417413203 113
2 8419413213 113
2 84174132031113
2 8424413213 113
2 84 7413203 113
2 8425413202 113
2 84204132131113
2 8419413213 113
2 84 6413213 113
2 8415413212 113
2 8430413203 113
2 8438413212 113
2 8418413203 513
2 8436413203 113
2 8426413202 113
2 8416413212 113
2 84 2413203 113
2 85 3263911 513
2 8513263911 113
2 8527263913 113
2 8524263903 713
2 8526263902 113
2 8534263902 113
2 8519263902 113
2 85322639131113
2 8510263902 113
2 85 5263903 113
2 8516263901 113
2 8520263901 113
2 8532263903 113
2 8536263902 113
2 8528263902 913
2 8524263902 113
2 8526263913 113
2 8537263913 113
2 8530263903 113
2 8518263901 113
2 8533263912 113
2 8539263903 113
2 8525263912 113
2 8517263913 213
2 8518263901 113
2 8537263903 713
2 85132639031113
2 85 4263901 113
2 8530263912 113
2 8529263912 113
2 8520263903 113
2 8516263903 113
2 8544263912 113
2 8520263913 113
2 8526263913 113
2 8543263912 113
2 8529263913 113
2 8534263902 113
2 8517263901 713
2 8526263913 113
2 8525263912 113
2 8520263912 113
2 85 3263901 213
2 8512263912 113
2 8520263913 113
3 8513262202 113
3 8537262213 113
3 8515262203 113
3 8537262212 113
3 8520262212 113
3 8515262202 113
3 8530262202 113
3 8531262212 113
3 8535262202 513
3 8529262213 113
3 8519262213 113
3 8527262203 113
3 8520262203 113
3 8516262203 113
3 8532262212 113
3 8529262202 113
3 8528262203 113
3 8527262203 113
3 8529262202 113
3 8519262213 113
3 8527262202 113
3 8531262212 113
3 8524262213 113
3 8522262213 113
3 8522262211 913
3 8514262213 113
3 8515262213 113
3 8542262212 113
3 8529262213 113
3 8524262213 113
3 8514262213 113
3 8518262213 113
3 8528262212 113
3 8513262203 113
3 8523262213 113
3 85 9262213 913
3 8523262213 113
3 8526262213 113
3 8515262211 513
3 8526262203 113
3 8522262213 113
3 8510262213 113
3 8510262202 513
3 8534262213 113
3 8530262213 113
3 8520262211 113
3 8515262203 113
1 863357 813 111
1 861857 801 411
1 86 457 803 111
1 86 757 813 111
1 861257 8031111
1 86 557 803 111
1 86 457 813 111
1 86 357 813 111
1 86 157 803 111
1 861157 813 111
1 86 757 813 111
1 863257 813 111
1 863357 812 111
1 86 957 813 111
1 86 157 803 111
1 86 557 813 111
1 861757 813 111
1 861957 813 111
1 86 857 803 511
1 86 257 811 111
1 861557 8131111
1 861557 811 111
1 861457 813 111
1 86 657 811 111
1 86 157 801 111
1 862057 813 111
1 863057 803 211
1 861657 803 111
1 86 757 803 111
1 861257 803 511
1 861057 803 511
1 863057 803 511
1 861657 813 111
1 862057 813 111
1 86 957 803 111
1 86 957 811 111
1 864257 803 111
1 86 757 801 111
1 86 557 811 511
2 86 790 403 111
2 861490 403 411
2 862190 413 111
2 861990 412 511
2 863790 412 511
2 862790 411 111
2 861190 401 111
2 86 190 401 111
2 86 590 403 111
2 861790 411 111
2 862190 403 111
2 86 190 403 111
2 863790 403 411
2 861790 413 111
2 862590 413 511
2 861690 413 511
2 862090 403 111
2 861390 413 211
2 86 790 401 711
2 861490 412 111
2 86 290 401 111
2 861890 413 111
2 863090 413 811
2 86 190 403 111
2 861990 413 111
2 861590 401 411
2 862290 403 111
2 861590 401 511
3 861190 500 211
3 86 290 5001011
3 86 290 502 811
3 861790 502 511
3 864490 502 111
3 86 690 5001011
3 861490 511 511
3 86 190 511 111
3 86 790 513 111
3 86 290 500 411
3 86 690 500 411
3 862090 500 411
3 86 390 500 111
3 86 490 502 111
3 863290 502 511
3 861490 502 411
3 86 490 502 111
3 86 890 502 511
3 86 890 502 111
3 863790 502 911
3 86 690 513 511
3 861290 502 111
3 861990 513 111
3 862390 513 111
3 861590 500 111
3 862590 512 111
3 86 390 5021111
3 86 290 500 411
3 86 290 502 511
3 865290 502 411
3 861890 500 111
3 86 190 502 111
3 86 290 513 111
1 8714302313 113
1 87293023031113
1 87 1302301 113
1 87 5302301 113
1 87113023031113
1 8716302313 213
1 8739302302 113
1 8712302313 113
1 8717302303 113
1 87 8302303 113
1 87 6302301 113
1 87 5302313 113
1 87213023031113
1 87 9302303 113
1 8731302312 113
1 8725302313 113
1 8711302312 113
1 8746302302 113
1 8722302313 113
1 8715302313 113
1 8718302312 113
1 87263023011113
1 87 1302303 113
1 8739302312 913
1 8715302301 113
1 8720302302 113
1 87223023031113
1 87423023031113
1 87153023031113
1 8710302303 113
1 8734302312 113
1 87143023031113
1 87153023131113
1 87 3302301 113
1 87 4302301 113
1 8755302312 113
1 87123023031113
1 8710302313 513
1 8712302303 113
1 87173023031113
1 8713302303 113
1 8724302313 113
1 87 6302303 113
2 8740551802 113
2 8720551811 113
2 87185518131113
2 87 7551803 113
2 87 5551801 113
2 8745551812 113
2 87 9551803 113
2 8726551812 113
2 8718551803 513
2 87195518031113
2 87 8551801 113
2 8725551802 113
2 87425518021113
2 87 3551803 113
2 87 1551803 113
2 8721551802 113
2 87305518011113
2 8710551803 513
2 87 9551811 113
2 87325518031113
2 87 4551811 113
2 8727551812 113
2 8712551803 513
2 87 2551801 113
2 8710551802 113
2 87105518031113
2 87285518131113
2 87265518021113
2 8713551803 113
2 87 9551803 113
2 8710551803 113
2 87115518131113
2 87145518011113
3 8724553113 113
3 8729553113 113
3 87 9553103 113
3 8717553113 113
3 8710553112 113
3 8711553103 113
3 8728553112 113
3 8716553102 113
3 8717553103 113
3 87 7553113 113
3 87 3553103 113
3 87 6553101 113
3 8713553113 613
3 87 3553101 113
3 8712553101 113
3 87 4553103 113
3 8737553102 113
3 87 2553101 513
3 8714553113 513
3 8710553101 113
3 8726553112 113
3 8712553102 113
3 87135531131113
3 8712553103 113
3 8718553103 113
3 87175531031113
3 87 3553103 113
3 8718553102 113
3 8711553103 113
3 8736553112 113
3 87 35531011113
3 87 5553103 113
3 8716553102 813
3 8712553111 113
3 8727553102 113
3 8750553102 213
3 8718553103 913
3 87245531131113
3 87 5553103 113
3 8737553113 113
1 8810392713 532
1 8815392711 132
1 8816392712 132
1 8812392711 132
1 8841392713 532
1 8824392712 132
1 8822392712 132
1 88 1392713 132
1 8819392711 532
1 8822392713 132
1 8810392713 132
1 8850392712 132
1 88 6392713 132
1 8826392712 132
1 8835392712 832
1 8814392711 132
1 8828392713 132
1 8841392712 132
1 8823392713 232
1 8844392712 532
1 8822392713 132
1 8819392711 132
1 88 4392711 532
1 88 7392713 132
1 8821392713 232
1 8823392713 132
1 88 7392711 232
1 8824392713 132
1 8830392712 132
1 8814392711 632
1 88 93927111032
1 8815392713 132
1 88 5392711 132
1 8850392712 932
2 8825382312 132
2 8825382313 532
2 8828382313 132
2 8830382312 132
2 8820382313 132
2 88 5382313 132
2 88 1382313 132
2 8841382312 132
2 8848382312 132
2 8846382312 132
2 8812382313 132
2 88 3382313 132
2 88 7382313 132
2 8829382313 532
2 8821382312 532
2 8841382313 132
2 8849382312 532
2 88 2382311 232
2 88 5382313 532
2 8828382312 132
2 8812382313 132
2 88 3382311 132
2 8840382312 132
2 8814382313 132
2 8815382313 132
2 8833382313 132
2 88323823131132
2 88 1382311 132
2 8811382313 132
3 88 8382113 232
3 88 6382111 132
3 88 3382113 532
3 8860382112 232
3 8830382113 132
3 88 1382111 232
3 8827382111 132
3 88 6382111 132
3 8819382113 532
3 8833382113 132
3 8842382112 132
3 8814382113 532
3 8812382111 132
3 88 2382113 132
3 8859382112 132
3 88 7382111 132
3 88 6382113 132
3 8818382113 132
3 8827382113 132
3 8829382113 132
3 8853382112 632
3 8814382111 532
3 8810382111 132
3 8836382112 132
3 8842382113 132
3 8827382112 132
3 8819382113 532
3 8833382113 532
3 8817382112 232
3 8812382113 132
3 88163821131132
3 8818382113 132
3 8815382113 132
1 89172927131133
1 8919292712 133
1 8929292712 533
1 8924292713 133
1 8925292713 533
1 8913292713 533
1 8913292711 133
1 89 8292713 133
1 8912292713 133
1 8910292713 133
1 89252927121133
1 8910292713 533
1 8921292711 133
1 89 2292711 133
1 8931292712 133
1 8922292713 133
1 8916292713 133
1 8941292712 533
1 8911292711 133
1 8917292713 133
1 8933292712 133
1 8927292712 533
1 8912292711 533
1 8910292711 533
1 89 8292713 133
1 8920292712 933
1 8925292712 133
1 89 8292713 133
1 8925292712 133
1 8913292713 533
1 8923292713 133
1 89 8292711 233
1 89 3292711 133
1 89242927131133
1 8919292713 133
1 8911292713 133
1 8921292713 133
1 8947292712 133
1 8917292712 133
1 8932292713 133
1 8921292713 133
1 8913292711 133
1 8911292713 133
1 89 6292711 133
1 89292927131133
1 89 5292713 533
1 89 6292713 933
1 8935292712 133
1 8925292713 133
1 8942292712 533
2 8927322113 933
2 89 9322111 133
2 89 6322113 133
2 8910322113 133
2 8914322113 133
2 89193221121133
2 8932322112 533
2 8924322112 133
2 8925322113 533
2 8929322113 133
2 8945322112 133
2 8925322112 133
2 89213221131033
2 8922322113 533
2 8916322113 533
2 8912322113 133
2 8914322113 533
2 89153221111133
2 8910322111 133
2 8920322113 133
2 8911322111 133
2 89163221131133
2 8931322113 733
2 8925322112 533
2 8926322113 133
2 8935322112 133
2 8922322113 133
2 8926322113 133
2 8926322111 133
2 8938322113 533
2 8926322112 133
2 8926322113 133
2 8920322111 533
2 89133221111133
2 8918322113 133
2 8924322113 533
2 8915322113 133
2 8913322113 133
2 8926322111 133
3 8936322713 133
3 8939322712 133
3 8925322713 133
3 89443227121133
3 8923322711 133
3 8932322713 533
3 8921322713 133
3 8919322713 133
3 8951322712 133
3 8914322713 533
3 8924322712 133
3 8910322713 533
3 8928322712 533
3 8913322712 533
3 8944322712 133
3 89 4322713 533
3 8933322713 133
3 8944322712 933
3 8912322713 533
3 89 5322711 533
3 89133227111133
3 8946322713 133
3 8929322713 533
3 8923322713 233
3 8919322713 533
3 8929322712 533
3 8926322713 133
3 8942322712 133
3 8920322713 133
3 8925322713 133
3 8940322712 533
3 8938322712 133
3 8917322713 133
3 8945322712 533
3 8926322713 533
3 8926322712 133
3 8947322713 133
3 8916322713 533
3 8922322713 133
3 8949322713 133
3 8939322712 933
3 9026442413 113
3 9020442411 113
3 90204424031113
3 9019442413 113
3 9014442403 113
3 9045442412 113
3 90 94424031113
3 9039442413 113
3 9033442413 113
3 9044442403 213
3 9014442413 213
3 9042442412 113
3 9019442413 113
3 9038442413 113
3 9026442403 113
3 90444424121113
3 90154424131113
3 9028442411 213
3 9019442413 113
3 90364424131113
3 9014442413 113
3 9015442402 113
3 9015442413 113
3 90354424131113
3 9016442401 113
3 9014442412 113
3 90284424131113
3 9019442413 113
3 90344424031113
3 90134424131113
3 90504424121113
3 9013442413 113
3 9030442412 113
3 90 5442403 113
3 9033442412 113
3 9011442403 213
3 90104424031113
3 9016442401 113
3 9047442412 113
3 90194424131113
3 9035442412 113
3 90244424111113
3 9046442412 113
3 90284424131113
3 90 5442413 113
3 9037442412 113
3 9025442413 113
1 9121111703 113
1 9126111713 113
1 9137111712 113
1 9121111713 113
1 9127111712 113
1 9132111713 113
1 9116111703 113
1 9129111711 113
1 9137111712 113
1 91 5111713 113
1 9118111713 113
1 9125111712 113
1 9117111701 113
1 9138111713 113
1 9117111703 113
1 91 4111713 113
1 9126111713 113
1 9127111713 113
1 9119111712 113
1 9130111702 113
1 91 5111713 113
2 9137 83811 113
2 9135 83813 113
2 9119 838131113
2 9139 83802 113
2 9144 83811 513
2 9141 83811 113
2 9128 83812 113
2 9119 83803 113
2 9118 83803 113
2 9151 83813 113
2 9138 83801 113
2 9141 83802 113
2 9122 83812 113
2 9137 83812 113
2 9143 83812 113
2 9116 83801 113
2 9130 83803 113
2 9138 83812 113
2 9131 83803 113
2 9122 83803 113
2 9124 83813 113
2 9129 83812 113
2 9131 83803 113
2 9139 83812 113
2 9126 83803 113
2 9119 838031113
2 9132 83803 113
2 91 7 83811 113
2 9160 83812 113
2 9135 83813 113
2 9119 838031113
2 9148 83812 113
2 9135 838131113
2 9137 83802 113
2 9123 838121113
2 9132 83813 113
2 9133 83813 113
2 9141 83813 113
2 9128 83813 713
1 92423631031123
1 92 23631021123
1 9250363102 123
1 9248363102 123
1 9222363102 223
1 92 5363103 123
1 9216363103 223
1 9226363103 123
1 9219363102 223
1 92 4363101 223
1 9219363103 223
1 9249363102 523
1 92 8363101 123
1 92103631031123
1 92 7363103 123
1 92 1363103 123
1 92 8363101 923
1 9221363103 523
1 9215363103 223
1 9228363102 123
1 92 3363103 123
1 9218363103 523
1 92 3363103 123
1 92 9363103 123
1 92313631021123
1 9228363102 123
1 9217363102 123
1 9223363102 123
1 92 6363103 123
1 9217363102 523
1 92193631031123
1 9211363101 523
1 9217363103 123
1 92 4363101 223
1 9251363102 123
1 9211363103 123
1 9217363102 123
1 9221363103 123
1 9225363102 523
1 92 5363103 123
1 9211363102 123
1 9245363102 223
1 9212363103 123
1 9216363103 123
1 9232363102 123
1 9222363103 123
1 9220363103 523
1 9218363103 123
1 9234363103 123
1 92 6363101 123
1 9223363103 223
1 9220363103 123
1 9220363102 123
1 9216363103 123
1 9215363103 123
1 9245363102 123
1 9245363102 123
1 9213363103 123
1 9221363101 223
1 92 5363101 123
2 9236482302 123
2 9220482303 123
2 9226482302 223
2 9240482302 123
2 92 8482301 523
2 9223482302 923
2 9213482301 523
2 92 84823031123
2 9243482302 123
2 9234482303 523
2 9222482302 123
2 9213482303 123
2 9211482301 523
2 9226482302 123
2 9219482303 523
2 9220482303 123
2 9226482302 123
2 9225482303 123
2 92 9482303 823
2 92224823021123
2 92 5482301 523
2 9234482302 123
2 92 9482303 123
2 92 7482303 123
2 92174823011123
2 9216482301 523
2 9220482303 223
2 92 8482303 123
2 92 8482301 123
2 9223482302 123
2 92 6482303 123
2 92 6482301 123
2 92 5482303 523
2 92304823031123
2 9214482303 123
2 9211482303 123
2 9220482301 923
2 9225482303 523
2 92 8482303 123
2 9212482303 123
2 9217482303 123
2 9230482303 523
2 92 5482303 123
2 9213482303 523
2 92 6482303 523
2 9214482303 223
2 9221482303 123
3 9231482802 523
3 9211482803 523
3 9222482802 123
3 92 8482803 523
3 9223482803 123
3 9214482803 123
3 9215482803 123
3 9230482802 123
3 9226482803 123
3 9227482802 123
3 9218482802 123
3 92 5482803 123
3 9213482803 123
3 9233482802 123
3 92 4482801 123
3 92404828031123
3 9210482802 123
3 9216482801 523
3 92 9482801 123
3 9225482802 123
3 9234482802 123
3 92184828021123
3 9231482802 523
3 9234482802 523
3 9220482803 223
3 9212482803 123
3 92 14828031123
3 9227482803 123
3 9234482802 123
3 92 5482803 123
3 9232482802 523
3 9211482802 123
3 9222482803 123
3 9231482803 123
3 9222482802 223
3 9237482802 523
3 9229482803 123
3 92234828031123
3 9219482803 123
3 9214482803 123
3 9215482803 123
3 92384828021123
3 9220482801 123
3 92 3482803 523
3 9354304112 133
3 9316304113 133
3 9318304111 133
3 9333304113 133
3 9351304112 133
3 9337304112 133
3 9349304112 133
3 9328304112 133
3 9353304112 133
3 9326304113 133
3 9333304113 133
3 9335304112 133
3 9332304113 133
3 9323304113 133
3 9335304113 133
3 93233041131133
3 9331304113 133
3 9333304112 133
3 9331304112 133
3 9336304112 133
3 9327304112 133
3 9342304112 133
3 9335304113 133
3 9336304113 533
3 9336304113 133
3 9328304113 133
3 9333304112 133
3 9315304113 133
3 9333304112 133
3 9332304113 133
3 93 6304111 133
3 9334304112 133
3 9329304112 133
3 9344304113 133
3 9328304113 133
3 9327304112 133
3 9321304113 133
3 9326304112 133
3 9320304111 133
3 9314304113 133
3 9345304113 133
3 9325304112 133
3 9349304112 133
3 9328304113 133
3 9319304113 133
3 9321304113 133
3 9334304113 133
3 9329304113 133
3 9343304112 133
3 9345304113 133
3 9345304112 133
3 9319304113 133
3 93313041131133
3 93323041131133
3 9329304113 133
1 94105811131133
1 94415811121133
1 9422581113 133
1 9412581113 533
1 9413581113 133
1 9424581113 133
1 9411581113 133
1 94155811131133
1 94 7581113 133
1 9412581113 133
1 9411581113 133
1 9420581113 133
1 94335811131133
1 9421581113 933
1 94205811121133
1 9417581113 233
1 9434581113 133
1 9425581113 533
1 9421581113 133
1 94 8581113 133
1 94 4581111 533
1 9427581113 133
1 9424581113 133
1 9419581111 133
1 94 3581111 533
1 94 9581113 133
1 9422581112 133
1 9419581113 133
1 94 6581111 133
1 9516163802 123
1 9532163803 123
1 9517163803 523
1 9540163802 523
1 9526163803 123
1 9528163803 123
1 9529163803 123
1 9547163802 223
1 9524163802 123
1 9518163803 123
1 9526163803 123
1 9542163802 123
1 9516163803 123
1 9514163803 123
1 95 3163801 123
1 9521163803 123
1 9521163802 123
1 95201638021123
1 9511163803 723
1 9516163803 123
1 9516163803 123
1 9535163802 123
1 9540163802 123
1 9526163802 123
1 9511163803 123
1 9518163802 523
1 95 9163802 123
1 9528163803 223
1 9511163803 123
1 9516163803 723
1 9516163803 123
1 9521163802 123
1 9516163802 123
1 9514163803 123
1 9513163802 123
1 9523163802 123
1 9518163802 123
1 95301638031123
1 9517163803 123
1 95211638011123
1 9515163803 123
1 9526163803 123
1 95181638031123
1 9512163803 123
1 9526163802 123
1 9516163803 123
1 9513163803 123
1 9519163803 823
1 9523163802 123
1 9518163803 123
1 95 8163802 123
2 9513294302 123
2 9527294302 123
2 9515294302 123
2 9535294302 123
2 95 7294303 123
2 9529294303 723
2 9513294303 123
2 9523294303 123
2 95122943031123
2 9523294302 123
2 9539294302 123
2 9532294303 123
2 95152943031123
2 9527294302 523
2 9515294303 123
2 9516294301 123
2 9519294302 523
2 9527294303 223
2 95 7294303 123
2 9546294302 123
2 9510294303 123
2 9528294302 123
2 9515294301 123
2 95 8294303 123
2 95102943031123
2 9527294303 123
2 9523294303 123
2 95 52943031123
2 9526294301 123
2 9510294303 123
2 9520294302 123
2 9536294302 123
2 95 4294303 123
2 95402943021123
2 9532294302 123
2 9510294303 123
2 9536294302 123
2 9511294303 123
2 95 4294303 123
2 9528294302 123
2 9518294302 123
2 9529294303 123
2 9523294302 123
2 9525294303 123
2 9517294303 123
2 95472943021123
2 9514294302 123
2 9510294303 123
2 95232943031123
2 9527294303 123
2 9520294302 123
2 9514294303 123
2 95 9294302 123
2 9512294301 523
3 95352933021123
3 95262933031123
3 9517293301 523
3 9519293303 123
3 95272933031123
3 9517293303 923
3 9535293303 923
3 9525293303 123
3 9528293302 123
3 9515293303 123
3 9523293303 223
3 9543293302 123
3 95 6293301 523
3 95122933031123
3 9532293303 123
3 95122933031123
3 95 92933031123
3 95 7293303 123
3 9515293303 123
3 9537293302 123
3 9537293302 123
3 9520293302 123
3 9517293303 123
3 95 6293301 223
3 9535293303 123
3 9518293303 223
3 95282933031123
3 9532293301 923
3 9518293302 123
3 9538293302 123
3 95 42933011123
3 9530293302 123
3 9524293303 223
3 9511293301 123
3 95 7293303 523
3 9525293302 123
3 95352933021123
3 9535293303 123
3 9516293303 123
3 9524293303 123
3 95262933031123
3 9529293302 123
3 95 7293302 123
3 9519293302 123
3 9511293301 523
3 9512293303 123
3 95 6293302 123
3 9552293302 123
3 95 4293301 123
3 9559293302 123
3 9538293302 123
3 9537293303 123
3 9536293302 123
3 9522293301 123
3 9525293302 123
3 9522293302 123
3 9532293302 123
3 9520293303 123
3 9631322502 111
3 9625322512 111
3 96 7322503 111
3 9618322501 511
3 9625322502 111
3 9612322511 511
3 9627322513 111
3 9620322502 111
3 9619322503 111
3 9622322513 111
3 96 9322501 111
3 9616322502 111
3 96103225031011
3 9610322501 111
3 9638322512 111
3 9630322503 111
3 96 7322503 111
3 9614322513 111
3 9624322513 111
3 9614322502 111
3 9620322503 111
3 9625322503 111
3 9623322503 111
3 9614322513 111
3 9625322513 111
3 9617322511 111
3 9613322503 111
3 9630322512 111
3 9613322503 111
3 9615322513 111
3 96243225031011
3 9632322512 511
3 9632322512 111
3 9615322503 111
3 9627322502 111
3 96 9322503 511
3 9621322513 111
3 9620322513 111
3 9618322512 111
3 9629322513 111
3 9615322503 111
3 9617322503 111
3 96233225031011
3 9622322503 111
3 9612322502 111
3 9621322503 111
3 9614322503 111
3 96 9322511 511
3 9641322512 111
3 96 9322501 111
3 9620322513 111
3 9613322503 111
3 96323225021011
3 9618322513 111
3 9634322502 111
3 9620322511 111
3 96 9322503 111
3 9623322503 111
3 9622322503 911
3 9619322503 111
3 9631322502 111
3 9629322513 111
3 9623322503 111
3 9610322501 111
3 9632322512 111
3 9620322503 111
3 9629322502 111
3 9622322503 111
3 9610322501 511
3 9633322503 111
3 9615322503 111
3 96 5322513 111
3 9631322502 111
3 9610322502 111
3 9632322513 511
3 9616322511 511
3 96 8322513 111
3 96 9322501 511
3 96 4322503 511
3 9629322502 111
3 9630322502 111
3 9629322513 111
3 9637322512 111
3 9644322503 111
3 9615322503 511
3 9623322502 111
3 9628322503 111
3 9642322502 111
3 9622322503 111
3 9628322503 111
3 9622322513 111
3 96123225011011
3 9643322502 111
3 9620322502 111
3 9613322512 111
3 9617322503 111
3 9637322502 111
3 9640322502 111
3 9630322512 111
3 9628322502 111
3 9616322513 111
3 9625322503 111
3 96 8322511 111
3 9611322503 111
3 9619322502 111
3 9632322502 111
3 9612322513 111
3 9621322513 111
3 9621322513 111
3 9631322502 111
3 96 9322503 111
3 96 7322503 111
3 9628322512 111
3 9626322503 511
3 96 8322511 111
3 9635322502 611
3 9625322503 111
3 9620322503 111
3 9635322512 111
3 9629322513 111
3 9613322513 111
3 9616322513 111
3 9627322502 111
3 96 5322501 511
3 9616322513 111
3 9619322512 511
3 9615322513 111
3 9610322513 111
3 9633322512 111
3 9622322502 111
3 9629322513 511
3 9618322513 111
3 9619322503 111
3 9614322501 111
3 96 8322513 511
3 9732602013 111
3 97186020131111
3 97286020131011
3 9719602013 511
3 97 7602013 511
3 97 2602011 111
3 9720602012 111
3 9728602012 111
3 9716602013 511
3 9731602012 111
3 9723602003 711
3 9721602012 511
3 9712602011 111
3 97 16020111011
3 97246020031111
3 97 26020011111
3 97 6602002 111
3 9726602003 311
3 9728602012 311
3 9712602013 111
3 9725602002 211
3 9721602003 911
3 9712602001 511
3 9727602013 511
3 9737602012 711
3 97 7602001 211
3 9726602003 711
3 9713602003 111
3 9727602012 511
3 9732602013 111
3 9717602013 511
3 9717602012 511
3 9722602002 111
3 9722602002 111
3 9735602003 111
3 97 9602003 111
3 9728602013 911
3 9723602003 811
3 97306020031111
3 9713602011 311
3 9722602013 111
3 97316020031111
3 9712602013 111
3 9710602003 111
3 97 2602003 111
3 9727602012 611
3 97 3602001 511
3 9716602001 511
3 97 4602002 111
3 97 5602003 511
3 9722602001 411
3 9715602013 511
3 9725602002 511
3 97 6602001 511
3 9716602013 511
3 9712602003 311
3 9735602003 111
3 9712602003 111
3 97 3602013 511
3 9713602003 111
3 9712602003 111
3 9736602012 111
3 9742602003 711
3 9736602001 811
3 9723602002 111
3 9717602003 711
3 97 5602013 111
3 9711602001 111
3 9724602003 111
3 9714602003 511
3 9720602012 511
3 9711602001 511
3 97 8602011 111
3 97 5602013 511
3 9724602002 511
3 9710602013 111
3 9710602003 111
3 9719602003 211
3 9720602003 511
3 9732602002 111
3 9726602013 511
3 9717602013 511
3 9720602003 511
3 9711602012 511
3 9735602013 111
3 9741602003 511
3 9733602013 111
3 97 4602011 511
3 9717602012 111
3 9739602002 811
1 9821411902 111
1 9820411902 111
1 98 7411911 111
1 98 4411911 111
1 9829411902 111
1 98 9411903 111
1 98214119031011
1 9842411902 911
1 9817411902 511
1 9832411902 111
1 9812411903 111
1 98 6411913 111
1 98 2411901 511
1 98 1411901 111
1 9818411903 511
1 9819411912 111
1 98 3411903 111
1 9816411903 911
1 9817411902 111
1 98 1411901 111
1 9815411903 711
1 98 9411911 111
1 9821411903 111
1 98 1411901 111
1 98 74119011111
1 9824411913 111
1 98 7411903 111
1 9810411911 911
1 9814411903 111
1 98 5411913 111
1 98 4411901 111
1 9817411901 711
1 9847411902 711
1 98 94119111011
1 9827411901 111
1 9827411912 111
1 9819411903 711
1 9841411902 111
1 9813411903 111
1 98 1411901 111
1 98 6411903 111
2 98 4671301 911
2 98 3671302 111
2 9830671303 911
2 9822671303 111
2 9818671301 111
2 9835671303 511
2 9821671303 511
2 9810671313 111
2 98 76713131111
2 9815671303 511
2 9832671302 111
2 9831671313 511
2 9824671303 111
2 98 3671301 111
2 9811671301 511
2 98 4671303 111
2 9815671303 111
2 9812671303 111
2 9813671303 611
2 98 1671311 111
2 98 7671311 111
2 9813671303 511
2 98196713031011
2 98 1671303 111
2 98 8671303 111
2 9824671301 611
2 9816671313 111
2 9827671312 111
2 98 7671311 411
2 98 1671303 111
2 9821671312 111
2 9812671302 111
3 9828672413 111
3 98 5672402 111
3 9815672413 111
3 98 9672402 111
3 9832672403 111
3 9817672403 911
3 9819672413 111
3 9843672413 911
3 98 7672411 111
3 9818672401 111
3 9833672403 911
3 9824672403 111
3 9815672403 111
3 98 7672403 111
3 98 8672412 111
3 9838672402 111
3 98 6672413 111
3 9830672402 611
3 9835672402 111
3 98 6672413 111
3 9830672403 111
3 9829672413 411
3 9822672402 111
3 98 9672403 411
3 98 3672411 111
3 9818672401 111
3 98 8672403 111
3 9838672402 111
3 98 2672413 111
3 9830672403 111
3 9825672412 111
3 9824672402 111
3 9811672412 111
3 9826672413 111
3 98 5672403 611
3 9830672402 111
3 9814672402 111
1 9933352213 131
1 9915352213 531
1 9949352212 131
1 9910352213 531
1 99 2352211 531
1 9916352213 531
1 9922352213 131
1 99223522131131
1 9914352213 531
1 9932352212 531
1 9919352213 531
1 9913352211 731
1 99293522131031
1 9922352213 131
1 9918352213 231
1 99123522131131
1 9913352213 531
1 9910352213 531
1 9921352213 531
1 9922352211 531
1 9920352213 531
1 99 9352212 131
1 99 2352213 531
1 9919352213 131
1 9912352211 531
1 99 6352213 131
1 99203522131031
1 9938352213 731
1 9921352213 531
1 9913352211 531
1 99 4352213 531
1 99 1352211 531
1 99 2352211 531
1 99 9352211 531
1 9938352212 431
1 9912352213 531
1 99 83522111031
1 9931352213 631
1 9924352213 631
1 9913352211 531
1 9917352213 531
1 9919352213 631
1 99423522131131
1 9919352213 531
1 9917352213 531
1 9950352212 131
1 9932352212 131
1 9936352212 531
1 9937352213 531
1 9919352213 531
1 99 2352211 131
1 9925352213 731
1 9912352213 531
1 99303522121031
1 9934352212 831
1 9917352211 531
1 9918352212 531
1 9924352212 131
1 99 7352213 531
1 9917352213 531
2 9949561812 131
2 9937561813 531
2 9923561813 231
2 9929561813 731
2 9948561813 131
2 9910561811 531
2 9933561813 231
2 99 7561811 131
2 9910561811 131
2 99 7561811 131
2 9913561813 131
2 9918561813 731
2 99 65618111031
2 9933561813 531
2 9915561811 231
2 9954561812 831
2 9938561812 131
2 9931561813 131
2 9928561812 131
2 9948561812 131
2 9910561811 531
2 9930561813 731
2 9921561812 231
2 9926561812 931
2 9942561812 131
2 9910561811 131
2 9913561811 531
2 9913561813 131
2 99 4561813 531
2 99 8561811 831
2 9942561812 131
2 9910561811 231
2 99395618121031
2 9914561811 531
2 99 8561813 531
2 9917561813 531
2 99 4561811 131
2 9915561811 531
2 9917561813 131
2 9919561811 131
2 99 9561811 731
2 9941561812 531
2 9917561813 231
2 9914561813 531
2 9923561813 131
2 9910561813 531
2 9920561813 531
2 9921561813 531
2 9922561811 131
2 99385618111031
2 9912561811 731
2 99 45618111031
2 9911561813 531
2 99 8561812 531
2 9940561813 531
2 9913561811 731
2 99 35618111031
2 9935561813 531
2 9926561812 131
2 9926561813 131
2 9923561811 531
3 9929561912 131
3 9917561913 531
3 9910561913 531
3 9930561913 631
3 9933561913 531
3 9920561913 531
3 99 4561911 531
3 9925561913 531
3 99195619131031
3 9912561913 531
3 9935561912 531
3 9919561912 731
3 9911561913 531
3 9952561912 131
3 9925561912 531
3 99 1561911 531
3 9933561913 231
3 9943561913 531
3 99 7561913 531
3 9955561912 231
3 99225619131131
3 9926561913 531
3 9919561911 531
3 9926561913 531
3 9928561913 131
3 9937561912 131
3 9916561911 731
3 9923561912 131
3 9921561913 731
3 99365619131031
3 99 45619111031
3 9947561912 231
3 9929561912 131
3 9922561911 531
3 9917561913 531
3 9941561913 231
3 9924561911 531
3 99135619111031
3 9910561913 731
3 99 5561911 831
3 9916561913 131
3 9921561913 131
3 9928561913 531
3 9932561913 531
3 99 9561911 731
3 9930561913 731
3 9933561913 131
3 9927561913 631
3 9933561913 231
3 9924561912 131
3 9922561913 931
3 9910561913 531
3 9939561913 531
3 9933561913 231
3 9939561913 231
3 9918561912 731
3 9947561913 131
3 9940561913 131
1100 2272401 511
1100 4272401 511
110020272403 711
1100 5272401 511
110027272412 111
110022272403 111
110029272402 111
1100 6272413 511
110035272412 211
110042272412 111
110017272403 111
110024272403 711
110023272403 111
110014272413 111
110033272413 111
110030272402 111
110024272413 511
110020272403 111
110014272413 511
110028272413 111
110016272411 111
1100 5272401 511
110025272412 111
110012272413 111
110019272413 511
110037272413 111
1100 6272413 511
110021272403 111
110029272403 111
110024272413 111
110013272413 111
110015272403 511
1100 6272411 111
110031272403 111
110013272403 111
110026272412 111
110034272413 111
110019272413 111
1100 5272403 111
1100 3272413 111
110017272411 111
110027272402 111
110026272402 811
110020272413 111
110041272402 111
110023272412 111
110031272403 811
110033272403 111
1100 4272401 511
110018272403 111
110023272413 111
1100 7272413 111
110023272412 111
110035272412 111
110037272412 111
110019272411 111
110021272412 111
110013272403 211
110030272402 111
110031272412 111
110016272403 111
110011272403 111
110011272403 111
110039272402 711
110027272413 111
110018272413 111
110027272402 511
110016272413 111
110021272402 111
1100 5272401 211
110019272413 511
110028272402 111
110121332403 521
110118332401 521
110119332403 121
1101 8332403 521
110121332403 521
110134332402 121
110111332403 521
110117332403 121
110114332401 521
110129332402 521
110113332403 121
110132332402 721
110146332402 821
110124332403 521
1101193324031121
1101 6332401 121
110115332403 521
110151332402 721
110118332403 521
110121332403 121
110115332401 521
1101 3332401 521
110128332403 521
110111332401 121
1101 6332401 521
110113332403 521
110117332402 121
110159332402 121
1101 4332402 121
1101103324031021
110117332403 521
110117332403 121
110129332402 121
110121332403 521
1101 5332403 121
110117332402 221
110116332403 521
110118332403 121
110140332402 121
110126332403 121
1101 7332401 521
110131332402 721
110114332403 521
110210561503 421
110245561502 821
1102 9561502 121
1102 5561501 421
110226561502 521
110256561502 821
110224561502 121
110211561503 521
110211561503 121
110254561502 521
110235561501 421
1102 3561501 121
110240561502 121
110210561503 421
110227561503 121
110218561502 121
1102 6561501 421
110237561502 121
110229561503 121
110219561501 421
110212561503 121
110225561502 121
110210561503 121
110231561502 121
110234561503 421
110223561503 421
110232561502 121
110212561501 421
110235561502 121
1102 85615031121
1102 15615011021
1102 8561502 121
110210561503 121
110238561503 121
110230561503 121
1102 7561503 121
1102 6561501 421
1102 1561501 421
110228561502 121
1102 7561501 121
110217561503 121
110248561503 121
1102 8561503 121
110210561503 121
110233561502 121
1102 3561501 421
110230561501 421
110227561502 121
110216561503 121
110229561501 421
1102 6561501 421
110227561502 121
110217561502 121
110223561503 121
110219561503 221
110221561503 121
1102 8561503 121
110226561503 421
1102 4561502 121
110235561501 421
110214561503 421
110245561503 421
110239561503 421
110252561503 421
110219561503 421
110230561503 121
1102 6561501 421
110216561503 421
1102 8561501 421
110222561503 421
110224561503 121
110230561502 121
110219561503 121
1102 2561501 121
110240561503 121
2102 4751401 121
210231751403 121
210227751402 421
210218751403 121
210215751402 121
210229751402 121
210233751402 121
210224751403 121
2102 3751403 121
210217751401 421
210266751402 121
210227751401 421
210217751403 421
210229751403 421
210231751402 121
2102 2751401 121
210213751401 421
2102 2751401 421
210245751403 821
2102 4751403 121
210253751403 421
210245751402 121
2102 4751401 621
210224751403 421
210231751402 121
210215751401 421
2102 4751401 421
2102 6751401 421
210241751403 121
210210751403 121
210220751401 821
2102 7751403 221
210224751401 421
210257751402 121
210222751403 221
210211751401 121
210223751403 121
2102 9751401 421
210228751403 121
210229751403 121
2102 9751403 721
210249751403 421
210217751403 121
210231751401 421
210214751401 421
210222751401 421
210261751401 421
2102 4751403 421
2102 6751403 121
310237751103 421
3102117511011121
310220751102 421
3102 7751103 121
310233751103 121
310219751103 121
310227751102 121
310217751101 421
310226751103 121
3102 6751103 121
310212751102 421
310214751103 121
310214751103 821
310231751103 121
310241751103 821
310211751103 221
310247751101 921
3102 4751101 821
3102 4751103 121
3102 37511031121
310214751103 121
3102267511031121
310237751103 121
3102 9751103 421
310222751103 921
310223751101 421
310210751101 421
310227751103 121
310256751102 321
3102 47511021121
3102 5751103 421
2103 75623111011
2103455623121111
2103 2562311 111
2103 4562303 511
210327562313 511
2103 8562303 111
210318562311 511
2103235623131111
210316562303 111
210318562311 211
210340562312 111
2103 9562303 111
210319562301 111
2103 7562313 111
210329562313 511
2103135623031111
210317562313 511
2103 3562303 111
210319562313 111
210346562303 111
210313562313 311
210313562313 811
2103425623131111
210345562312 111
210323562311 911
210311562311 911
210310562313 111
210362562312 811
2103245623131111
210321562313 911
210329562303 311
210351562312 111
2103 4562303 111
210313562302 511
210323562303 111
210316562313 111
2103 4562311 311
210317562311 511
2103535623121111
210322562313 511
210329562312 111
210343562303 911
210328562313 111
2103 7562313 111
2103 3562301 311
210324562303 111
210350562312 511
210325562303 811
210323562302 511
2103 55623011111
210321562313 111
210310562313 511
210327562303 111
210315562311 111
2103 6562303 111
210314562302 311
2103165623131111
210320562313 511
2103 8562303 511
2103 6562303 111
210329562313 311
2103 9562313 511
2103 7562301 311
210339562312 111
2103 1562302 111
2103265623131111
210340562312 111
210343562312 211
2103365623021111
210319562311 311
2103 5562302 111
2103 2562301 311
210346562312 311
210418561113 511
210417561103 111
2104 9561101 511
210416561113 111
210438561112 111
210426561112 111
210414561113 111
210437561102 111
210413561103 611
210422561103 511
210429561103 711
210424561113 111
2104 6561111 511
210422561102 111
210423561103 711
210413561111 511
2104 2561103 111
2104185611011111
2104185611011011
210425561113 111
2104 7561102 111
2104 9561113 111
2104 2561101 111
2104125611111011
2104125611031011
210417561111 511
2104 85611011011
2104 95611131011
210412561113 511
210418561103 511
210413561111 511
210412561103 511
210416561101 611
210422561103 511
2104 7561103 511
2104 3561113 111
2104 1561101 111
210432561102 111
210416561112 111
2104 9561103 511
210428561102 111
2104 7561101 511
210411561111 111
2104 9561101 111
210421561113 111
210419561102 111
210422561113 111
210432561102 611
210412561103 111
210411561111 511
2104 8561111 311
210426561103 111
210423561111 511
210411561111 111
210423561101 411
2104 6561101 511
210429561113 111
210420561103 111
210411561103 511
210410561103 111
210412561111 511
2104 8561101 711
2104 4561111 611
210424561112 111
2104 9561101 711
210436561112 111
210439561103 111
210432561101 911
2104145611031011
210412561111 511
2104 6561111 511
210411561103 511
2104 1561111 111
210427561113 111
2104 8561103 111
210423561103 411
210423561103 511
210432561101 511
210428561113 111
210415561103 611
210425561102 111
210414561101 511
210412561101 111
210423561111 111
210433561113 911
210414561111 511
210411561113 111
310411561211 511
3104 5561201 711
3104 7561203 511
3104 5561211 511
310422561201 811
310447561202 411
310434561202 211
3104 1561201 111
3104115612021111
310414561203 511
3104 8561201 111
3104185612131111
310411561203 111
3104 4561203 111
3104 7561213 511
3104155612031011
3104 4561201 211
310410561203 511
310423561203 711
310429561203 511
3104245612131111
310432561213 111
310442561203 811
310415561202 411
3104 1561201 411
310419561211 511
310436561202 111
310422561202 111
310435561202 111
310452561202 111
3104 6561203 111
3104135612131011
310416561213 111
3104 7561213 111
3104 2561201 111
3104 8561213 511
310427561202 111
3104 8561203 111
3104 2561213 111
3104 1561211 111
310444561202 111
3104 1561203 411
3104 4561201 111
310411561203 111
310438561212 211
310419561203 511
310425561213 511
3104 7561203 511
3104 35612031011
310428561202 111
3104 3561213 111
310412561201 211
3104 5561203 111
310432561203 211
3104205612031011
310420561213 511
310413561211 111
3104 3561211 511
3104265612031011
310411561201 511
310417561212 511
310436561213 511
3104115612111011
310414561203 111
310421561212 511
3104 8561213 111
310429561201 111
3104135612111011
310445561213 211
3104 4561212 111
3104 8561213 511
310413561201 611
21051353 901 521
21051153 901 521
21051153 9011121
2105 553 903 521
2105 253 901 521
21051253 903 521
21051053 901 521
21052353 903 521
2105 653 901 821
2105 853 903 421
21052953 903 621
21051653 901 521
21052153 901 821
2105 153 901 521
21051353 903 121
21051453 903 321
2105 353 901 721
21052953 902 821
21053253 901 821
21051053 903 121
2105 553 901 121
2105 453 903 521
21052053 903 121
2105 553 901 521
21051953 903 121
2105 853 902 421
2105 953 901 821
21052553 902 821
2105 753 901 721
21051553 903 121
21051153 903 121
2105 453 901 621
21051253 901 221
21052753 903 821
21051853 903 821
2105 853 901 521
21052353 902 521
21051553 901 521
21051953 903 821
2105 953 903 521
2105 253 901 521
21053253 903 821
21053553 9021021
21051953 903 121
2105 253 903 521
21051653 903 121
2105 753 902 521
21053453 902 521
21051653 901 721
2105 153 903 521
21054753 903 821
21051853 901 521
2105 853 901 821
2105 753 901 521
2105 353 901 121
2105 553 903 521
21051453 9031021
21051453 903 521
21053553 903 521
2105 553 901 521
21053253 903 821
21051353 901 821
21051453 9031121
21051453 903 321
2105 853 903 521
21052353 903 521
21053253 901 721
31051853 903 121
3105 653 903 521
31051253 901 521
3105 853 903 621
3105 653 901 821
3105 253 903 121
31052953 903 121
31054053 903 121
31051353 901 121
3105 153 903 521
31051853 9021121
31051153 903 721
31053153 902 121
3105 853 901 121
3105 453 901 521
31052953 902 521
3105 153 901 121
3105 853 903 521
31051453 903 121
3105 453 903 521
3105 853 901 121
3105 653 901 521
3105 753 903 521
31052153 903 121
3105 253 901 621
31052453 902 121
3105 953 903 521
31054753 903 121
31051453 903 121
3105 953 903 521
31053053 902 521
31052753 902 121
31054053 902 221
3105 953 901 521
3105 653 901 521
31053853 902 521
31052753 903 521
31052453 902 121
31052153 903 121
31052153 903 521
31051353 9011021
3105 653 9031121
31053353 903 221
31051753 903 521
31051353 903 521
31051953 9031021
31052853 903 821
3105 853 903 121
210631511012 511
2106 15110111111
210618511003 111
210622511013 111
210620511013 511
210620511003 111
210615511013 511
210622511013 111
210615511003 111
2106 85110011011
2106 3511001 511
2106 8511001 111
2106215110131011
210622511002 111
2106 4511001 711
210624511013 911
2106 9511013 211
210614511011 511
210617511002 111
210615511011 111
210610511003 511
210611511011 511
2106 4511002 111
210619511002 111
2106 6511013 511
2106225110031011
210628511002 611
210615511013 511
210613511012 111
210612511011 711
210617511013 111
210618511003 111
210615511003 511
2106 65110031111
2106 5511011 511
210617511012 111
2106 9511001 511
210620511013 111
2106165110031011
2106 55110031111
2106 75110011011
210620511013 511
2106 1511011 111
2106 9511001 111
2106115110011111
2106 4511003 111
2106 45110011011
210616511013 111
210621511012 111
210611511001 511
210620511011 511
2106185110031011
2106135110111011
210628511003 711
2106 3511003 111
210611511001 511
2106 1511003 111
210618511011 511
210618511013 111
210632511002 511
2106 5511013 511
2106165110131011
3106 851 911 711
31063251 913 211
31061351 911 511
3106 651 901 511
3106 651 901 511
31061051 911 611
31061251 911 111
31062851 902 111
31061051 901 111
3106 451 903 511
3106 351 911 511
31061051 911 111
31061251 913 411
31065751 902 511
31063251 9031011
31062751 903 811
31062651 9131111
31063051 912 511
3106 951 9111111
3106 951 913 511
31063151 9131011
31062651 913 511
31061851 903 511
31062951 913 111
31061651 913 811
31061551 911 111
31061251 9011111
31064051 912 111
31062051 9131111
3106 451 911 511
31064051 902 411
31062251 913 411
3106 851 901 211
31062251 911 411
31062351 913 711
31061551 9011011
31063351 903 511
3106 551 911 511
31062051 913 511
31062151 912 111
31061351 911 511
3106 651 911 511
31061751 911 211
31062451 913 511
31062251 913 511
210720571312 511
2107 1571301 111
2107 8571303 511
210719571313 511
2107 2571301 111
2107 8571302 511
210711571313 511
210712571303 211
2107175713031011
2107235713031011
210714571303 111
2107 8571303 511
210727571313 511
210710571301 111
2107 45713131111
2107 6571301 111
2107 8571311 511
210718571303 511
2107 4571303 511
210720571312 611
210727571313 511
2107 2571303 111
2107 4571303 511
210714571303 511
2107 3571303 111
2107 2571301 511
210726571313 511
2107 9571303 611
2107 3571311 511
210722571303 511
210710571303 211
210714571303 211
210710571301 111
2107 6571301 111
210719571303 111
2107 1571303 211
210724571303 511
210727571303 111
310711571911 511
3107 6571911 511
310732571912 211
3107 6571911 111
310720571913 511
310726571902 111
310729571902 511
310716571913 111
310730571913 511
310729571912 111
3107 2571911 111
3107 1571903 111
310722571903 111
3107 1571901 111
3107 25719011011
310716571901 111
310721571911 511
3107 5571901 111
310714571913 511
310722571903 111
310734571912 511
3107 8571903 111
310720571902 111
310713571901 511
310717571902 111
310712571913 511
3107 9571903 111
310731571903 511
310721571903 111
310725571902 111
3107 5571902 111
310817302313 131
310829302311 731
310823302312 531
310810302311 531
310820302312 131
3108 1302313 131
310826302313 131
310811302313 131
3108413023121131
310814302311 131
310832302313 131
310829302312 131
310835302312 131
310841302313 131
310819302313 531
310837302313 231
310827302313 131
310824302313 131
310820302313 531
310822302312 131
310858302312 131
310816302313 131
310824302313 131
310842302312 131
3108 5302311 131
310839302312 131
310819302313 831
310828302312 131
3108 6302311 131
3108 4302313 131
310838302312 731
310834302313 231
310854302312 131
310810302311 531
3108 5302311 531
310818302313 131
310812302313 131
3108173023131131
310838302312 131
310833302312 131
310836302313 131
310818302313 631
3108443023121131
3108 73023111131
310812302313 131
310824302313 731
3108 6302313 131
310815302312 131
3108373023131031
310819302313 231
310834302312 131
3108 4302313 131
310813302311 131
310815302312 531
310816302312 131
310815302313 131
310833302313 531
3108 9302311 531
310813302311 131
310826302312 131
310829302313 531
310847302312 831
310845302313 931
310816302313 131
310810302313 131
310811302313 531
310813302311 131
310816302313 231
310833302313 131
310845302312 131
310814302313 131
310814302313 531
310837302312 131
310830302313 131
310822302313 531
310817302313 131
3108 8302313 131
310814302311 131
3108 4302311 131
310829302313 331
310816302312 531
310815302311 731
310818302313 531
31091291 311 431
3109 591 313 131
31092991 311 431
31091391 311 431
3109 291 311 131
31093591 311 831
31092891 313 431
31092491 313 831
31091291 311 831
3109 891 313 431
3109 391 313 431
31092991 311 431
31095091 312 731
31094391 311 431
31092891 313 431
31092391 311 431
31094391 313 431
31091291 311 431
31094291 311 431
31092391 313 431
31093591 311 431
31091591 311 431
31091191 311 431
31094391 313 431
3109 591 311 431
31093191 311 431
31093491 313 431
3109 691 311 431
31092591 313 431
31092591 313 431
31092891 311 431
3109 391 311 131
31091991 313 431
31093591 313 131
111017342101 121
1110233421031121
1110 3342103 521
111030342102 121
111022342103 121
111017342103 121
1110 9342102 521
111014342103 621
111033342102 121
1110253421011121
1110 4342101 521
1110 4342103 521
111026342102 121
1110 6342103 121
1110 1342101 121
111011342103 121
111032342103 121
111020342102 121
111029342101 221
1110 4342102 121
111017342102 121
1110143421011021
1110 8342101 121
1110 5342101 521
1110 7342101 121
111015342103 521
1110 6342101 521
1110 9342101 521
111023342102 921
111020342102 521
111040342103 621
111030342103 121
1110 7342103 521
111013342103 521
111024342102 521
111012342103 521
1110 1342103 521
111024342103 121
111043342103 221
1110 2342103 121
1110 1342103 521
111035342102 121
111012342103 121
111029342102 521
1110 5342101 521
1110473421021121
111012342103 521
111033342102 121
1110193421011121
111022342103 521
1110 6342103 121
1110 3342101 521
111020342103 121
1110 13421011121
111014342101 521
1110 2342101 521
1110 93421031121
111035342102 121
111012342103 121
1110 2342103 121
1110 3342103 121
111015342103 521
111013342102 521
1110 6342102 121
1110 9342102 121
111018342103 221
3110 6371403 121
3110 2371403 521
3110 1371401 521
311022371403 221
311011371402 121
311023371403 721
311016371401 121
311031371403 521
3110 9371403 521
3110 6371403 121
311034371403 121
3110 5371401 521
3110 5371403 521
311028371401 121
3110 3371403 521
3110163714031121
311018371403 521
3110 2371401 521
3110 3371403 521
311039371402 121
311018371401 721
311030371402 121
3110 9371403 121
311027371402 121
311011371403 121
311029371403 521
311035371402 121
3110 6371401 521
3110 5371403 521
3110 5371403 221
311021371402 521
311015371403 121
311036371403 521
311011371403 521
311029371401 621
311010371401 521
3110 2371401 521
311015371403 521
3110 3371402 521
311031371402 121
3110 7371403 521
3110223714021121
311010371403 521
311042371402 121
3110 2371403 521
3110 9371403 121
3110 3371403 521
311041371402 121
3110 1371401 521
311012371403 521
311017371403 521
311026371403 521
3110 6371401 121
311018371403 121
311021371402 121
3110 2371401 521
3110 3371401 121
311020371402 121
3110213714031021
3110 4371403 521
311015371402 521
3110 3371403 121
311043371402 121
111120342012 111
1111 3342001 111
1111 1342003 111
1111 93420031011
1111 5342011 111
111110342003 111
1111 7342011 111
1111 3342003 111
111133342002 111
111122342002 111
111118342003 111
111116342013 111
111128342012 111
111123342003 511
1111 5342003 111
111114342013 111
1111 8342013 111
111127342012 511
111112342013 111
111113342002 111
1111 2342011 111
111112342003 111
1111 1342003 511
1111 3342003 111
1111 1342003 111
1111 6342013 611
111115342003 111
111116342003 111
111125342012 111
1111 6342003 111
1111143420131011
1111 5342013 111
111117342003 111
1111 9342002 111
1111 3342001 111
1111 6342011 511
1111 1342001 111
111130342003 111
111121342002 111
111123342003 111
1111 33420111011
1111 2342003 111
1111 5342013 111
1111 6342003 511
111125342012 111
111114342013 111
111130342003 111
1111 1342001 111
111118342002 111
1111 9342013 111
1111 3342001 111
1111 1342011 111
1111 2342003 111
111113342013 111
111127342003 111
1111 4342003 511
111117342012 111
111117342003 511
111122342012 111
111111342013 111
1111 5342012 211
111124342002 111
111119342003 111
111114342003 111
111118342002 111
111116342003 111
111121342002 111
111122342003 611
1111 4342011 111
111111342011 511
1111 8342002 111
1111 6342011 111
1111 1342001 111
111110342003 511
2111 8501802 111
211119501813 111
211121501803 911
2111 2501811 111
211111501801 111
211121501803 111
211136501802 111
211113501813 111
211113501801 511
2111 8501801 111
211119501813 111
211118501813 511
2111 5501803 111
211117501813 111
2111 1501811 111
211114501812 111
211118501803 111
211116501813 111
2111 5501803 111
211141501802 111
2111 8501813 111
211110501801 111
211133501802 111
211114501803 111
2111 8501801 111
211110501813 111
211111501811 111
2111 9501811 511
2111 3501811 111
211115501803 111
211120501812 111
211120501802 111
211122501803 511
2111 5501802 511
211113501813 511
211113501802 111
2111415018031011
2111125018031011
211117501802 111
211115501813 111
2111 2501811 111
2111535018021011
211140501802 111
211110501803 511
2111 1501803 111
211123501802 111
211114501813 511
211112501813 111
211113501813 111
211114501803 111
2111 8501813 111
211110501813 411
211115501813 511
211137501803 711
2111 4501803 611
211118501813 111
211124501812 111
2111 2501813 111
2111 1501803 111
2111 4501803 111
211120501813 111
211121501803 111
211115501813 111
2111 7501802 111
211140501802 111
211120501812 111
211113501813 511
211110501803 711
311112501912 111
3111 1501901 111
311120501903 111
311134501912 111
311125501902 111
3111175019011011
311118501902 111
311119501913 111
311131501913 111
311119501903 111
311116501912 511
3111 1501903 111
311118501912 111
311133501913 111
311116501912 111
3111 65019111011
311130501912 111
3111 6501903 511
311112501911 111
3111 7501903 111
311131501913 111
3111195019031011
3111 7501903 111
3111 3501913 111
3111 8501903 111
311111501913 111
3111 75019011011
3111 4501911 111
311114501913 111
311129501912 111
3111 85019031011
3111 8501911 111
311112501913 111
3111 9501903 411
3111 5501901 111
3111 6501911 111
311117501913 111
3111 6501902 111
311111501901 111
311114501913 111
3111 5501903 111
3111145019111011
311113501913 111
3111 4501912 511
311119501912 111
311110501901 111
311114501903 111
3111 5501901 111
311143501912 111
311131501912 111
3111195019031011
311116501913 111
311127501903 111
3111 1501902 111
3111 3501903 111
3111 8501913 111
311128501903 511
311113501911 111
311114501913 511
3111 8501903 111
3111 9501903 111
311130501913 211
3111 25019131111
3111 3501911 511
311118501903 111
311112501903 111
311142501912 111
3111 2501903 111
311134501903 511
3111 4501913 111
111217372903 121
111225372902 121
111238372902 921
1112 9372901 521
1112 2372903 121
111246372902 821
111221372903 121
1112 7372901 121
111232372902 521
111228372902 121
111222372902 121
111222372902 121
111226372902 521
1112 3372902 121
1112 7372901 121
111234372903 121
1112 6372903 121
111230372902 521
111225372903 121
111232372903 221
111212372901 121
1112 9372902 121
1112 7372901 121
111242372902 121
111210372901 121
111224372903 521
111224372903 521
111235372902 821
1112 7372903 121
111238372903 521
111234372903 821
111229372902 121
111214372902 121
111213372903 121
111218372902 121
111243372902 121
1112 2372901 221
111211372901 121
111239372903 521
1112 6372901 521
111222372903 821
111219372903 521
1112403729021121
111222372902 121
111214372903 521
1112 8372903 521
111217372903 521
1112 8372903 121
111230372902 521
1112 3372903 121
111233372902 121
111326142702 122
111330142703 122
111331142701 522
111331142702 122
111321142702 222
1113 61427021122
111346142702 122
111327142703 122
111319142703 522
111318142703 522
1113 9142703 122
111341142703 222
1113 5142703 122
111346142703 622
111329142702 122
111327142703 122
111333142701 122
1113 71427011122
111318142703 122
1113 3142701 122
111343142702 122
111322142702 122
111345142702 122
111353142703 522
111353142703 622
111358142702 622
111317142703 122
111357142702 122
111319142703 122
111313142703 122
111339142702 522
111319142702 122
111317142703 122
111315142702 122
111349142702 622
1113301427011122
111313142701 122
111318142702 122
111316142702 122
111318142703 122
111318142701 222
111317142703 122
111317142703 122
111341142703 122
111319142701 222
2113497826031122
211318782601 922
211335782603 122
211311782603 122
211332782602 122
2113 2782603 122
211361782602 122
211332782602 122
211313782603 522
2113217826031122
211346782602 722
211326782603 122
211316782603 122
211328782603 922
211321782603 522
211321782603 122
211341782603 122
211321782603 722
211334782603 122
211337782603 122
211329782602 522
211356782602 122
211318782602 122
211328782602 122
211326782603 122
211342782603 122
211327782603 122
211323782603 122
211311782602 122
2113127826031122
211316782602 122
211327782603 122
211335782603 122
211328782603 122
2113187826031122
3113 3782501 122
311321782503 522
311334782503 122
311322782503 122
311333782503 122
311330782503 122
311316782501 222
311350782502 122
311340782503 822
311315782502 122
311342782502 722
311334782502 122
311312782503 122
311327782503 122
3113 2782501 522
311317782503 122
311337782503 122
311311782503 122
3113 3782501 122
311341782503 222
311337782502 122
311334782503 122
311331782503 122
3113 4782501 522
311312782503 122
311330782502 122
311322782503 122
311338782502 122
311326782502 122
311340782502 122
311343782503 122
3113 6782503 122
311337782502 122
311336782503 122
311314782501 122
311324782502 122
311320782503 122
311344782502 122
311332782503 122
311320782503 122
111411192801 121
111435192802 121
111420192802 121
111436192802 621
1114 7192803 121
111463192802 121
111461192802 121
111431192802 121
111429192802 121
1114 2192801 121
111414192803 521
111432192803 121
1114 1192801 121
111435192803 121
111426192803 121
111454192802 121
111415192803 521
111421192803 121
111436192802 121
1114411928021121
1114 5192801 121
1114 5192803 121
111424192801 921
111418192802 121
111437192803 121
111410192803 621
111431192803 121
1114 9192803 121
1114101928031121
1114271928031121
111449192802 121
111433192802 121
111450192802 121
111432192803 121
111416192803 521
111413192801 121
111429192802 121
111411192801 121
111541441302 121
111515441301 121
111517441303 521
111515441303 521
111524441303 521
1115 5441301 521
1115 5441301 121
111521441303 521
1115 7441303 121
111514441301 521
1115 3441303 121
1115 84413031121
1115 5441302 121
111520441303 321
1115 4441303 521
1115 1441301 521
111535441303 521
1115 2441301 521
111512441303 521
111512441303 121
111520441303 521
1115 9441301 521
111527441303 721
1115 4441303 121
111528441303 521
111513441303 521
111514441303 521
111523441303 521
111511441301 521
1115 3441301 521
111530441302 121
1115284413031121
111515441303 121
1115 7441303 521
1115 6441303 121
111511441303 521
1115 5441303 521
111527441302 221
111511441301 121
111542441302 121
111517441303 521
1115 6441303 121
111548441303 121
111534441302 121
111514441303 321
1115 2441301 521
111525441303 121
111510441303 521
2115 1571701 521
211522571702 121
2115 7571703 121
211517571703 121
2115 2571703 521
211517571703 121
211555571702 121
2115 3571703 521
211514571703 521
211517571701 121
211521571702 121
211513571702 121
211519571702 121
2115 2571701 521
211513571703 121
211510571702 121
211521571703 121
2115 1571701 521
2115 8571703 121
211532571703 521
211517571703 521
211513571703 621
211520571702 121
211523571701 721
211520571703 421
211524571703 121
211510571701 121
2115 8571702 521
2115 4571701 121
2115 6571701 521
211520571703 121
211562571702 621
2115 9571703 321
211520571701 821
2115 8571701 521
2115 2571703 521
2115 1571703 521
211512571701 521
211510571703 121
211523571703 521
211516571703 121
211545571703 421
211517571703 521
211535571702 121
211540571702 221
211526571703 521
3115 9571201 121
311510571203 521
3115255712031021
311520571203 521
3115 4571202 121
3115485712031021
3115 8571203 521
3115 5571203 521
311518571203 121
311514571203 521
311516571203 521
311528571203 521
311519571203 121
311516571201 121
3115 4571201 121
3115 4571203 121
311519571202 321
311523571203 721
3115 8571201 121
3115 9571203 521
311539571203 121
311517571203 521
3115 4571202 121
3115 7571201 521
311548571202 121
311513571202 121
311516571201 521
311512571203 521
311540571203 121
311521571203 521
311514571203 121
211623422002 511
211629422013 511
211611422003 111
211623422011 511
2116 6422013 111
2116 8422011 111
211610422001 511
211620422003 111
211628422003 111
211626422011 111
211614422003 511
211613422003 511
2116 7422011 511
211620422003 111
211627422013 111
2116164220131011
211639422012 111
211612422013 111
211616422013 511
211631422002 111
2116284220011011
211624422011 111
211628422012 111
211625422003 911
211619422011 511
211623422012 111
2116 1422013 111
2116 4422003 111
211635422002 711
211611422001 111
2116 6422011 511
211626422003 211
2116 4422003 211
2116 3422003 111
2116 6422003 511
211618422013 111
2116 4422001 511
211629422013 111
2116224220131011
2116 9422013 511
211615422001 911
211621422003 511
2116 6422001 511
2116 9422003 111
211616422011 511
211610422002 111
211628422003 111
211614422001 511
211621422003 511
211614422003 111
2116 3422003 111
211635422012 111
211620422002 511
211623422013 111
211646422002 511
211616422013 111
211629422013 111
211611422002 111
211628422003 111
211649422002 111
211624422013 111
211620422002 111
211625422003 111
211638422002 111
211645422012 911
211638422012 111
2116 1422003 111
211624422002 111
211615422003 111
211611422003 111
211622422012 111
211617422013 111
211610422003 111
211624422012 511
2116334220031011
211610422003 111
211627422002 211
211612422003 511
211617422003 511
311634422602 511
311630422613 511
311614422613 111
311620422603 111
311621422603 111
3116 6422603 511
311630422613 511
311627422613 511
311628422602 111
311635422602 111
3116 2422611 111
311652422613 911
311616422603 511
311612422613 111
3116 24226131011
311627422602 511
311612422601 511
311619422611 511
3116304226121111
3116 4422601 511
3116 3422613 111
3116 1422613 111
311646422612 111
311652422612 111
311642422612 111
311633422612 111
311648422602 911
3116 6422603 511
3116 4422601 511
311624422612 511
311612422602 111
311617422612 111
311622422603 211
3116 6422603 511
311620422613 511
3116 7422602 111
311610422603 511
311617422611 111
311616422603 511
3116 7422603 111
3116 9422603 511
311632422611 111
3116 5422601 111
311625422613 111
311620422612 111
311624422612 111
311623422603 111
311639422612 111
311625422613 111
311631422613 511
311612422613 511
3116 1422611 511
311611422611 511
3116 1422601 511
311621422613 111
311633422612 111
311621422613 111
311617422603 111
3116204226131011
311625422603 111
311611422601 111
311613422603 111
311610422603 511
311626422612 111
311623422603 511
311646422602 511
311625422613 511
3116204226121111
311622422613 111
311628422602 511
311634422613 611
311631422613 511
311616422613 111
311628422602 511
3116144226121011
311616422613 111
311614422611 511
311641422612 111
211714651013 111
2117 46510131011
211715651002 111
211717651001 511
211721651012 111
211714651013 511
211718651013 211
211711651013 211
211728651003 111
2117 7651003 111
211711651003 111
211721651013 111
211717651013 411
2117206510031111
211711651003 511
211732651013 811
211715651013 511
2117 86510111011
2117 2651013 111
211723651013 211
211733651013 511
211716651003 111
2117106510111011
211712651002 111
2117 86510011011
2117 3651012 511
211717651013 511
211715651003 111
2117 5651002 111
2117 4651003 111
211712651012 111
2117 36510111011
2117 8651011 511
2117 7651013 511
211726651012 511
211736651013 511
211719651003 911
211717651013 511
211724651013 511
2117 4651003 111
211713651013 511
211725651013 711
2117 5651003 111
211713651002 211
211712651003 111
2117 7651011 111
2117 6651013 111
211725651001 911
2117 4651003 111
2117 7651013 111
211714651013 111
2117146510131111
211712651013 911
211727651013 511
2118227110031111
211810711001 511
211820711012 511
2118 9711011 511
211819711003 111
2118 1711003 111
211824711002 111
2118397110121111
211819711003 511
211820711013 511
211817711013 911
211814711013 111
211821711013 111
2118 8711011 111
211816711011 511
211816711013 111
211811711003 111
211820711013 511
2118 5711003 111
2118187110131011
2118 1711013 111
211816711013 511
211816711013 911
211811711011 711
211813711003 511
211818711011 611
211847711003 111
211847711003 911
2118 27110031111
211819711013 511
2118 1711011 511
2118207110111011
211820711003 511
2118 1711013 511
211823711002 511
211816711011 111
211811711003 511
2118 7711013 111
211831711003 511
211820711003 511
2118 3711003 511
2118 8711001 511
2118 3711001 111
211817711013 111
2118 5711013 111
2118 1711001 511
211811711003 211
211816711013 511
2118 7711001 111
2118 2711001 111
211810711013 211
211829711013 511
211814711013 111
211817711013 511
2118 1711001 111
211840711002 911
211835711003 111
211816711003 511
211810711013 111
211816711001 111
211816711013 511
211816711012 511
211814711003 511
211818711013 511
211811711013 511
31181971 803 811
3118 471 813 511
31182471 813 911
3118 571 803 511
31181371 813 511
31184771 8021111
31181371 803 511
31182071 803 911
31181971 811 511
31182371 802 111
3118 171 811 411
31182971 803 911
31181471 803 511
31181371 803 111
31183371 803 511
31182571 813 111
3118 171 801 511
31182271 803 211
31181571 813 511
31182571 802 511
31181071 813 111
31181671 813 511
31181571 803 511
31181271 813 211
31182871 803 811
31182471 813 511
31182671 803 111
3118 671 801 511
31183171 801 211
31182771 802 511
3118 171 811 111
3118 271 801 511
31181471 811 511
31181771 8011111
3118 471 801 511
31182271 813 111
3118 771 811 111
31184071 813 811
3118 771 801 511
3118 871 803 111
3118 971 811 511
31181271 801 511
31182271 813 511
31181471 8011011
3118 171 803 111
31182071 803 511
31181371 803 111
31182171 812 111
31182171 813 511
31181171 803 511
31182771 813 511
31182271 813 511
3118 371 801 511
3118 371 812 111
3118 571 803 111
31181471 813 911
3118 471 803 111
3118 771 801 511
3118 871 813 511
31181971 813 511
3118 171 801 511
3118 471 801 511
31181771 803 511
311930482702 121
311916482702 121
3119 8482703 721
311928482703 721
311919482703 121
311911482703 121
311926482702 121
311929482702 121
311931482703 921
311921482703 121
311915482703 121
3119 6482701 821
311942482702 121
311933482703 821
3119194827031121
311912482703 121
311950482702 121
3119 6482703 121
311910482701 121
3119344827031121
311946482703 121
311933482702 121
311938482701 721
311923482703 121
311918482703 121
311915482703 721
3119 7482701 121
311910482703 121
3119 4482701 821
311910482701 121
3119 54827011121
311945482702 121
311915482703 121
311920482703 721
311941482703 721
3119164827021121
311946482702 121
311915482701 121
311913482703 121
3119 4482703 821
311941482702 121
311911482701 121
3119 9482703 121
311945482703 721
3119104827031121
311922482703 121
311941482702 121
311926482703 121
311938482703 721
311953482702 121
3119 9482701 121
3119 3482703 121
311929482702 121
311933482703 121
311933482702 121
3119 6482703 121
311923482703 721
311922482703 821
3119 5482703 121
311916482701 121
311914482703 721
311916482702 521
311912482703 521
311920482703 121
311935482702 121
311930482702 121
311931482703 721
311926482703 121
311913482702 121
311913482703 121
311923482703 821
311921482702 121
311913482703 121
311932482703 821
311943482702 121
3119 4482703 121
311963482702 121
212014841113 111
212030841103 511
2120 6841102 111
212030841113 511
212025841112 111
212034841113 111
2120528411131111
2120 9841111 511
212022841113 511
212024841102 111
212039841113 811
2120 4841113 511
2120 7841111 511
2120 1841111 111
212017841113 511
212023841111 511
2120 1841111 511
212011841113 511
2120118411031111
212013841101 511
212015841113 511
2120 9841101 511
212038841113 211
2120 8841103 511
212021841101 511
212018841103 811
212033841103 511
212019841113 511
212029841103 511
212014841113 511
2120 8841101 511
212010841103 111
2120 1841111 511
212022841113 111
2120 7841113 511
212021841113 511
212020841111 111
212013841102 111
2120 2841103 111
212124551813 133
212117551812 133
212130551813 133
212121551812 533
212120551813 133
212137551813 133
212120551813 133
2121165518131133
2121215518121133
212127551813 133
212142551813 133
2121335518131133
2121 4551813 133
212116551813 133
2121 7551811 133
212148551812 533
212113551812 533
212130551813 133
212150551812 133
212128551813 133
212121551813 533
2121255518131133
2121225518131133
212110551811 133
212136551812 133
2121205518131133
2121 4551811 533
2121 85518131133
212117551811 533
2121235518131133
2121 45518131133
212119551813 133
212129551812 133
212110551811 233
212111551811 133
212115551813 233
2121405518131133
2121195518131133
212118551813 133
2121425518121133
212115551813 133
212131551812 133
212218582111 231
2122 2582111 131
2122 2582113 131
212212582113 131
2122 8582113 131
212219582112 131
2122 95821131031
2122 5582113 131
212211582112 531
2122 5582113 131
2122 1582111 131
2122 7582113 131
2122 5582113 131
2122 6582113 131
212222582113 531
2122 1582113 131
2122 4582111 131
2122 2582113 531
2122 5582111 131
2122 4582113 131
212236582113 731
212228582113 131
2122155821131031
2122 45821131031
2122 2582113 131
2122 6582111 131
212213582113 131
2122 7582113 131
212212582113 131
212229582112 131
212221582111 931
2122 8582113 131
2122405821121031
2122 55821131031
2122 8582113 131
2122 7582111 531
212214582113 531
212222582113 531
212223582113 131
2122 6582111 131
212216582113 131
212241582112 131
212225582113 531
2122 2582113 931
212248582112 531
2122 65821111031
2122 3582111 531
3122 7581313 131
3122 6581311 131
312211581313 131
312215581313 131
3122 6581313 131
312211581311 531
3122 7581311 531
3122 7581313 131
312228581312 131
3122 2581313 131
3122 4581313 131
312224581313 531
3122 9581313 131
3122115813131031
312213581313 131
312212581313 131
3122 5581312 131
312228581312 131
312231581313 831
3122215813111031
312226581313 531
312216581312 131
3122185813131031
3122 2581311 131
3122 1581313 131
312211581313 531
3122 9581311 431
312210581313 531
312222581312 131
312238581313 531
312226581313 131
312232581313 431
3122 5581313 131
312218581313 131
312217581311 131
312223581313 131
312227581313 131
3122 3581313 531
312214581313 131
3122 9581313 131
3122 4581311 131
312215581313 131
312210581312 131
3122 9581311 331
312225581313 131
3122 5581313 131
312229581313 131
312215581312 531
3122 4581313 131
312226581313 131
3122235813131131
312211581313 131
3122 6581311 131
312224581312 131
3122 1581311 131
112330481103 121
1123 5481101 521
112316481101 721
112340481103 121
112314481101 121
1123104811011121
112341481103 921
1123 2481103 521
112319481101 621
112315481103 521
112314481103 521
1123 3481101 121
112311481103 221
1123 1481102 121
112342481102 721
1123 1481101 521
112316481101 521
1123 8481101 521
1123 5481103 521
112324481103 521
1123 34811031121
1123 3481103 521
112342481102 521
112315481101 521
1123 2481103 221
112312481101 521
1123 4481101 521
112316481103 521
112311481103 521
1123 24811031021
112325481102 521
1123 9481103 521
112320481103 521
1123 8481102 521
1123 3481101 121
112317481103 721
1123 1481103 121
112316481103 521
1123 9481102 121
112429362812 911
1124 4362803 111
112435362802 111
112424362811 211
112428362803 911
112427362803 111
112429362802 911
112421362803 911
112439362802 111
112414362813 111
1124433628021111
112420362801 711
1124 83628011111
112417362803 111
112417362812 111
112432362802 111
112416362803 111
112420362813 111
112420362813 111
1124 7362811 111
1124 8362811 111
112417362803 111
112415362803 111
1124 1362811 111
1124 1362803 111
1124 2362802 111
112426362802 111
112443362802 111
112424362812 111
112428362813 111
112420362802 111
1124 2362803 511
112411362802 111
1124 3362811 511
1124233628131111
112413362812 111
112442362802 111
112420362813 111
1124 7362803 111
1124203628021111
1124 4362813 111
312426402401 511
3124 6402403 511
3124 6402403 111
312428402402 111
312425402412 911
312410402413 111
312425402413 111
3124 6402401 111
312430402403 111
312429402403 911
312433402412 111
312427402411 111
312426402413 911
312426402412 911
3124 5402411 111
312413402413 111
312434402402 111
312410402413 511
312428402402 111
312433402402 111
312419402403 111
312411402401 111
312435402403 511
312421402413 911
312431402402 911
312425402403 511
312441402412 211
312437402402 911
312423402403 111
3124 9402403 111
312446402403 111
312423402403 111
312422402403 111
312425402403 111
3124394024031111
3124344024031111
312417402402 111
312433402402 111
312410402413 111
312438402412 711
3124284024031111
312424402412 111
312426402402 911
3124274024031111
312430402412 111
312423402403 411
3124 9402401 111
312420402402 711
312424402411 511
312431402413 111
3124 6402413 111
312424402411 811
312418402413 211
312423402413 111
3124 2402413 111
312413402401 911
112518341703 121
112521341703 121
112514341703 121
1125 1341703 121
1125 1341703 621
112511341703 121
1125 4341701 521
1125 6341701 121
112522341703 621
1125 8341701 121
112513341703 121
112517341701 121
1125 6341701 121
1125 9341701 121
112514341702 121
112512341703 121
1125 8341701 121
112514341703 521
112518341702 121
1125 7341701 121
112520341701 121
1125 4341701 121
112527341702 121
1125 2341701 121
112510341703 121
112521341703 921
112512341703 121
112525341703 121
1125 4341701 121
112528341702 121
112513341703 121
112514341703 121
112510341703 121
1125 5341701 421
112514341703 121
112536341702 121
1125183417031121
2125 6541603 121
2125 3541601 121
2125 1541602 121
212525541602 121
212512541603 121
2125 5541601 121
2125 9541603 521
212530541603 121
212512541602 521
2125 7541603 221
212529541603 221
212519541602 121
212513541603 121
2125 5541601 521
212517541603 121
212511541603 121
212516541603 121
2125 5541601 121
2125 7541603 521
212511541603 121
2125 7541601 121
212510541603 121
2125 9541603 121
2125 9541603 121
212513541601 121
2125 5541601 121
2125 5541603 121
212512541603 121
2125 3541603 121
2125 2541601 521
212513541603 121
212516541602 121
2125 4541602 121
3125 8541102 221
3125 1541101 121
312542541102 121
3125 8541103 121
3125 6541101 521
312519541103 121
3125205411031021
312511541103 121
312518541103 521
3125 6541103 121
312517541103 121
312528541102 121
312520541102 721
312517541103 921
3125 2541103 121
3125 4541101 121
3125 1541103 121
312514541103 121
3125 4541101 521
312517541103 121
3125 3541103 121
3125 3541103 121
312520541102 121
3125 2541103 121
312526541103 121
3125 6541101 121
1126 4351711 531
112636351712 131
112612351713 131
1126 2351711 131
112616351713 531
112631351713 531
112622351713 131
112617351712 131
112613351711 531
112621351711 131
112612351713 131
112622351713 131
112611351711 531
1126 9351711 131
112614351713 131
112618351713 131
112621351711 531
112619351712 131
112629351712 131
112611351713 131
112612351713 131
112613351711 531
112617351713 131
112615351713 131
112615351713 131
112611351713 131
112616351713 131
1126 5351713 131
112613351712 131
112610351713 131
112615351713 531
112639351712 131
112616351712 131
112610351711 531
112638351712 131
112629351712 131
112627351712 131
112612351713 131
1126163517131031
112613351713 131
112619351713 131
1126 6351711 131
1126 7351711 131
312615471811 131
312617471813 131
3126 6471813 131
3126 8471811 131
312622471813 131
312633471813 131
312623471813 131
312624471812 131
3126 6471813 131
312642471812 131
312610471813 531
312639471812 131
312622471812 131
312612471813 131
3126 9471813 531
3126 8471811 131
312620471813 131
312631471813 131
3126234718131131
3126 24718111031
3126 2471813 131
312619471813 131
312616471813 531
312618471812 131
312618471813 531
312639471812 131
312617471813 131
3126 3471811 131
312617471813 131
312624471813 531
312631471813 531
312615471813 531
312611471813 131
312621471813 131
3126 6471811 531
312617471813 131
312626471813 131
312615471813 131
312620471812 131
312636471813 131
312610471811 131
3126 8471813 131
312611471811 131
312623471813 131
312624471812 131
312635471813 131
312616471813 131
312633471812 131
3126 9471812 131
3126224718111131
312619471813 531
312635471813 131
3126 9471811 131
312623471813 131
1127133328131111
112715332813 511
1127 3332813 511
1127 3332803 511
1127 9332803 111
112723332803 711
112749332812 111
112723332811 511
1127 7332803 111
112726332812 111
112716332813 511
112725332803 111
112714332812 111
112747332812 111
112732332813 111
112737332802 111
112746332813 111
112750332812 111
112714332803 511
1127 2332802 111
1127313328021111
1127 7332802 111
112736332802 611
112711332811 111
1127 8332803 111
112726332812 511
1127 9332803 511
112713332813 511
112735332802 111
1127 7332803 111
112711332813 611
112735332812 911
112728332813 111
112725332803 911
1127 1332811 111
1127243328131111
1127 5332801 511
112752332812 111
1127 1332813 511
112720332813 111
112731332802 111
1127 6332801 111
1127 6332813 511
1127193328031111
112725332803 711
1127393328121111
112735332802 111
112723332813 511
112732332803 311
112729332803 111
1127 6332801 111
112729332812 111
1127 5332813 111
112716332802 111
112722332813 511
1127 1332813 511
1127 9332801 311
1127 8332811 511
112736332803 511
1127243328131111
1127 9332813 511
112712332811 311
112720332813 111
112726332812 111
112717332803 911
112718332813 111
212715512301 111
212718512303 811
212725512312 511
212710512303 511
2127 7512303 511
2127 1512313 111
2127135123131111
212714512302 111
2127 3512313 511
212711512303 911
212717512313 311
212746512312 111
212727512313 111
212720512313 511
2127 6512303 511
212723512303 511
212714512313 111
2127 1512303 111
212732512303 111
212745512312 111
212731512302 111
212716512303 511
212733512312 111
212711512311 511
212734512312 211
2127 2512313 511
212737512302 111
212741512312 111
2127 2512303 511
212717512302 111
212719512303 511
212718512303 111
212724512303 311
212721512312 111
212742512303 111
212715512303 111
2127175123111111
2127365123121111
2127 9512312 111
212716512313 811
212740512302 511
2127 1512303 111
212723512312 511
212732512312 111
2127 5512311 511
212715512313 511
212744512302 111
212720512301 211
212728512303 511
212716512313 111
212730512303 111
212724512303 511
2127 2512301 611
212733512311 111
212713512303 511
2127355123011111
212719512313 111
212719512312 111
2127 7512311 111
2127 8512302 911
2127185123131111
212729512313 111
2127 3512313 111
212712512313 111
212738512302 111
2127 4512301 111
2127 3512301 111
212718512313 111
212729512302 111
3127 9512711 111
312723512703 111
312713512703 511
3127 15127031011
312741512702 111
3127 5512702 111
312711512713 111
312725512712 111
3127 9512702 111
312724512703 511
3127 4512703 111
312731512713 111
312722512703 311
3127 1512703 111
312730512712 111
3127 7512703 511
312732512712 111
312712512713 111
312731512702 711
3127 1512703 111
3127 2512701 111
312713512713 511
3127 8512711 111
312734512712 111
3127 4512701 511
312717512712 111
312731512712 111
312719512703 111
3127 7512703 111
3127 2512701 111
312713512713 511
312713512713 111
312733512702 111
3127 7512713 511
312720512702 111
3127 6512713 111
312715512711 511
3127 2512713 111
3127 2512711 511
3127 5512702 111
312727512712 111
312715512702 111
312712512712 111
312747512712 111
312728512713 111
312731512712 511
312718512702 111
312710512713 411
312713512712 111
3127 8512711 511
312838422213 711
3128 7422203 111
312817422203 111
312813422203 111
312859422202 111
3128 3422211 111
312831422213 511
312838422213 111
3128 8422203 511
312819422213 511
312810422213 511
312817422203 111
312827422203 111
3128 4422202 111
312831422212 111
312838422202 111
312828422212 111
312820422203 111
312823422203 111
312824422203 111
312813422203 111
312814422202 111
312812422203 111
312813422212 111
3128 6422203 111
312861422202 111
3128 2422203 511
312835422202 111
312817422203 111
312853422202 111
312816422213 511
312833422213 111
3128 7422203 111
312835422213 111
312833422213 111
312845422212 111
3128 7422203 111
312814422211 111
3128 3422203 111
312824422213 111
312844422202 111
312822422213 111
312822422213 111
3128 4422203 611
3128 5422213 111
3128 7422213 111
312848422212 111
3128 9422203 511
312821422213 111
312825422202 111
312841422212 111
312851422202 111
312828422203 111
312818422203 111
312832422203 111
312835422213 111
312830422212 111
312823422203 111
312817422203 111
312814422213 111
312820422203 111
3128 8422203 111
312824422203 111
312836422212 511
112918443203 112
1129 9443203 112
112921443202 212
112917443203 112
1129 3443201 112
1129 5443213 112
112926443203 912
112923443203 112
112931443213 512
112914443203 512
1129 6443213 512
1129 8443211 112
1129 9443213 112
1129 2443203 412
1129 1443203 412
112917443213 112
112910443213 112
1129 2443211 412
112917443213 112
1129 9443211 212
1129 3443211 912
1129 4443203 112
112910443213 512
112913443213 112
112924443203 112
1129 5443203 412
112938443212 112
1129 3443211 112
112924443213 112
112911443202 112
112915443213 112
112934443202 112
112923443213 712
112924443212 112
112937443202 112
1129 8443203 112
112937443202 112
1129 4443201 412
112936443202 112
1129 2443201 412
1129 3443203 112
112943443202 112
112919443212 112
112939443212 112
112925443212 512
112926443213 512
112947443212 112
1129 2443213 112
1129 3443213 512
212931811303 112
212910811310 112
2129 8811310 112
212916811303 112
212922811312 412
212925811312 512
212912811312 112
212914811312 112
212927811303 412
212920811301 112
2129 7811312 112
2129 2811303 112
2129 1811301 412
2129 3811310 112
2129 7811301 112
212912811312 412
2129 3811312 112
2129 6811303 112
212930811302 112
2129 3811301 412
2129 4811301 412
212916811301 912
212930811312 412
212910811301 112
212915811303 112
2129 5811301 412
212913811312 112
212930811312 112
212930811312 112
212913811312 112
212938811302 412
212932811303 412
312921811112 112
312933811102 412
312927811113 312
312931811102 112
3129 28111111112
312923811113 112
3129168111021112
312920811113 112
312923811112 112
312932811113 212
3129 3811113 112
312922811113 112
3129 6811100 412
312913811102 112
312916811113 112
312923811113 712
312919811102 412
312932811102 412
3129 5811100 412
3129 9811102 112
312920811112 112
312919811113 112
3129 1811102 612
312919811113 112
312911811102 112
3129 8811102 412
3129308111021112
312925811112 312
312931811102 412
312927811112 112
312916811113 112
113023252402 721
113010252401 521
113026252403 121
113044252403 121
113012252401 521
113026252403 121
1130172524031121
113016252403 121
1130 8252403 121
113026252403 121
113030252402 121
1130 9252402 121
113040252402 521
1130 9252403 521
113026252402 121
113020252403 721
113033252403 121
1130382524021121
113015252403 121
113034252401 121
113018252403 121
113010252403 521
113022252402 521
113026252402 121
113026252402 521
113014252403 121
1130 6252403 521
113021252402 521
113021252401 121
113033252402 121
1130 4252403 521
113027252401 521
1130 8252403 121
113017252403 121
113025252403 121
113022252402 121
113029252403 721
113011252403 521
113028252402 721
113019252403 121
1130392524021121
1130 9252402 521
113019252402 521
113011252403 121
113021252402 121
113017252403 521
113019252402 121
113022252403 121
113022252402 121
113020252403 521
1130 8252403 121
113026252402 521
113020252403 121
1130 6252403 521
113012252401 521
113030252403 521
113034252403 721
113025252403 521
113026252402 121
113014252403 521
1130332524031121
113019252403 721
113012252403 521
113020252402 121
113033252402 521
113014252403 121
1130 6252401 121
1130 4252403 121
113026252403 521
113011252403 121
1130 3252401 121
113038252402 521
113031252403 121
113021252403 121
113045252402 921
1130202524031121
113014252402 121
113046252402 121
113022252402 121
1130122524031121
113014252403 721
213017322502 121
2130253225021121
213032322503 821
213057322502 821
2130 5322503 121
213018322502 121
2130 3322501 121
213014322503 121
213031322503 721
213014322503 521
213012322501 521
2130 9322502 521
2130 8322501 221
2130 1322501 521
2130 5322503 521
213016322503 921
2130 8322503 121
213042322502 221
213021322502 121
213020322502 121
213039322502 221
213053322502 721
213033322502 821
213018322503 821
213027322502 521
213034322503 821
213026322502 121
213011322501 521
213012322503 121
213051322502 121
213063322502 621
213034322503 121
213010322503 621
213011322503 121
213028322503 121
2130 2322503 521
2130 9322503 221
2130 8322503 121
2130643225021121
213026322503 721
213040322502 721
213038322502 121
213013322503 621
213024322503 121
213026322501 621
213020322501 521
213033322502 121
213027322502 721
213042322503 521
2130323225031021
213017322501 121
213034322502 121
213011322503 521
213026322503 121
2130 3322503 821
213043322502 121
213017322503 821
2130 2322503 521
213033322503 921
2130 5322503 521
213026322503 121
213051322502 121
213023322503 521
213032322503 521
213017322501 621
213017322502 121
213011322502 121
213016322503 121
213024322503 821
213015322503 121
213038322503 521
3130 4322402 121
313016322402 121
313059322403 921
3130 7322403 521
3130 4322401 121
313020322403 521
3130 8322401 521
313036322401 921
313036322402 121
313027322403 821
313016322403 521
313028322402 121
313015322403 121
313027322403 721
313011322403 121
313041322402 121
313022322403 121
313010322403 121
313011322401 521
313014322402 121
3130 5322403 121
313013322402 121
3130 6322401 121
313036322403 521
3130 3322403 121
313026322402 521
313044322403 221
313018322401 721
3130123224031121
313018322403 121
3130 8322403 521
313019322403 121
313026322403 521
3130 3322403 121
3130 93224011121
313018322401 521
313039322403 121
313034322403 721
313033322402 121
313018322402 421
313033322403 521
313016322403 121
3130 2322403 121
313019322402 121
313011322403 521
313015322403 521
313017322403 121
313014322403 221
313026322402 521
3130433224031121
313064322402 821
3130 3322403 521
313019322403 121
3130 2322401 121
313028322402 921
313017322403 521
313032322403 721
313017322403 221
313021322402 121
313027322403 821
3130 9322403 121
313018322402 121
313010322403 121
313041322402 121
313049322403 621
313020322402 121
313044322402 821
313015322402 221
313011322402 121
313017322403 521
313040322402 121
313015322401 721
313018322402 521
3130 5322401 121
313033322402 121
313013322403 121
3130213224021121
3130 9322403 521
313017322403 921
313013322403 121
1131604025121133
113120402512 133
1131 5402511 133
1131 9402513 133
113112402511 533
1131454025121133
1131124025131133
1131 1402511 133
113148402512 533
113110402511 133
1131 8402513 133
1131124025131133
1131394025121133
113119402513 133
113125402513 133
1131 2402513 133
113114402511 733
1131 64025131133
113134402513 133
1131 9402511 533
113129402513 233
113115402513 133
113130402513 133
113113402513 133
113120402513 133
113131402513 533
1131274025131133
1131 6402511 533
113114402513 133
113133402513 133
113113402513 133
113224571311 113
113234571302 113
113230571312 113
1132 45713031113
1132 6571313 113
113221571303 113
113220571313 113
1132 7571313 113
113210571313 113
113227571313 113
113223571311 513
113219571303 113
113216571303 113
113212571301 513
1132 2571301 113
113211571303 113
1132 6571313 513
113217571302 113
2132 5392111 113
2132 73921011113
213232392102 113
213232392102 113
213223392113 113
213213392103 113
213219392102 513
213230392112 513
213245392112 513
213245392112 513
213218392102 113
213234392113 513
213233392112 513
213223392101 913
2132 9392101 513
213217392101 113
213215392111 513
213241392102 113
213226392111 113
213244392112 113
313233391703 513
313218391711 113
313221391702 113
313215391701 113
313213391713 113
313210391703 113
313211391703 913
3132 5391703 513
313226391702 113
313220391703 513
313218391703 113
313211391701 513
313247391702 113
3132 9391703 513
313219391702 113
313212391701 513
313214391703 513
313232391713 113
313222391703 513
313248391712 113
3132 5391703 113
113319223402 121
113321223403 121
1133 6223403 721
113315223402 121
1133 2223403 121
113311223401 121
113326223402 121
1133 1223403 121
113310223401 121
113310223402 121
113336223403 121
113312223403 121
113329223402 721
113316223403 121
113316223402 121
113345223402 121
1133 7223403 121
1133 7223401 721
1133172234031121
113339223402 121
1133 9223403 121
113315223403 121
113325223402 121
113317223403 121
1133 5223403 121
1133 5223401 121
113331223403 821
1133 7223403 121
113313223403 121
1133 1223403 721
113327223403 121
113322223403 121
1133 9223401 121
1133192234031021
113317223403 121
1133 5223403 121
113324223402 121
113316223403 121
1133242234011121
113329223402 121
1133 2223403 121
113332223402 121
1133 9223401 121
113323223403 121
113320223403 121
113330223401 721
113330223402 121
113324223402 121
113310223402 121
113318223403 121
113327223403 121
113328223402 121
113314223403 121
113319223402 121
113320223402 121
113334223402 121
1133 2223403 121
113339223402 121
113324223403 721
113311223403 121
113319223402 121
113349223402 121
113317223402 121
1133 72234031021
113336223402 121
1133 2223401 121
113318223403 121
113341223402 121
113321223402 121
113318223401 121
113319223403 121
113313223402 121
1133 5223402 121
1133 4223401 721
113318223403 121
1133 3223403 121
113337223402 121
113344223402 121
113328223402 121
213337302702 121
213314302703 121
213330302703 821
213310302702 121
213330302703 121
213325302703 121
213314302703 121
213313302703 121
213324302703 821
213313302703 121
213311302701 721
2133 8302703 121
213317302702 121
213327302702 521
2133 8302703 121
2133 9302703 121
2133 8302703 121
213333302703 121
213316302703 121
213314302703 121
213316302703 121
2133 9302702 121
213322302702 121
213328302702 121
213343302702 121
213321302703 721
213334302702 121
213318302703 121
2133 8302703 121
213310302702 121
213315302703 121
2133 7302703 521
213317302703 121
213310302702 121
213312302702 121
213347302702 121
213316302702 121
2133 1302703 121
213311302702 121
213326302703 221
2133 4302703 121
2133 3302701 621
213312302703 121
213325302703 121
213337302702 121
213323302703 121
213314302703 121
2133 8302703 121
213321302703 121
2133 8302701 121
2133 4302703 121
2133 3302703 121
2133 5302703 121
213313302703 121
213318302703 121
2133243027031121
2133 1302701 121
213321302703 121
213311302701 121
213324302703 121
213323302703 121
2133 1302703 121
2133 1302702 121
213325302702 121
213319302702 121
213325302702 121
213313302703 121
213338302702 121
213322302703 121
213317302702 121
213331302702 121
213321302703 121
213325302702 721
2133 1302703 121
2133 4302701 821
313329302603 121
3133 2302601 121
313310302603 121
313335302603 121
313313302602 121
313323302603 121
313333302602 121
3133 93026011021
313314302603 121
313314302603 521
313340302602 121
3133 9302601 121
313314302601 121
313315302602 121
313351302602 121
313343302602 121
313317302603 121
313313302601 121
313336302602 121
3133 9302603 121
313315302603 121
3133 4302601 221
313334302603 221
313321302603 121
313314302603 121
313313302602 121
313318302603 121
313343302602 121
313315302603 121
313352302602 121
313328302602 121
313333302603 121
3133 2302601 121
313318302601 121
313331302603 121
3133 9302603 121
313319302603 121
313320302603 121
3133 1302601 121
3133 6302603 121
313312302603 121
313340302602 121
3133 8302601 521
3133 8302601 121
313318302603 121
313342302602 121
3133 6302601 121
3133 2302601 121
313319302603 121
313318302603 121
313318302603 121
313333302602 121
3133 6302601 121
313332302603 121
313317302603 121
313318302601 121
313319302603 121
313322302602 121
313329302603 121
3133 5302603 121
313325302603 121
3133 8302603 121
313329302603 121
3133 6302603 121
313321302603 121
313318302603 121
3133 7302602 121
313320302601 121
313312302601 721
313345302602 121
313323302603 121
313319302603 121
313317302601 121
313317302602 121
313334302602 121
313339302602 121
313319302603 121
313318302602 121
313334302603 121
313319302603 121
313320302602 221
313321302603 121
313314302601 121
3133 7302601 121
1134 6391913 112
1134 5391913 512
113426391912 512
113419391901 512
1134 8391911 112
1134 6391901 512
1134 7391913 112
113410391912 112
113432391902 112
113411391912 112
113419391911 512
1134 2391903 112
113444391902 112
1134 5391903 512
113418391913 112
1134 4391901 112
113410391901 612
1134 7391913 512
113422391913 112
113434391913 112
113414391913 112
113420391913 512
113436391902 112
113411391913 112
113419391913 112
113419391903 512
113419391913 112
1134 2391901 112
1134 9391913 112
113432391902 512
1134 1391913 112
113425391913 112
1134 2391903 512
1134 9391903 512
113411391913 512
1134 1391903 112
1134 6391901 512
113416391901 512
113412391913 112
113431391903 112
113422391913 512
113418391903 112
1134 1391911 112
113428391913 112
113423391913 512
1134 5391903 112
113418391903 512
113426391902 212
1134 4391901 512
1134 5391913 112
1134 5391903 412
113422391912 512
113423391903 112
113421391903 112
1134 2391903 112
113416391903 512
113413391903 212
113425391902 112
113411391903 112
113421391912 112
113412391913 512
113426391913 112
1134 5391911 112
1134 9391902 512
113429391903 112
113412391903 512
113411391913 112
113420391913 112
113416391912 512
113443391902 112
1134 2391903 112
2134 5571903 112
213416571913 112
2134 2571913 512
213412571913 512
213410571902 512
2134 2571903 112
213415571903 112
213410571903 112
213419571912 112
213427571913 112
2134 3571901 112
213410571901 512
213419571911 512
213414571913 112
2134145719031012
2134 5571901 512
213412571913 112
213412571903 112
213414571902 512
2134 6571911 512
2134 1571903 212
213420571903 112
213429571912 112
213424571912 112
2134 9571903 512
213415571903 512
213421571912 512
213424571912 112
213413571901 112
213413571913 112
213423571912 112
213421571903 112
2134 9571901 112
2134 1571911 112
2134 4571911 112
213417571913 512
2134 2571913 112
2134 6571902 112
2134 6571903 512
213411571913 512
213413571911 512
213411571913 512
213414571913 512
2134235719031112
2134 6571901 512
213416571902 112
213413571903 112
213412571911 112
213412571913 112
2134175719021112
213413571913 112
2134 7571913 112
213412571911 512
2134 4571903 112
2134 4571913 112
213418571913 112
213417571913 112
2134 7571903 512
2134 2571911 112
213425571902 112
2134 1571901 112
213424571903 112
213414571903 112
2134 9571903 112
213412571903 112
213412571911 112
213419571911 512
313432572112 112
313411572101 112
313412572103 112
313426572113 512
313432572102 512
313431572112 112
3134 5572111 112
313425572113 512
313424572103 112
313415572113 512
3134 6572113 112
313416572113 512
313441572102 112
3134 9572112 512
3134 9572101 512
313412572111 512
3134 7572113 112
313412572103 112
313425572103 512
3134 1572103 112
3134 9572101 512
313439572113 512
313415572113 512
313417572111 212
313415572103 512
3134 1572113 512
313421572103 112
3134 7572101 512
313431572112 112
313413572113 512
313440572102 112
313421572103 512
313429572103 112
3134 1572113 112
313423572102 112
313430572112 112
313428572102 112
3134 2572111 512
3134 6572111 112
313413572101 512
313412572101 212
313410572111 512
3134 6572113 112
3134 7572113 112
3134 7572101 512
313418572103 112
3134 1572113 512
3134 7572111 112
313422572113 212
313426572113 112
313424572102 112
313426572103 112
3134 7572103 112
313435572103 612
313423572111 112
3134 4572103 112
313418572112 112
313417572113 112
313410572103 112
313422572111 512
3134 1572103 512
313427572113 512
313421572112 512
313424572103 112
3134405721121012
313415572112 512
313414572111 512
313420572102 112
313418572113 112
313423572113 112
3134 6572111 112
313424572113 512
3134 1572101 112
313429572112 112
313432572112 112
3134 6572101 512
313414572101 112
113510292713 133
113530292712 133
113519292713 133
113544292712 133
1135392927121133
1135392927131133
113519292713 133
1135142927131133
1135372927131133
113514292711 133
1135302927111133
113538292712 133
1135172927111133
1135 3292713 133
1135152927111133
1135192927131133
113532292713 133
113536292711 733
113516292713 133
1135162927131133
113527292713 133
113523292713 133
113524292713 133
113518292713 133
113523292711 133
113526292712 133
113548292712 133
113527292713 133
113532292712 133
1135242927131133
113518292712 133
113526292713 133
113545292712 133
1135212927111133
113530292713 133
1135172927131133
113546292713 133
113530292713 133
1135332927131133
113524292713 133
1135 8292712 133
113524292713 133
1135402927131133
1135412927121133
113538292713 133
1135122927121133
1135542927121133
113510292711 133
1135222927131133
113525292713 233
113515292712 133
113529292713 133
113524292712 533
113532292712 933
113514292713 533
213527352911 133
2135113529111133
213530352913 133
213518352913 133
2135203529131133
2135 83529111133
2135353529131133
2135103529111133
213511352913 133
213546352913 133
213532352913 133
2135513529131133
2135 6352913 133
213521352913 133
213533352912 133
213511352913 133
2135433529131133
2135193529111133
2135 53529131133
213517352912 133
213525352913 133
2135 5352912 133
2135393529121133
2135493529121133
2135473529121133
2135 33529111133
2135163529131133
213517352913 133
213525352912 133
213559352912 133
213522352913 133
2135363529121133
2135203529131133
213523352912 133
213515352913 133
213510352911 133
213524352913 533
313514352511 233
3135413525131133
313514352513 533
313520352513 133
313517352513 533
3135343525121133
313545352512 133
313553352512 133
3135443525131133
313514352513 133
313523352512 133
313543352513 533
313527352512 233
313527352513 133
3135443525121133
313521352513 133
3135253525111133
313519352513 533
313520352512 133
313510352513 133
313543352513 133
313543352512 133
313520352511 533
3135 73525131133
3135 3352513 133
313511352513 233
3135153525111133
313520352513 133
313529352513 133
313531352512 133
3135233525131133
313517352513 133
3135253525111133
313549352512 133
313534352513 133
3135343525121133
313521352512 133
3135333525131133
313548352512 133
313540352512 533
313522352513 533
313522352512 133
313525352512 133
3135183525131133
313551352512 133
3135 23525111133
3135173525131133
313545352512 133
313528352513 133
313534352512 133
313536352512 533
313530352513 133
313523352513 133
313524352513 133
313544352512 333
313513352513 133
313526352513 133
313522352513 133
3135363525111133
213614522003 513
213646522002 113
213623522003 113
213617522003 113
2136295220031113
2136 75220011113
213615522003 113
2136395220021113
2136105220011113
213642522002 113
2136 8522001 113
213638522003 513
2136 5522003 113
213610522003 813
213639522002 113
213633522003 113
2136 4522003 113
213631522002 113
213614522001 113
2136215220031113
213615522003 513
213627522003 113
213614522001 513
213616522003 113
213615522001 113
213618522003 113
2136 4522003 113
213616522003 113
3137294615011011
313718461503 511
3137 5461503 511
3137 8461503 111
3137 2461501 511
3137184615031011
313712461512 111
3137 8461511 211
313725461503 111
3137 8461501 511
313721461513 111
313715461503 511
313719461513 111
3137 1461513 111
3137154615111111
313716461502 511
3137 5461501 611
3137 2461503 111
313723461503 111
313711461513 511
3137 9461503 111
3137154615131111
3137 5461501 111
313717461513 111
3137 6461503 511
3137 8461503 111
313714461503 111
3137 4461501 111
313736461502 211
313720461502 111
3137164615031111
3137 6461501 511
313714461513 111
313723461503 111
3137 7461503 111
313728461503 211
313710461503 511
3137 8461511 511
313718461502 111
313726461502 211
313711461503 511
313711461501 111
313720461513 111
313719461513 511
313718461503 211
3137 8461503 111
313734461503 211
313717461513 111
313717461502 511
313722461501 111
3137 6461511 211
3137 4461513 111
3137294615131111
3137 6461512 511
313719461512 111
3137 4461503 511
313712461513 511
3137 6461502 111
313724461501 911
313713461502 111
313717461502 511
313711461511 511
3137 9461501 211
313723461513 111
313713461503 511
313716461511 211
313723461503 111
3137 4461513 111
313722461512 111
3137 1461503 111
313723461503 111
3137 9461503 111
3137 8461501 511
3137 8461503 111
313712461502 111
3137 4461503 511
313712461513 511
3137 7461511 511
313716461513 111
3138 7472003 711
3138 3472003 511
313813472013 511
3138 4472011 211
313811472001 111
313813472002 511
3138 3472011 511
3138 6472013 111
3138 3472003 111
313828472013 111
313851472013 711
3138 84720131111
3138 1472001 111
3138 2472001 111
313853472002 111
313833472013 711
3138 2472003 111
313813472002 511
3138 6472003 511
313822472003 511
3138 1472001 511
313837472013 511
313822472003 511
313819472002 211
313816472001 711
3138 3472001 111
3138 4472003 111
3138 4472002 511
313836472012 111
313812472003 111
3138 1472003 511
313825472003 111
313811472003 111
313812472003 511
3138 8472002 111
3138 6472001 111
3138 3472011 511
313810472003 111
313810472013 111
3138 1472001 511
313823472002 111
3138484720021111
313848472012 111
313836472012 111
313816472013 511
313812472003 111
3138 8472003 511
3138 4472001 511
313818472003 911
313832472012 111
3138 3472001 711
313833472013 511
3138 5472001 911
313829472002 111
313826472011 111
3138 4472001 511
313835472012 111
313811472013 511
3138 5472001 511
313821472013 211
313818472003 511
313816472013 511
313830472013 611
313841472002 111
3138 4472001 511
3138 1472003 111
313812472003 111
313815472011 511
313811472003 111
313823472003 611
3138 1472013 111
313826472012 111
313920382413 131
313922382413 131
313927382413 131
313918382413 531
313915382411 131
3139 5382411 831
313929382413 131
3139 1382413 131
313914382413 231
3139 7382413 131
313915382413 131
313913382413 131
313911382413 131
3139 3382411 531
313938382412 131
313912382412 131
313910382413 131
313915382413 131
3139 8382413 231
313918382413 131
313914382413 131
313934382412 431
313918382413 131
