# Supplementary material
Source: ML conference proceedings conference paper supplement (https://proceedings.mlr.press/v139/konobeev21a.html)
Supplement: Supplementary file 2 [file konobeev21a-supp.zip › inmeta/__init__.py]

""" inmeta package initialization. """
from inmeta.experiment import (
    Results,
    ExpPlotter,
    Experiment,
    BatchedExperiment,
    dump,
    load,
)
import inmeta.experiment
from inmeta.factory import (
    Factory,
    SyntheticExpFactory,
    FourierExpFactory,
    SphericalExpFactory,
    SubspaceExpFactory,
    SchoolExpFactory,
)
import inmeta.factory
import inmeta.meta_learner
import inmeta.plot
import inmeta.task
