# Supplementary material
Source: ML conference proceedings conference paper supplement (https://proceedings.mlr.press/v139/konobeev21a.html)
Supplement: Supplementary file 2 [file konobeev21a-supp.zip › inmeta/factory/__init__.py]

""" inmeta.factory subpackage initialization. """
from inmeta.factory.factory import Factory, get_defaults_parser
from inmeta.factory.synthetic import (
    SyntheticExpFactory,
    FourierExpFactory,
    SubspaceExpFactory,
    SphericalExpFactory)
from inmeta.factory.school import SchoolExpFactory
