# Supplementary material
Source: ML conference proceedings conference paper supplement (https://proceedings.mlr.press/v139/konobeev21a.html)
Supplement: Supplementary file 2 [file konobeev21a-supp.zip › inmeta/plot.py]

""" Plotting utilities. """
from functools import partial
import matplotlib.pyplot as plt
import numpy as np
from scipy.stats import mstats


def set_figure_settings(xlabel, ylabel, grid=True, title=None, legend=True):
  """ Setups up current figure. """
  plt.xlabel(xlabel)
  plt.ylabel(ylabel)
  plt.grid(grid)
  if title is not None:
    plt.title(title)
  if legend:
    plt.legend()


# pylint: disable=invalid-name,too-many-arguments
def _plot_median_quantiles(xplot_fn, ys, probs=(0.25, 0.75), axis=0,
                           label=None, alpha=0.3):
  """ Plots median and quantiles. """
  if len(probs) != 2:
    raise ValueError(f"probs must have length 2, got len(probs)={len(probs)}")
  probs = [probs[0], 0.5, probs[1]]
  quantiles = mstats.mquantiles(ys, probs, axis=axis)
  line, = xplot_fn(quantiles[1], label=label)
  xs, = xplot_fn.args
  fill = plt.fill_between(xs, quantiles[0], quantiles[2],
                          color=line.get_color(), alpha=alpha)
  return line, fill


def plot_median_quantiles(x, ys, probs=(0.25, 0.75),
                        axis=0, label=None, alpha=0.3):
  """ Plot quantiles. """
  _plot_median_quantiles(partial(plt.plot, x),
                         ys, probs, axis, label, alpha)

def semilogy_median_quantiles(x, ys, probs=(0.25, 0.75),
                            axis=0, label=None, alpha=0.3):
  """ Y-axis log plot of quantiles. """
  _plot_median_quantiles(partial(plt.semilogy, x),
                         ys, probs, axis, label, alpha)

def semilogx_median_quantiles(x, ys, probs=(0.25, 0.75),
                            axis=0, label=None, alpha=0.3):
  """ X-axis log plot of quantiles. """
  _plot_median_quantiles(partial(plt.semilogx, x),
                         ys, probs, axis, label, alpha)

def loglog_median_quantiles(x, ys, probs=(0.25, 0.75),
                          axis=0, label=None, alpha=0.3):
  """ Log-log plot of quantiles. """
  _plot_median_quantiles(partial(plt.loglog, x),
                         ys, probs, axis, label, alpha)


def _plot_mean_std(xplot_fn, ys, axis=0, label=None,
                   ylim=(-np.inf, np.inf), alpha=0.3):
  """ Plots mean and standard deviation area. """
  mean = np.mean(ys, axis)
  std = np.std(ys, axis)
  line, = xplot_fn(mean, label=label)
  x, = xplot_fn.args
  fill = plt.fill_between(x,
                          np.maximum(ylim[0], mean - std),
                          np.minimum(ylim[1], mean + std),
                          color=line.get_color(),
                          alpha=alpha)
  return line, fill


def plot_mean_std(x, ys, axis=0, label=None,
                  ylim=(-np.inf, np.inf), alpha=0.3):
  """ Plots mean and standard deviation area. """
  _plot_mean_std(partial(plt.plot, x), ys, axis, label, ylim, alpha)

def semilogy_mean_std(x, ys, axis=0, label=None,
                      ylim=(-np.inf, np.inf), alpha=0.3):
  """ Y-axis log plot of mean and standard deviation area. """
  _plot_mean_std(partial(plt.semilogy, x), ys, axis, label, ylim, alpha)

def semilogx_mean_std(x, ys, axis=0, label=None,
                      ylim=(-np.inf, np.inf), alpha=0.3):
  """ X-axis log plot of mean and standard deviation area. """
  _plot_mean_std(partial(plt.semilogx, x), ys, axis, label, ylim, alpha)

def loglog_mean_std(x, ys, axis=0, label=None,
                    ylim=(-np.inf, np.inf), alpha=0.3):
  """ Log-log plot of mean and standard deviation area. """
  _plot_mean_std(partial(plt.loglog, x), ys, axis, label, ylim, alpha)


def _plot_mean_lines(plot_fn, ys, axis=0, label=None, alpha=0.3):
  """ Plots all lines and their mean using plot_fn. """
  ys = np.asarray(ys)
  line, = plot_fn(np.mean(ys, axis), label=label, lw=3)
  n = ys.shape[axis]
  for i in range(n):
    plot_fn(np.take(ys, i, axis), color=line.get_color(), alpha=alpha)

def plot_mean_lines(x, ys, axis=0, label=None, alpha=0.3):
  """ Plots all lines and their mean. """
  _plot_mean_lines(partial(plt.plot, x), ys, axis, label, alpha)

def semilogy_mean_lines(x, ys, axis=0, label=None, alpha=0.3):
  """ Y-axis log plot of lines and their mean. """
  _plot_mean_lines(partial(plt.semilogy, x), ys, axis, label, alpha)

def semilogx_mean_lines(x, ys, axis=0, label=None, alpha=0.3):
  """ X-axis log plot of lines and their mean. """
  _plot_mean_lines(partial(plt.semilogx, x), ys, axis, label, alpha)

def loglog_mean_lines(x, ys, axis=0, label=None, alpha=0.3):
  """ Log-log plot of lines and their mean. """
  _plot_mean_lines(partial(plt.loglog, x), ys, axis, label, alpha)
