# Supplementary material
Source: ML conference proceedings conference paper supplement (https://proceedings.mlr.press/v139/konobeev21a.html)
Supplement: Supplementary file 2 [file konobeev21a-supp.zip › inmeta/scripts/attach.sh]

while [ ! $(docker container ps -qaf ancestor=gcr.io/meta-theory/inmeta) ]; do
    sleep 3
done
CONTAINER_ID=$(docker container ps -qaf ancestor=gcr.io/meta-theory/inmeta)

sleep 5

if [ $(docker container inspect -f '{{.State.Status}}' ${CONTAINER_ID}) \
        == 'running' ]; then
    docker attach ${CONTAINER_ID}
fi
