# Supplementary material
Source: ML conference proceedings conference paper supplement (https://proceedings.mlr.press/v139/konobeev21a.html)
Supplement: Supplementary file 2 [file konobeev21a-supp.zip › inmeta/scripts/inmeta]

""" Main script to run experiments. """
#!usr/bin/env python3
from argparse import ArgumentParser
import os
import inmeta
from inmeta.scripts.gcloud import run_batch


def get_exp_type_factory_classes():
  """ Returns factories classes dict. """
  return {
      "spherical": inmeta.SphericalExpFactory,
      "fourier": inmeta.FourierExpFactory,
      "subspace": inmeta.SubspaceExpFactory,
      "school": inmeta.SchoolExpFactory
  }


def get_script_defaults():
  """ Returns nested dictionary of default args for each experiment type. """
  return {
      "spherical": {
          "ntasks-default": 40,
          "task-size-default": 40,
      },
      "fourier": {
          "ntasks-default": 10,
          "task-size-default": 10,
      },
  }


def get_base_args():
  parser = ArgumentParser()
  parser.add_argument("factory", type=str,
                      choices=list(get_exp_type_factory_classes()))
  args, _ = parser.parse_known_args()
  defaults = get_script_defaults().get(args.factory, {})
  defaults.update({"logdir": dict(required=True),
                   "num-instances": dict(type=int),
                   "figure-name-prefix": dict(type=str),
                   "show": dict(action="store_true")})
  parser = inmeta.factory.get_defaults_parser(defaults, base_parser=parser)
  return parser.parse_known_args()


def main():
  args, unknown_args = get_base_args()
  if not os.path.isdir(args.logdir):
    os.makedirs(args.logdir)

  if args.num_instances is not None:
    kwargs = {key: getattr(args, key.replace('-', '_'))
              for key in ("ntasks-default", "task-size-default")
              if hasattr(args, key.replace('-', '_'))}
    run_batch(args.num_instances, args.factory, args.logdir,
              *unknown_args, **kwargs)
    exp = inmeta.BatchedExperiment.from_files(
        [os.path.join(args.logdir, f"w{i:02d}", "exp.pickle")
         for i in range(args.num_instances)]
    )
  else:
    factory_class = get_exp_type_factory_classes()[args.factory]
    factory = factory_class.from_args(args=unknown_args)
    exp = factory.make()
    exp.run(ntasks_default=getattr(args, "ntasks_default", None),
            task_size_default=getattr(args, "task_size_default", None))
    inmeta.dump(exp, os.path.join(args.logdir, "exp.pickle"))

  exp.plot(os.path.join(args.logdir, args.figure_name_prefix)
           if args.figure_name_prefix is not None else None,
           show=args.show)


if __name__ == "__main__":
  main()
